# Supplementary material for: Characterization of the Metabolic, Clinical and Neuropsychological Phenotype of Female Carriers of the Premutation in the X-Linked FMR1 Gene
Source: Front Mol Biosci. 2020 Oct 22;7:578640. doi: 10.3389/fmolb.2020.578640 (PMC7642626; doi:10.3389/fmolb.2020.578640)
Supplement: Supplementary file 1 [file Table_1.XLSX]

## Sheet: LOG2FC
#node	ID	LOG2FC		annotation
ADK	ADK	-1.62016	ENSP00000286621	Adenosine kinase; ATP dependent phosphorylation of adenosine and other related nucleoside analogs to monophosphate derivatives. Serves as a potential regulator of concentrations of extracellular adenosine and intracellular adenine nucleotides; Belongs to the carbohydrate kinase PfkB family
AFM	AFM	-4.43367	ENSP00000226355	Afamin; Vitamin E binding protein. May transport vitamin E in body fluids under conditions where the lipoprotein system is not sufficient. May be involved in the regulation and transport of vitamin E at the blood-brain barrier; Belongs to the ALB/AFP/VDB family
AGT	AGT	-1.62016	ENSP00000355627	Angiotensinogen; Essential component of the renin-angiotensin system (RAS), a potent regulator of blood pressure, body fluid and electrolyte homeostasis; Endogenous ligands
AHNAK	AHNAK	-2.1136	ENSP00000367263	Neuroblast differentiation-associated protein AHNAK; May be required for neuronal cell differentiation; PDZ domain containing
ALDOA	ALDOA	1.28363	ENSP00000378669	Fructose-bisphosphate aldolase A; Plays a key role in glycolysis and gluconeogenesis. In addition, may also function as scaffolding protein (By similarity); Belongs to the class I fructose-bisphosphate aldolase family
ARHGEF7	ARHGEF7	-2.1136	ENSP00000364893	Rho guanine nucleotide exchange factor 7; Acts as a RAC1 guanine nucleotide exchange factor (GEF) and can induce membrane ruffling. Functions in cell migration, attachment and cell spreading. Promotes targeting of RAC1 to focal adhesions (By similarity). May function as a positive regulator of apoptosis. Downstream of NMDA receptors and CaMKK-CaMK1 signaling cascade, promotes the formation of spi…
ARPC3	ARPC3	3.1536	ENSP00000228825	Actin-related protein 2/3 complex subunit 3; Functions as component of the Arp2/3 complex which is involved in regulation of actin polymerization and together with an activating nucleation-promoting factor (NPF) mediates the formation of branched actin networks; Belongs to the ARPC3 family
ATP5O	ATP5O	-2.79549	ENSP00000290299	ATP synthase subunit O, mitochondrial; Mitochondrial membrane ATP synthase (F(1)F(0) ATP synthase or Complex V) produces ATP from ADP in the presence of a proton gradient across the membrane which is generated by electron transport complexes of the respiratory chain. F-type ATPases consist of two structural domains, F(1) - containing the extramembraneous catalytic core and F(0) - containing the m…
ATP6V1A	ATP6V1A	1.96675	ENSP00000273398	V-type proton ATPase catalytic subunit A; Catalytic subunit of the peripheral V1 complex of vacuolar ATPase. V-ATPase vacuolar ATPase is responsible for acidifying a variety of intracellular compartments in eukaryotic cells. In aerobic conditions, involved in intracellular iron homeostasis, thus triggering the activity of Fe(2+) prolyl hydroxylase (PHD) enzymes, and leading to HIF1A hydroxylation…
AZGP1	AZGP1	-5.17981	ENSP00000292401	Zinc-alpha-2-glycoprotein; Stimulates lipid degradation in adipocytes and causes the extensive fat losses associated with some advanced cancers. May bind polyunsaturated fatty acids; Belongs to the MHC class I family
C9orf142	C9orf142	-2.1136	ENSP00000360682	Protein PAXX; Involved in non-homologous end joining (NHEJ), a major pathway to repair double-strand breaks in DNA. May act as a scaffold required to stabilize the Ku heterodimer, composed of XRCC5/Ku80 and XRCC6/Ku70, at double-strand break sites and promote the assembly and/or stability of the NHEJ machinery
CA2	CA2	8.20896	ENSP00000285379	Carbonic anhydrase 2; Essential for bone resorption and osteoclast differentiation (By similarity). Reversible hydration of carbon dioxide. Can hydrate cyanamide to urea. Involved in the regulation of fluid secretion into the anterior chamber of the eye. Contributes to intracellular pH regulation in the duodenal upper villous epithelium during proton-coupled peptide absorption. Stimulates the chl…
CCL5	CCL5	3.28433	ENSP00000474412	C-C motif chemokine 5; Chemoattractant for blood monocytes, memory T-helper cells and eosinophils. Causes the release of histamine from basophils and activates eosinophils. May activate several chemokine receptors including CCR1, CCR3, CCR4 and CCR5. One of the major HIV-suppressive factors produced by CD8+ T-cells. Recombinant RANTES protein induces a dose-dependent inhibition of different strai…
CCT6A	CCT6A	-2.1136	ENSP00000275603	T-complex protein 1 subunit zeta; Molecular chaperone; assists the folding of proteins upon ATP hydrolysis. Known to play a role, in vitro, in the folding of actin and tubulin; Belongs to the TCP-1 chaperonin family
CDC5L	CDC5L	-3.11126	ENSP00000360532	Cell division cycle 5-like protein; DNA-binding protein involved in cell cycle control. May act as a transcription activator. Component of the PRP19-CDC5L complex that forms an integral part of the spliceosome and is required for activating pre-mRNA splicing. The PRP19-CDC5L complex may also play a role in the response to DNA damage (DDR); Myb/SANT domain containing
CDK17	CDK17	-2.1136	ENSP00000261211	Cyclin-dependent kinase 17; May play a role in terminally differentiated neurons. Has a Ser/Thr-phosphorylating activity for histone H1 (By similarity); Cyclin dependent kinases
CFP	CFP	-3.02828	ENSP00000247153	Properdin; A positive regulator of the alternate pathway of complement. It binds to and stabilizes the C3- and C5-convertase enzyme complexes
CHD4	CHD4	-2.1136	ENSP00000349508	Chromodomain-helicase-DNA-binding protein 4; Component of the histone deacetylase NuRD complex which participates in the remodeling of chromatin by deacetylating histones; Belongs to the SNF2/RAD54 helicase family
COTL1	COTL1	1.80826	ENSP00000262428	Coactosin-like protein; Binds to F-actin in a calcium-independent manner. Has no direct effect on actin depolymerization. Acts as a chaperone for ALOX5 (5LO), influencing both its stability and activity in leukotrienes synthesis
CRIP1	CRIP1	-2.01726	ENSP00000332449	Cysteine-rich protein 1; Seems to have a role in zinc absorption and may function as an intracellular zinc transport protein; LIM domain containing
CSTB	CSTB	2.56276	ENSP00000291568	Cystatin-B; This is an intracellular thiol proteinase inhibitor. Tightly binding reversible inhibitor of cathepsins L, H and B; Belongs to the cystatin family
CTCF	CTCF	-2.1136	ENSP00000264010	Transcriptional repressor CTCF; Chromatin binding factor that binds to DNA sequence specific sites. Involved in transcriptional regulation by binding to chromatin insulators and preventing interaction between promoter and nearby enhancers and silencers. Acts as transcriptional repressor binding to promoters of vertebrate MYC gene and BAG1 gene. Also binds to the PLK and PIM1 promoters. Acts as a …
CTSD	CTSD	1.96675	ENSP00000236671	Cathepsin D; Acid protease active in intracellular protein breakdown. Plays a role in APP processing following cleavage and activation by ADAM30 which leads to APP degradation. Involved in the pathogenesis of several diseases such as breast cancer and possibly Alzheimer disease; Cathepsins
CTSZ	CTSZ	2.56276	ENSP00000217131	Cathepsin Z; Exhibits carboxy-monopeptidase as well as carboxy- dipeptidase activity; Cathepsins
DBI	DBI	3.75497	ENSP00000439012	Acyl-CoA-binding protein; Binds medium- and long-chain acyl-CoA esters with very high affinity and may function as an intracellular carrier of acyl-CoA esters. It is also able to displace diazepam from the benzodiazepine (BZD) recognition site located on the GABA type A receptor. It is therefore possible that this protein also acts as a neuropeptide to modulate the action of the GABA receptor
DDX17	DDX17	-2.1136	ENSP00000380033	Probable ATP-dependent RNA helicase DDX17; As an RNA helicase, unwinds RNA and alters RNA structures through ATP binding and hydrolysis. Involved in multiple cellular processes, including pre-mRNA splicing, alternative splicing, ribosomal RNA processing and miRNA processing, as well as transcription regulation. Regulates the alternative splicing of exons exhibiting specific features. For instance…
DDX5	DDX5	3.7495	ENSP00000225792	Probable ATP-dependent RNA helicase DDX5; Involved in the alternative regulation of pre-mRNA splicing; its RNA helicase activity is necessary for increasing tau exon 10 inclusion and occurs in a RBM4-dependent manner. Binds to the tau pre-mRNA in the stem-loop region downstream of exon 10. The rate of ATP hydrolysis is highly stimulated by single-stranded RNA. Involved in transcriptional regulati…
DNAJC8	DNAJC8	-2.1136	ENSP00000263697	DnaJ homolog subfamily C member 8; Suppresses polyglutamine (polyQ) aggregation of ATXN3 in neuronal cells; DNAJ heat shock proteins
DSTN	DSTN	4.00583	ENSP00000246069	Destrin; Actin-depolymerizing protein. Severs actin filaments (F- actin) and binds to actin monomers (G-actin). Acts in a pH- independent manner
ECH1	ECH1	-3.97072	ENSP00000221418	Delta(3,5)-Delta(2,4)-dienoyl-CoA isomerase, mitochondrial; Isomerization of 3-trans,5-cis-dienoyl-CoA to 2-trans,4- trans-dienoyl-CoA
ECHS1	ECHS1	-2.1136	ENSP00000357535	Enoyl-CoA hydratase, mitochondrial; Straight-chain enoyl-CoA thioesters from C4 up to at least C16 are processed, although with decreasing catalytic rate. Has high substrate specificity for crotonyl-CoA and moderate specificity for acryloyl-CoA, 3-methylcrotonyl-CoA and methacrylyl-CoA. It is noteworthy that binds tiglyl-CoA, but hydrates only a small amount of this substrate
EEF1B2	EEF1B2	-2.79549	ENSP00000376056	Elongation factor 1-beta; EF-1-beta and EF-1-delta stimulate the exchange of GDP bound to EF-1-alpha to GTP
EFHD2	EFHD2	5.43319	ENSP00000365147	EF-hand domain-containing protein D2; May regulate B-cell receptor (BCR)-induced immature and primary B-cell apoptosis. Plays a role as negative regulator of the canonical NF-kappa-B-activating branch. Controls spontaneous apoptosis through the regulation of BCL2L1 abundance; EF-hand domain containing
EIF3A	EIF3A	-2.79549	ENSP00000358140	Eukaryotic translation initiation factor 3 subunit A; RNA-binding component of the eukaryotic translation initiation factor 3 (eIF-3) complex, which is required for several steps in the initiation of protein synthesis. The eIF-3 complex associates with the 40S ribosome and facilitates the recruitment of eIF-1, eIF-1A, eIF- 2:GTP:methionyl-tRNAi and eIF-5 to form the 43S pre-initiation complex (43…
EIF4A2	EIF4A2	-2.1136	ENSP00000326381	Eukaryotic initiation factor 4A-II; ATP-dependent RNA helicase which is a subunit of the eIF4F complex involved in cap recognition and is required for mRNA binding to ribosome. In the current model of translation initiation, eIF4A unwinds RNA secondary structures in the 5'-UTR of mRNAs which is necessary to allow efficient binding of the small ribosomal subunit, and subsequent scanning for the in…
EIF6	EIF6	1.96675	ENSP00000363574	Eukaryotic translation initiation factor 6; Binds to the 60S ribosomal subunit and prevents its association with the 40S ribosomal subunit to form the 80S initiation complex in the cytoplasm. Behaves as a stimulatory translation initiation factor downstream insulin/growth factors. Is also involved in ribosome biogenesis. Associates with pre-60S subunits in the nucleus and is involved in its nucle…
CORO7	CORO7	-1.62016	ENSP00000460885	Coronin-7; F-actin regulator involved in anterograde Golgi to endosome transport: upon ubiquitination via 'Lys-33'-linked ubiquitin chains by the BCR(KLHL20) E3 ubiquitin ligase complex, interacts with EPS15 and localizes to the trans-Golgi network, where it promotes actin polymerization, thereby facilitating post- Golgi trafficking. May play a role in the maintenance of the Golgi apparatus morph…
ERP44	ERP44	3.27887	ENSP00000262455	Endoplasmic reticulum resident protein 44; Mediates thiol-dependent retention in the early secretory pathway, forming mixed disulfides with substrate proteins through its conserved CRFS motif. Inhibits the calcium channel activity of ITPR1. May have a role in the control of oxidative protein folding in the endoplasmic reticulum. Required to retain ERO1A and ERO1B in the endoplasmic reticulum
EWSR1	EWSR1	-2.1136	ENSP00000400142	RNA-binding protein EWS; Might normally function as a transcriptional repressor. EWS-fusion-proteins (EFPS) may play a role in the tumorigenic process. They may disturb gene expression by mimicking, or interfering with the normal function of CTD-POLII within the transcription initiation complex. They may also contribute to an aberrant activation of the fusion protein target genes; Belongs to the …
FANCI	FANCI	-2.1136	ENSP00000310842	Fanconi anemia group I protein; Plays an essential role in the repair of DNA double- strand breaks by homologous recombination and in the repair of interstrand DNA cross-links (ICLs) by promoting FANCD2 monoubiquitination by FANCL and participating in recruitment to DNA repair sites. Required for maintenance of chromosomal stability. Specifically binds branched DNA: binds both single- stranded DN…
FBL	FBL	-2.1136	ENSP00000221801	rRNA 2'-O-methyltransferase fibrillarin; S-adenosyl-L-methionine-dependent methyltransferase that has the ability to methylate both RNAs and proteins. Involved in pre-rRNA processing by catalyzing the site-specific 2'-hydroxyl methylation of ribose moieties in pre-ribosomal RNA. Site specificity is provided by a guide RNA that base pairs with the substrate. Methylation occurs at a characteristic …
FBLN1	FBLN1	-2.1136	ENSP00000331544	Fibulin-1; Incorporated into fibronectin-containing matrix fibers. May play a role in cell adhesion and migration along protein fibers within the extracellular matrix (ECM). Could be important for certain developmental processes and contribute to the supramolecular organization of ECM architecture, in particular to those of basement membranes. Has been implicated in a role in cellular transformat…
G3BP1	G3BP1	-2.1136	ENSP00000377681	Ras GTPase-activating protein-binding protein 1; May be a regulated effector of stress granule assembly. Phosphorylation-dependent sequence-specific endoribonuclease in vitro. Cleaves exclusively between cytosine and adenine and cleaves MYC mRNA preferentially at the 3'-UTR. ATP- and magnesium- dependent helicase. Unwinds preferentially partial DNA and RNA duplexes having a 17 bp annealed portion…
GGCT	GGCT	1.96675	ENSP00000275428	Gamma-glutamylcyclotransferase; Catalyzes the formation of 5-oxoproline from gamma- glutamyl dipeptides and may play a significant role in glutathione homeostasis. Induces release of cytochrome c from mitochondria with resultant induction of apoptosis; Belongs to the gamma-glutamylcyclotransferase family
GSTP1	GSTP1	3.00653	ENSP00000381607	Glutathione S-transferase P; Conjugation of reduced glutathione to a wide number of exogenous and endogenous hydrophobic electrophiles. Regulates negatively CDK5 activity via p25/p35 translocation to prevent neurodegeneration; Soluble glutathione S-transferases
H2AFV	H2AFV	-5.17981	ENSP00000308405	Histone H2A.V; Variant histone H2A which replaces conventional H2A in a subset of nucleosomes. Nucleosomes wrap and compact DNA into chromatin, limiting DNA accessibility to the cellular machineries which require DNA as a template. Histones thereby play a central role in transcription regulation, DNA repair, DNA replication and chromosomal stability. DNA accessibility is regulated via a complex s…
H2AFX	H2AFX	-3.64672	ENSP00000434024	Histone H2AX; Variant histone H2A which replaces conventional H2A in a subset of nucleosomes. Nucleosomes wrap and compact DNA into chromatin, limiting DNA accessibility to the cellular machineries which require DNA as a template. Histones thereby play a central role in transcription regulation, DNA repair, DNA replication and chromosomal stability. DNA accessibility is regulated via a complex se…
H2AFY	H2AFY	-3.08763	ENSP00000423563	Core histone macro-H2A.1; Variant histone H2A which replaces conventional H2A in a subset of nucleosomes where it represses transcription. Nucleosomes wrap and compact DNA into chromatin, limiting DNA accessibility to the cellular machineries which require DNA as a template. Histones thereby play a central role in transcription regulation, DNA repair, DNA replication and chromosomal stability. DN…
HAGH	HAGH	-2.1136	ENSP00000380514	Hydroxyacylglutathione hydrolase, mitochondrial; Thiolesterase that catalyzes the hydrolysis of S-D- lactoyl-glutathione to form glutathione and D-lactic acid; Belongs to the metallo-beta-lactamase superfamily. Glyoxalase II family
HGFAC	HGFAC	-2.19026	ENSP00000421801	Hepatocyte growth factor activator; Activates hepatocyte growth factor (HGF) by converting it from a single chain to a heterodimeric form; Belongs to the peptidase S1 family
HINT1	HINT1	-3.02828	ENSP00000304229	Histidine triad nucleotide-binding protein 1; Hydrolyzes purine nucleotide phosphoramidates with a single phosphate group, including adenosine 5'monophosphoramidate (AMP-NH2), adenosine 5'monophosphomorpholidate (AMP-morpholidate) and guanosine 5'monophosphomorpholidate (GMP-morpholidate). Hydrolyzes lysyl-AMP (AMP-N-epsilon-(N-alpha-acetyl lysine methyl ester)) generated by lysine tRNA ligase, a…
HIST1H1C	HIST1H1C	-2.1136	ENSP00000339566	Histone H1.2; Histone H1 protein binds to linker DNA between nucleosomes forming the macromolecular structure known as the chromatin fiber. Histones H1 are necessary for the condensation of nucleosome chains into higher-order structured fibers. Acts also as a regulator of individual gene transcription through chromatin remodeling, nucleosome spacing and DNA methylation (By similarity)
HIST1H3A	HIST1H3A	-2.1136	ENSP00000480826	Histone cluster 1 H3 family member a; Core component of nucleosome. Nucleosomes wrap and compact DNA into chromatin, limiting DNA accessibility to the cellular machineries which require DNA as a template. Histones thereby play a central role in transcription regulation, DNA repair, DNA replication and chromosomal stability. DNA accessibility is regulated via a complex set of post-translational mo…
HIST2H3A	HIST2H3A	-2.1136	ENSP00000385479	Histone H3.2; Core component of nucleosome. Nucleosomes wrap and compact DNA into chromatin, limiting DNA accessibility to the cellular machineries which require DNA as a template. Histones thereby play a central role in transcription regulation, DNA repair, DNA replication and chromosomal stability. DNA accessibility is regulated via a complex set of post-translational modifications of histones,…
HK1	HK1	3.51421	ENSP00000402103	Hexokinase-1; Hexokinase 1
HNRNPH3	HNRNPH3	-2.1136	ENSP00000265866	Heterogeneous nuclear ribonucleoprotein H3; Involved in the splicing process and participates in early heat shock-induced splicing arrest. Due to their great structural variations the different isoforms may possess different functions in the splicing reaction; RNA binding motif containing
HNRNPM	HNRNPM	-7.71572	ENSP00000325376	Heterogeneous nuclear ribonucleoprotein M; Pre-mRNA binding protein in vivo, binds avidly to poly(G) and poly(U) RNA homopolymers in vitro. Involved in splicing. Acts as a receptor for carcinoembryonic antigen in Kupffer cells, may initiate a series of signaling events leading to tyrosine phosphorylation of proteins and induction of IL-1 alpha, IL-6, IL-10 and tumor necrosis factor alpha cytokines
HNRNPU	HNRNPU	-2.89006	ENSP00000283179	Heterogeneous nuclear ribonucleoprotein U; DNA- and RNA-binding protein involved in several cellular processes such as nuclear chromatin organization, telomere-length regulation, transcription, mRNA alternative splicing and stability, Xist-mediated transcriptional silencing and mitotic cell progression. Plays a role in the regulation of interphase large-scale gene-rich chromatin organization thro…
HPR	HPR	-2.1136	ENSP00000441828	Haptoglobin-related protein; Primate-specific plasma protein associated with apolipoprotein L-I (apoL-I)-containing high-density lipoprotein (HDL). This HDL particle, termed trypanosome lytic factor-1 (TLF- 1), mediates human innate immune protection against many species of African trypanosomes. Binds hemoglobin with high affinity and may contribute to the clearance of cell-free hemoglobin to all…
HRG	HRG	-5.14582	ENSP00000232003	Histidine-rich glycoprotein; Plasma glycoprotein that binds a number of ligands such as heme, heparin, heparan sulfate, thrombospondin, plasminogen, and divalent metal ions. Binds heparin and heparin/glycosaminoglycans in a zinc-dependent manner. Binds heparan sulfate on the surface of liver, lung, kidney and heart endothelial cells. Binds to N-sulfated polysaccharide chains on the surface of liv…
HSD17B10	HSD17B10	-2.1136	ENSP00000168216	3-hydroxyacyl-CoA dehydrogenase type-2; Mitochondrial dehydrogenase that catalyzes the beta- oxidation at position 17 of androgens and estrogens and has 3- alpha-hydroxysteroid dehydrogenase activity with androsterone. Catalyzes the third step in the beta-oxidation of fatty acids. Carries out oxidative conversions of 7-alpha-OH and 7-beta-OH bile acids. Also exhibits 20-beta- OH and 21-OH dehydro…
ITGB1	ITGB1	2.32753	ENSP00000379350	Integrin beta-1; Integrins alpha-1/beta-1, alpha-2/beta-1, alpha-10/beta- 1 and alpha-11/beta-1 are receptors for collagen. Integrins alpha- 1/beta-1 and alpha-2/beta-2 recognize the proline-hydroxylated sequence G-F-P-G-E-R in collagen. Integrins alpha-2/beta-1, alpha- 3/beta-1, alpha-4/beta-1, alpha-5/beta-1, alpha-8/beta-1, alpha- 10/beta-1, alpha-11/beta-1 and alpha-V/beta-1 are receptors for…
ITIH3	ITIH3	-2.1136	ENSP00000415769	Inter-alpha-trypsin inhibitor heavy chain H3; May act as a carrier of hyaluronan in serum or as a binding protein between hyaluronan and other matrix protein, including those on cell surfaces in tissues to regulate the localization, synthesis and degradation of hyaluronan which are essential to cells undergoing biological processes
KIF21A	KIF21A	-2.1136	ENSP00000354878	Kinesin-like protein KIF21A; Microtubule-binding motor protein probably involved in neuronal axonal transport. In vitro, has a plus-end directed motor activity (By similarity); Kinesins
KLKB1	KLKB1	-6.32121	ENSP00000264690	Plasma kallikrein; The enzyme cleaves Lys-Arg and Arg-Ser bonds. It activates, in a reciprocal reaction, factor XII after its binding to a negatively charged surface. It also releases bradykinin from HMW kininogen and may also play a role in the renin-angiotensin system by converting prorenin into renin; Belongs to the peptidase S1 family. Plasma kallikrein subfamily
LDHB	LDHB	-1.32624	ENSP00000379386	Lactate dehydrogenase B; Belongs to the LDH/MDH superfamily. LDH family
LRRFIP1	LRRFIP1	-1.62016	ENSP00000375857	Leucine-rich repeat flightless-interacting protein 1; Transcriptional repressor which preferentially binds to the GC-rich consensus sequence (5'-AGCCCCCGGCG-3') and may regulate expression of TNF, EGFR and PDGFA. May control smooth muscle cells proliferation following artery injury through PDGFA repression. May also bind double-stranded RNA. Positively regulates Toll-like receptor (TLR) signaling…
LSP1	LSP1	-2.1136	ENSP00000371194	Lymphocyte-specific protein 1; May play a role in mediating neutrophil activation and chemotaxis
LTA4H	LTA4H	3.91442	ENSP00000228740	Leukotriene A-4 hydrolase; Epoxide hydrolase that catalyzes the final step in the biosynthesis of the proinflammatory mediator leukotriene B4. Has also aminopeptidase activity; M1 metallopeptidases
LTBP1	LTBP1	7.84841	ENSP00000386043	Latent-transforming growth factor beta-binding protein 1; May be involved in the assembly, secretion and targeting of TGFB1 to sites at which it is stored and/or activated. May play critical roles in controlling and directing the activity of TGFB1. May have a structural role in the extracellular matrix (ECM); Latent transforming growth factor beta binding proteins
MATR3	MATR3	-2.1136	ENSP00000354346	Matrin-3; May play a role in transcription or may interact with other nuclear matrix proteins to form the internal fibrogranular network. In association with the SFPQ-NONO heteromer may play a role in nuclear retention of defective RNAs. Plays a role in the regulation of DNA virus-mediated innate immune response by assembling into the HDP-RNP complex, a complex that serves as a platform for IRF3 …
MNDA	MNDA	4.35116	ENSP00000357123	Myeloid cell nuclear differentiation antigen; May act as a transcriptional activator/repressor in the myeloid lineage. Plays a role in the granulocyte/monocyte cell- specific response to interferon. Stimulates the DNA binding of the transcriptional repressor protein YY1; Pyrin and HIN domain family
MT2A	MT2A	11.3239	ENSP00000245185	Metallothionein-2; Metallothioneins have a high content of cysteine residues that bind various heavy metals; these proteins are transcriptionally regulated by both heavy metals and glucocorticoids; Belongs to the metallothionein superfamily. Type 1 family
NAPA	NAPA	3.32372	ENSP00000263354	Alpha-soluble NSF attachment protein; Required for vesicular transport between the endoplasmic reticulum and the Golgi apparatus (Probable). Together with GNA12 promotes CDH5 localization to plasma membrane; Belongs to the SNAP family
NCL	NCL	-3.69251	ENSP00000318195	Nucleolin; Nucleolin is the major nucleolar protein of growing eukaryotic cells. It is found associated with intranucleolar chromatin and pre-ribosomal particles. It induces chromatin decondensation by binding to histone H1. It is thought to play a role in pre-rRNA transcription and ribosome assembly. May play a role in the process of transcriptional elongation. Binds RNA oligonucleotides with 5'…
NUB1	NUB1	-2.1136	ENSP00000454264	NEDD8 ultimate buster 1; Specific down-regulator of the NEDD8 conjugation system. Recruits NEDD8, UBD, and their conjugates to the proteasome for degradation. Isoform 1 promotes the degradation of NEDD8 more efficiently than isoform 2
PCBP2	PCBP2	-2.19026	ENSP00000352438	Poly(rC)-binding protein 2; Single-stranded nucleic acid binding protein that binds preferentially to oligo dC. Major cellular poly(rC)-binding protein. Binds also poly(rU). Negatively regulates cellular antiviral responses mediated by MAVS signaling. It acts as an adapter between MAVS and the E3 ubiquitin ligase ITCH, therefore triggering MAVS ubiquitination and degradation
PDIA4	PDIA4	3.27478	ENSP00000286091	Protein disulfide-isomerase A4; Protein disulfide isomerase family A member 4; Belongs to the protein disulfide isomerase family
PER2	PER2	-3.64672	ENSP00000254657	Period circadian protein homolog 2; Transcriptional repressor which forms a core component of the circadian clock. The circadian clock, an internal time- keeping system, regulates various physiological processes through the generation of approximately 24 hour circadian rhythms in gene expression, which are translated into rhythms in metabolism and behavior. It is derived from the Latin roots 'cir…
PGD	PGD	3.64495	ENSP00000270776	6-phosphogluconate dehydrogenase, decarboxylating; Catalyzes the oxidative decarboxylation of 6- phosphogluconate to ribulose 5-phosphate and CO(2), with concomitant reduction of NADP to NADPH; Belongs to the 6-phosphogluconate dehydrogenase family
PGLYRP2	PGLYRP2	-2.1136	ENSP00000345968	N-acetylmuramoyl-L-alanine amidase; May play a scavenger role by digesting biologically active peptidoglycan (PGN) into biologically inactive fragments. Has no direct bacteriolytic activity; Belongs to the N-acetylmuramoyl-L-alanine amidase 2 family
PIKFYVE	PIKFYVE	-6.7132	ENSP00000264380	1-phosphatidylinositol 3-phosphate 5-kinase; The PI(3,5)P2 regulatory complex regulates both the synthesis and turnover of phosphatidylinositol 3,5-bisphosphate (PtdIns(3,5)P2). Catalyzes the phosphorylation of phosphatidylinositol 3-phosphate on the fifth hydroxyl of the myo- inositol ring, to form phosphatidylinositol 3,5-bisphosphate. Required for endocytic-vacuolar pathway and nuclear migrati…
PLCB2	PLCB2	3.75497	ENSP00000260402	1-phosphatidylinositol 4,5-bisphosphate phosphodiesterase beta-2; The production of the second messenger molecules diacylglycerol (DAG) and inositol 1,4,5-trisphosphate (IP3) is mediated by activated phosphatidylinositol-specific phospholipase C enzymes; C2 domain containing phospholipases
PLIN3	PLIN3	-3.02828	ENSP00000221957	Perilipin-3; Required for the transport of mannose 6-phosphate receptors (MPR) from endosomes to the trans-Golgi network; Perilipins
PNN	PNN	-2.1136	ENSP00000216832	Pinin; Transcriptional activator binding to the E-box 1 core sequence of the E-cadherin promoter gene; the core-binding sequence is 5'CAGGTG-3'. Capable of reversing CTBP1-mediated transcription repression. Auxiliary component of the splicing- dependent multiprotein exon junction complex (EJC) deposited at splice junction on mRNAs. The EJC is a dynamic structure consisting of core proteins and se…
PON1	PON1	-1.62016	ENSP00000222381	Serum paraoxonase/arylesterase 1; Hydrolyzes the toxic metabolites of a variety of organophosphorus insecticides. Capable of hydrolyzing a broad spectrum of organophosphate substrates and lactones, and a number of aromatic carboxylic acid esters. Mediates an enzymatic protection of low density lipoproteins against oxidative modification and the consequent series of events leading to atheroma form…
PPP5C	PPP5C	-2.1136	ENSP00000012443	Serine/threonine-protein phosphatase 5; Serine/threonine-protein phosphatase that dephosphorylates a myriad of proteins involved in different signaling pathways including the kinases CSNK1E, ASK1/MAP3K5, PRKDC and RAF1, the nuclear receptors NR3C1, PPARG, ESR1 and ESR2, SMAD proteins and TAU/MAPT. Implicated in wide ranging cellular processes, including apoptosis, differentiation, DNA damage resp…
PRDX2	PRDX2	-2.91016	ENSP00000301522	Peroxiredoxin-2; Thiol-specific peroxidase that catalyzes the reduction of hydrogen peroxide and organic hydroperoxides to water and alcohols, respectively. Plays a role in cell protection against oxidative stress by detoxifying peroxides and as sensor of hydrogen peroxide-mediated signaling events. Might participate in the signaling cascades of growth factors and tumor necrosis factor-alpha by r…
PRDX6	PRDX6	6.68024	ENSP00000342026	Peroxiredoxin-6; Thiol-specific peroxidase that catalyzes the reduction of hydrogen peroxide and organic hydroperoxides to water and alcohols, respectively. Can reduce H(2)O(2) and short chain organic, fatty acid, and phospholipid hydroperoxides. Also has phospholipase activity, and can therefore either reduce the oxidized sn-2 fatty acyl grup of phospholipids (peroxidase activity) or hydrolyze t…
PRPS1	PRPS1	-1.62016	ENSP00000361512	Ribose-phosphate pyrophosphokinase 1; Catalyzes the synthesis of phosphoribosylpyrophosphate (PRPP) that is essential for nucleotide synthesis; Belongs to the ribose-phosphate pyrophosphokinase family
PSMA1	PSMA1	7.38603	ENSP00000414359	Proteasome subunit alpha type-1; Component of the 20S core proteasome complex involved in the proteolytic degradation of most intracellular proteins. This complex plays numerous essential roles within the cell by associating with different regulatory particles. Associated with two 19S regulatory particles, forms the 26S proteasome and thus participates in the ATP-dependent degradation of ubiquiti…
PSMB8	PSMB8	2.56276	ENSP00000364016	Proteasome subunit beta type-8; The proteasome is a multicatalytic proteinase complex which is characterized by its ability to cleave peptides with Arg, Phe, Tyr, Leu, and Glu adjacent to the leaving group at neutral or slightly basic pH. The proteasome has an ATP-dependent proteolytic activity. This subunit is involved in antigen processing to generate class I binding peptides. Replacement of PS…
PSMD2	PSMD2	-1.62016	ENSP00000310129	26S proteasome non-ATPase regulatory subunit 2; Component of the 26S proteasome, a multiprotein complex involved in the ATP-dependent degradation of ubiquitinated proteins. This complex plays a key role in the maintenance of protein homeostasis by removing misfolded or damaged proteins, which could impair cellular functions, and by removing proteins whose functions are no longer required. Therefo…
PSME2	PSME2	-5.17981	ENSP00000216802	Proteasome activator complex subunit 2; Implicated in immunoproteasome assembly and required for efficient antigen processing. The PA28 activator complex enhances the generation of class I binding peptides by altering the cleavage pattern of the proteasome
PURA	PURA	-2.1136	ENSP00000332706	Transcriptional activator protein Pur-alpha; This is a probable transcription activator that specifically binds the purine-rich single strand of the PUR element located upstream of the MYC gene. May play a role in the initiation of DNA replication and in recombination
RAB10	RAB10	6.10546	ENSP00000264710	Ras-related protein Rab-10; The small GTPases Rab are key regulators of intracellular membrane trafficking, from the formation of transport vesicles to their fusion with membranes. Rabs cycle between an inactive GDP-bound form and an active GTP-bound form that is able to recruit to membranes different set of downstream effectors directly responsible for vesicle formation, movement, tethering and …
RAB6B	RAB6B	2.92351	ENSP00000285208	Ras-related protein Rab-6B; Seems to have a role in retrograde membrane traffic at the level of the Golgi complex. May function in retrograde transport in neuronal cells; Belongs to the small GTPase superfamily. Rab family
RAB8B	RAB8B	2.32753	ENSP00000312734	Ras-related protein Rab-8B; The small GTPases Rab are key regulators of intracellular membrane trafficking, from the formation of transport vesicles to their fusion with membranes. Rabs cycle between an inactive GDP-bound form and an active GTP-bound form that is able to recruit to membranes different sets of downstream effectors directly responsible for vesicle formation, movement, tethering and…
RAC1	RAC1	2.68812	ENSP00000348461	Ras-related C3 botulinum toxin substrate 1; Plasma membrane-associated small GTPase which cycles between active GTP-bound and inactive GDP-bound states. In its active state, binds to a variety of effector proteins to regulate cellular responses such as secretory processes, phagocytosis of apoptotic cells, epithelial cell polarization and growth-factor induced formation of membrane ruffles. Rac1 p…
RALY	RALY	-4.96571	ENSP00000246194	RNA-binding protein Raly; RNA-binding protein that acts as a transcriptional cofactor for cholesterol biosynthetic genes in the liver. Binds the lipid-responsive non-coding RNA LeXis and is required for LeXis-mediated effect on cholesterogenesis (By similarity). May be a heterogeneous nuclear ribonucleoprotein (hnRNP); Belongs to the RRM HNRPC family. RALY subfamily
RBM3	RBM3	-2.1136	ENSP00000365950	RNA-binding protein 3; Cold-inducible mRNA binding protein that enhances global protein synthesis at both physiological and mild hypothermic temperatures. Reduces the relative abundance of microRNAs, when overexpressed. Enhances phosphorylation of translation initiation factors and active polysome formation (By similarity)
RPL10	RPL10	-6.32121	ENSP00000413436	60S ribosomal protein L10; Component of the large ribosomal subunit. Plays a role in the formation of actively translating ribosomes. May play a role in the embryonic brain development
RPL10A	RPL10A	-3.64672	ENSP00000363018	60S ribosomal protein L10a; Component of the large ribosomal subunit
RPL13	RPL13	-2.1136	ENSP00000307889	Ribosomal protein L13
RPL13A	RPL13A	-1.62016	ENSP00000375730	60S ribosomal protein L13a; Associated with ribosomes but is not required for canonical ribosome function and has extra-ribosomal functions. Component of the GAIT (gamma interferon-activated inhibitor of translation) complex which mediates interferon-gamma-induced transcript-selective translation inhibition in inflammation processes. Upon interferon-gamma activation and subsequent phosphorylation…
RPL14	RPL14	-3.64672	ENSP00000379506	60S ribosomal protein L14; Component of the large ribosomal subunit; Belongs to the eukaryotic ribosomal protein eL14 family
RPL15	RPL15	-3.80343	ENSP00000309334	Ribosomal protein L15
RPL18A	RPL18A	-1.62016	ENSP00000222247	Ribosomal protein L18a
RPL22	RPL22	-5.14582	ENSP00000346088	Ribosomal protein L22; Belongs to the eukaryotic ribosomal protein eL22 family
RPL26	RPL26	-2.1136	ENSP00000463784	Ribosomal protein L26
RPL29	RPL29	-2.19026	ENSP00000418868	60S ribosomal protein L29; Component of the large ribosomal subunit
RPL32	RPL32	-3.40865	ENSP00000416429	Ribosomal protein L32; Belongs to the eukaryotic ribosomal protein eL32 family
RPL34	RPL34	-3.08763	ENSP00000378163	60S ribosomal protein L34; Component of the large ribosomal subunit
RPL37A	RPL37A	-2.1136	ENSP00000418082	Ribosomal protein L37a
RPL7	RPL7	-1.62016	ENSP00000339795	60S ribosomal protein L7; Component of the large ribosomal subunit. Binds to G-rich structures in 28S rRNA and in mRNAs. Plays a regulatory role in the translation apparatus; inhibits cell-free translation of mRNAs
RPL7A	RPL7A	-5.17981	ENSP00000361076	Ribosomal protein L7a
RPLP1	RPLP1	-2.1136	ENSP00000346037	60S acidic ribosomal protein P1; Plays an important role in the elongation step of protein synthesis; Belongs to the eukaryotic ribosomal protein P1/P2 family
RPS12	RPS12	-2.44732	ENSP00000230050	Ribosomal protein S12
RPS16	RPS16	-2.1136	ENSP00000251453	Ribosomal protein S16
RPS19	RPS19	-2.1136	ENSP00000470972	40S ribosomal protein S19; Required for pre-rRNA processing and maturation of 40S ribosomal subunits; Belongs to the eukaryotic ribosomal protein eS19 family
RPS23	RPS23	-2.1136	ENSP00000296674	40S ribosomal protein S23; Component of the ribosome, a large ribonucleoprotein complex responsible for the synthesis of proteins in the cell. The small ribosomal subunit (SSU) binds messenger RNAs (mRNAs) and translates the encoded message by selecting cognate aminoacyl-transfer RNA (tRNA) molecules. The large subunit (LSU) contains the ribosomal catalytic site termed the peptidyl transferase ce…
RPS25	RPS25	-2.13184	ENSP00000435096	Ribosomal protein S25
RPS26	RPS26	-3.64672	ENSP00000348849	Ribosomal protein S26; Belongs to the eukaryotic ribosomal protein eS26 family
RPS29	RPS29	-2.1136	ENSP00000379339	Ribosomal protein S29
RPS3A	RPS3A	-2.1136	ENSP00000346050	40S ribosomal protein S3a; May play a role during erythropoiesis through regulation of transcription factor DDIT3; Belongs to the eukaryotic ribosomal protein eS1 family
RPS4X	RPS4X	-2.13184	ENSP00000362744	Ribosomal protein S4, X-linked; Belongs to the eukaryotic ribosomal protein eS4 family
RPS5	RPS5	-3.64672	ENSP00000472985	Ribosomal protein S5; Belongs to the universal ribosomal protein uS7 family
RPS6	RPS6	-3.64672	ENSP00000369757	40S ribosomal protein S6; May play an important role in controlling cell growth and proliferation through the selective translation of particular classes of mRNA; S ribosomal proteins
RPS7	RPS7	-2.1136	ENSP00000339095	40S ribosomal protein S7; Required for rRNA maturation; Belongs to the eukaryotic ribosomal protein eS7 family
RRM1	RRM1	-3.11126	ENSP00000300738	Ribonucleoside-diphosphate reductase large subunit; Provides the precursors necessary for DNA synthesis. Catalyzes the biosynthesis of deoxyribonucleotides from the corresponding ribonucleotides
RTCB	RTCB	-2.1136	ENSP00000216038	tRNA-splicing ligase RtcB homolog; Catalytic subunit of the tRNA-splicing ligase complex that acts by directly joining spliced tRNA halves to mature-sized tRNAs by incorporating the precursor-derived splice junction phosphate into the mature tRNA as a canonical 3',5'- phosphodiester. May act as an RNA ligase with broad substrate specificity, and may function toward other RNAs
S100A6	S100A6	3.70584	ENSP00000357709	Protein S100-A6; May function as calcium sensor and modulator, contributing to cellular calcium signaling. May function by interacting with other proteins, such as TPR-containing proteins, and indirectly play a role in many physiological processes such as the reorganization of the actin cytoskeleton and in cell motility. Binds 2 calcium ions. Calcium binding is cooperative; EF-hand domain contain…
S100A8	S100A8	3.67158	ENSP00000357722	Protein S100-A8; S100A8 is a calcium- and zinc-binding protein which plays a prominent role in the regulation of inflammatory processes and immune response. It can induce neutrophil chemotaxis and adhesion. Predominantly found as calprotectin (S100A8/A9) which has a wide plethora of intra- and extracellular functions. The intracellular functions include: facilitating leukocyte arachidonic acid tr…
S100A9	S100A9	2.14266	ENSP00000357727	Protein S100-A9; S100A9 is a calcium- and zinc-binding protein which plays a prominent role in the regulation of inflammatory processes and immune response. It can induce neutrophil chemotaxis, adhesion, can increase the bactericidal activity of neutrophils by promoting phagocytosis via activation of SYK, PI3K/AKT, and ERK1/2 and can induce degranulation of neutrophils by a MAPK-dependent mechani…
SAA2-SAA4	SAA2-SAA4	-2.1136	ENSP00000485552	SAA2-SAA4 readthrough
SDHB	SDHB	-2.1136	ENSP00000364649	Succinate dehydrogenase [ubiquinone] iron-sulfur subunit, mitochondrial; Iron-sulfur protein (IP) subunit of succinate dehydrogenase (SDH) that is involved in complex II of the mitochondrial electron transport chain and is responsible for transferring electrons from succinate to ubiquinone (coenzyme Q)
SDPR	SDPR	3.31016	ENSP00000305675	Caveolae-associated protein 2; Plays an important role in caveolar biogenesis and morphology. Regulates caveolae morphology by inducing membrane curvature within caveolae. Plays a role in caveola formation in a tissue-specific manner. Required for the formation of caveolae in the lung and fat endothelia but not in the heart endothelia. Negatively regulates the size or stability of CAVIN complexes…
SEC31A	SEC31A	-2.13184	ENSP00000378721	Protein transport protein Sec31A; Component of the coat protein complex II (COPII) which promotes the formation of transport vesicles from the endoplasmic reticulum (ER). The coat has two main functions, the physical deformation of the endoplasmic reticulum membrane into vesicles and the selection of cargo molecules (By similarity); WD repeat domain containing
SERPINF1	SERPINF1	-3.02828	ENSP00000254722	Pigment epithelium-derived factor; Neurotrophic protein; induces extensive neuronal differentiation in retinoblastoma cells. Potent inhibitor of angiogenesis. As it does not undergo the S (stressed) to R (relaxed) conformational transition characteristic of active serpins, it exhibits no serine protease inhibitory activity; Serpin peptidase inhibitors
SH3BP1	SH3BP1	-2.1136	ENSP00000350018	SH3 domain-binding protein 1; GTPase activating protein (GAP) which specifically converts GTP-bound Rho-type GTPases including RAC1 and CDC42 in their inactive GDP-bound form. By specifically inactivating RAC1 at the leading edge of migrating cells, it regulates the spatiotemporal organization of cell protrusions which is important for proper cell migration. Also negatively regulates CDC42 in the…
SLC25A5	SLC25A5	1.96675	ENSP00000360671	ADP/ATP translocase 2; Catalyzes the exchange of cytoplasmic ADP with mitochondrial ATP across the mitochondrial inner membrane. As part of the mitotic spindle-associated MMXD complex it may play a role in chromosome segregation; Solute carriers
SMARCC1	SMARCC1	-3.97072	ENSP00000254480	SWI/SNF complex subunit SMARCC1; Involved in transcriptional activation and repression of select genes by chromatin remodeling (alteration of DNA-nucleosome topology). Component of SWI/SNF chromatin remodeling complexes that carry out key enzymatic activities, changing chromatin structure by altering DNA-histone contacts within a nucleosome in an ATP-dependent manner. May stimulate the ATPase act…
SND1	SND1	1.96675	ENSP00000346762	Staphylococcal nuclease domain-containing protein 1; Functions as a bridging factor between STAT6 and the basal transcription factor. Plays a role in PIM1 regulation of MYB activity. Functions as a transcriptional coactivator for the Epstein-Barr virus nuclear antigen 2 (EBNA2); Tudor domain containing
SNRPB	SNRPB	-3.64672	ENSP00000412566	Small nuclear ribonucleoprotein-associated proteins B and B; Core component of the spliceosomal U1, U2, U4 and U5 small nuclear ribonucleoproteins (snRNPs), the building blocks of the spliceosome. Thereby, plays an important role in the splicing of cellular pre-mRNAs. Most spliceosomal snRNPs contain a common set of Sm proteins SNRPB, SNRPD1, SNRPD2, SNRPD3, SNRPE, SNRPF and SNRPG that assemble i…
SOD2	SOD2	2.54983	ENSP00000446252	Superoxide dismutase [Mn], mitochondrial; Destroys superoxide anion radicals which are normally produced within the cells and which are toxic to biological systems
SRP14	SRP14	-2.28612	ENSP00000267884	Signal recognition particle 14 kDa protein; Signal-recognition-particle assembly has a crucial role in targeting secretory proteins to the rough endoplasmic reticulum membrane. SRP9 together with SRP14 and the Alu portion of the SRP RNA, constitutes the elongation arrest domain of SRP. The complex of SRP9 and SRP14 is required for SRP RNA binding
SRSF3	SRSF3	-1.69975	ENSP00000362820	Serine/arginine-rich splicing factor 3; Splicing factor that specifically promotes exon- inclusion during alternative splicing. Interaction with YTHDC1, a RNA-binding protein that recognizes and binds N6-methyladenosine (m6A)-containing RNAs, promotes recruitment of SRSF3 to its mRNA-binding elements adjacent to m6A sites, leading to exon-inclusion during alternative splicing. Also functions as e…
STK10	STK10	-2.1136	ENSP00000176763	Serine/threonine-protein kinase 10; Serine/threonine-protein kinase involved in regulation of lymphocyte migration. Phosphorylates MSN, and possibly PLK1. Involved in regulation of lymphocyte migration by mediating phosphorylation of ERM proteins such as MSN. Acts as a negative regulator of MAP3K1/MEKK1. May also act as a cell cycle regulator by acting as a polo kinase kinase: mediates phosphoryl…
SYNCRIP	SYNCRIP	-3.1477	ENSP00000358635	Heterogeneous nuclear ribonucleoprotein Q; Heterogenous nuclear ribonucleoprotein (hnRNP) implicated in mRNA processing mechanisms. Component of the CRD- mediated complex that promotes MYC mRNA stability. Isoform 1, isoform 2 and isoform 3 are associated in vitro with pre-mRNA, splicing intermediates and mature mRNA protein complexes. Isoform 1 binds to apoB mRNA AU-rich sequences. Isoform 1 is p…
TBCA	TBCA	3.28433	ENSP00000306362	Tubulin-specific chaperone A; Tubulin-folding protein; involved in the early step of the tubulin folding pathway
TEK	TEK	-3.64672	ENSP00000369375	Angiopoietin-1 receptor; Tyrosine-protein kinase that acts as cell-surface receptor for ANGPT1, ANGPT2 and ANGPT4 and regulates angiogenesis, endothelial cell survival, proliferation, migration, adhesion and cell spreading, reorganization of the actin cytoskeleton, but also maintenance of vascular quiescence. Has anti-inflammatory effects by preventing the leakage of proinflammatory plasma protei…
TMA7	TMA7	-2.1136	ENSP00000397843	Translation machinery associated 7 homolog
TMOD3	TMOD3	4.83696	ENSP00000308753	Tropomodulin-3; Blocks the elongation and depolymerization of the actin filaments at the pointed end. The Tmod/TM complex contributes to the formation of the short actin protofilament, which in turn defines the geometry of the membrane skeleton (By similarity); Belongs to the tropomodulin family
TPP1	TPP1	2.56276	ENSP00000299427	Tripeptidyl-peptidase 1; Lysosomal serine protease with tripeptidyl-peptidase I activity. May act as a non-specific lysosomal peptidase which generates tripeptides from the breakdown products produced by lysosomal proteinases. Requires substrates with an unsubstituted N-terminus (By similarity)
TPT1	TPT1	2.31434	ENSP00000477781	Translationally-controlled tumor protein; Involved in calcium binding and microtubule stabilization
UNC13D	UNC13D	2.56276	ENSP00000207549	Protein unc-13 homolog D; Plays a role in cytotoxic granule exocytosis in lymphocytes. Required for both granule maturation and granule docking and priming at the immunologic synapse. Regulates assembly of recycling and late endosomal structures, leading to the formation of an endosomal exocytic compartment that fuses with perforin-containing granules at the immunologic synapse and licences them …
VWF	VWF	10.3733	ENSP00000261405	Von Willebrand factor; Important in the maintenance of hemostasis, it promotes adhesion of platelets to the sites of vascular injury by forming a molecular bridge between sub-endothelial collagen matrix and platelet-surface receptor complex GPIb-IX-V. Also acts as a chaperone for coagulation factor VIII, delivering it to the site of injury, stabilizing its heterodimeric structure and protecting i…
XRCC6	XRCC6	-2.26985	ENSP00000352257	X-ray repair cross-complementing protein 6; Single-stranded DNA-dependent ATP-dependent helicase. Has a role in chromosome translocation. The DNA helicase II complex binds preferentially to fork-like ends of double-stranded DNA in a cell cycle-dependent manner. It works in the 3'-5' direction. Binding to DNA may be mediated by XRCC6. Involved in DNA non-homologous end joining (NHEJ) required for …
ZSCAN2	ZSCAN2	-2.1136	ENSP00000410198	Zinc finger and SCAN domain-containing protein 2; May be involved in transcriptional regulation during the post-meiotic stages of spermatogenesis; SCAN domain containing

## Sheet: GO BP
#term ID	term description	observed gene count	background gene count	false discovery rate	matching proteins in your network (IDs)	matching proteins in your network (labels)
GO:0006614	SRP-dependent cotranslational protein targeting to membrane	29	92	1.2e-31	ENSP00000222247,ENSP00000230050,ENSP00000251453,ENSP00000267884,ENSP00000296674,ENSP00000307889,ENSP00000309334,ENSP00000339095,ENSP00000339795,ENSP00000346037,ENSP00000346050,ENSP00000346088,ENSP00000348849,ENSP00000361076,ENSP00000362744,ENSP00000363018,ENSP00000369757,ENSP00000375730,ENSP00000378163,ENSP00000379339,ENSP00000379506,ENSP00000413436,ENSP00000416429,ENSP00000418082,ENSP00000418868…	RPL10,RPL10A,RPL13,RPL13A,RPL14,RPL15,RPL18A,RPL22,RPL26,RPL29,RPL32,RPL34,RPL37A,RPL7,RPL7A,RPLP1,RPS12,RPS16,RPS19,RPS23,RPS25,RPS26,RPS29,RPS3A,RPS4X,RPS5,RPS6,RPS7,SRP14
GO:0072599	establishment of protein localization to endoplasmic reticulum	30	105	1.2e-31	ENSP00000222247,ENSP00000230050,ENSP00000251453,ENSP00000264710,ENSP00000267884,ENSP00000296674,ENSP00000307889,ENSP00000309334,ENSP00000339095,ENSP00000339795,ENSP00000346037,ENSP00000346050,ENSP00000346088,ENSP00000348849,ENSP00000361076,ENSP00000362744,ENSP00000363018,ENSP00000369757,ENSP00000375730,ENSP00000378163,ENSP00000379339,ENSP00000379506,ENSP00000413436,ENSP00000416429,ENSP00000418082…	RAB10,RPL10,RPL10A,RPL13,RPL13A,RPL14,RPL15,RPL18A,RPL22,RPL26,RPL29,RPL32,RPL34,RPL37A,RPL7,RPL7A,RPLP1,RPS12,RPS16,RPS19,RPS23,RPS25,RPS26,RPS29,RPS3A,RPS4X,RPS5,RPS6,RPS7,SRP14
GO:0006413	translational initiation	31	142	1.85e-30	ENSP00000222247,ENSP00000230050,ENSP00000251453,ENSP00000296674,ENSP00000307889,ENSP00000309334,ENSP00000326381,ENSP00000339095,ENSP00000339795,ENSP00000346037,ENSP00000346050,ENSP00000346088,ENSP00000348849,ENSP00000358140,ENSP00000361076,ENSP00000362744,ENSP00000363018,ENSP00000363574,ENSP00000369757,ENSP00000375730,ENSP00000378163,ENSP00000379339,ENSP00000379506,ENSP00000413436,ENSP00000416429…	EIF3A,EIF4A2,EIF6,RPL10,RPL10A,RPL13,RPL13A,RPL14,RPL15,RPL18A,RPL22,RPL26,RPL29,RPL32,RPL34,RPL37A,RPL7,RPL7A,RPLP1,RPS12,RPS16,RPS19,RPS23,RPS25,RPS26,RPS29,RPS3A,RPS4X,RPS5,RPS6,RPS7
GO:0006612	protein targeting to membrane	30	132	6.37e-30	ENSP00000222247,ENSP00000230050,ENSP00000251453,ENSP00000267884,ENSP00000296674,ENSP00000307889,ENSP00000309334,ENSP00000312734,ENSP00000339095,ENSP00000339795,ENSP00000346037,ENSP00000346050,ENSP00000346088,ENSP00000348849,ENSP00000361076,ENSP00000362744,ENSP00000363018,ENSP00000369757,ENSP00000375730,ENSP00000378163,ENSP00000379339,ENSP00000379506,ENSP00000413436,ENSP00000416429,ENSP00000418082…	RAB8B,RPL10,RPL10A,RPL13,RPL13A,RPL14,RPL15,RPL18A,RPL22,RPL26,RPL29,RPL32,RPL34,RPL37A,RPL7,RPL7A,RPLP1,RPS12,RPS16,RPS19,RPS23,RPS25,RPS26,RPS29,RPS3A,RPS4X,RPS5,RPS6,RPS7,SRP14
GO:0000184	nuclear-transcribed mRNA catabolic process, nonsense-mediated decay	28	118	2.73e-28	ENSP00000222247,ENSP00000230050,ENSP00000251453,ENSP00000296674,ENSP00000307889,ENSP00000309334,ENSP00000339095,ENSP00000339795,ENSP00000346037,ENSP00000346050,ENSP00000346088,ENSP00000348849,ENSP00000361076,ENSP00000362744,ENSP00000363018,ENSP00000369757,ENSP00000375730,ENSP00000378163,ENSP00000379339,ENSP00000379506,ENSP00000413436,ENSP00000416429,ENSP00000418082,ENSP00000418868,ENSP00000435096…	RPL10,RPL10A,RPL13,RPL13A,RPL14,RPL15,RPL18A,RPL22,RPL26,RPL29,RPL32,RPL34,RPL37A,RPL7,RPL7A,RPLP1,RPS12,RPS16,RPS19,RPS23,RPS25,RPS26,RPS29,RPS3A,RPS4X,RPS5,RPS6,RPS7
GO:0090150	establishment of protein localization to membrane	31	217	1.33e-25	ENSP00000222247,ENSP00000230050,ENSP00000251453,ENSP00000264710,ENSP00000267884,ENSP00000296674,ENSP00000307889,ENSP00000309334,ENSP00000312734,ENSP00000339095,ENSP00000339795,ENSP00000346037,ENSP00000346050,ENSP00000346088,ENSP00000348849,ENSP00000361076,ENSP00000362744,ENSP00000363018,ENSP00000369757,ENSP00000375730,ENSP00000378163,ENSP00000379339,ENSP00000379506,ENSP00000413436,ENSP00000416429…	RAB10,RAB8B,RPL10,RPL10A,RPL13,RPL13A,RPL14,RPL15,RPL18A,RPL22,RPL26,RPL29,RPL32,RPL34,RPL37A,RPL7,RPL7A,RPLP1,RPS12,RPS16,RPS19,RPS23,RPS25,RPS26,RPS29,RPS3A,RPS4X,RPS5,RPS6,RPS7,SRP14
GO:0000956	nuclear-transcribed mRNA catabolic process	29	191	1.55e-24	ENSP00000222247,ENSP00000225792,ENSP00000230050,ENSP00000251453,ENSP00000296674,ENSP00000307889,ENSP00000309334,ENSP00000339095,ENSP00000339795,ENSP00000346037,ENSP00000346050,ENSP00000346088,ENSP00000348849,ENSP00000361076,ENSP00000362744,ENSP00000363018,ENSP00000369757,ENSP00000375730,ENSP00000378163,ENSP00000379339,ENSP00000379506,ENSP00000413436,ENSP00000416429,ENSP00000418082,ENSP00000418868…	DDX5,RPL10,RPL10A,RPL13,RPL13A,RPL14,RPL15,RPL18A,RPL22,RPL26,RPL29,RPL32,RPL34,RPL37A,RPL7,RPL7A,RPLP1,RPS12,RPS16,RPS19,RPS23,RPS25,RPS26,RPS29,RPS3A,RPS4X,RPS5,RPS6,RPS7
GO:0006518	peptide metabolic process	39	497	6.16e-24	ENSP00000217131,ENSP00000222247,ENSP00000228740,ENSP00000230050,ENSP00000251453,ENSP00000275428,ENSP00000296674,ENSP00000299427,ENSP00000307889,ENSP00000309334,ENSP00000326381,ENSP00000339095,ENSP00000339795,ENSP00000345968,ENSP00000346037,ENSP00000346050,ENSP00000346088,ENSP00000348849,ENSP00000358140,ENSP00000361076,ENSP00000362744,ENSP00000363018,ENSP00000363574,ENSP00000369757,ENSP00000375730…	CTSZ,EEF1B2,EIF3A,EIF4A2,EIF6,GGCT,GSTP1,HAGH,LTA4H,PGLYRP2,RPL10,RPL10A,RPL13,RPL13A,RPL14,RPL15,RPL18A,RPL22,RPL26,RPL29,RPL32,RPL34,RPL37A,RPL7,RPL7A,RPLP1,RPS12,RPS16,RPS19,RPS23,RPS25,RPS26,RPS29,RPS3A,RPS4X,RPS5,RPS6,RPS7,TPP1
GO:0006401	RNA catabolic process	30	237	1.83e-23	ENSP00000222247,ENSP00000225792,ENSP00000230050,ENSP00000251453,ENSP00000296674,ENSP00000307889,ENSP00000309334,ENSP00000339095,ENSP00000339795,ENSP00000346037,ENSP00000346050,ENSP00000346088,ENSP00000346762,ENSP00000348849,ENSP00000361076,ENSP00000362744,ENSP00000363018,ENSP00000369757,ENSP00000375730,ENSP00000378163,ENSP00000379339,ENSP00000379506,ENSP00000413436,ENSP00000416429,ENSP00000418082…	DDX5,RPL10,RPL10A,RPL13,RPL13A,RPL14,RPL15,RPL18A,RPL22,RPL26,RPL29,RPL32,RPL34,RPL37A,RPL7,RPL7A,RPLP1,RPS12,RPS16,RPS19,RPS23,RPS25,RPS26,RPS29,RPS3A,RPS4X,RPS5,RPS6,RPS7,SND1
GO:0072594	establishment of protein localization to organelle	35	396	6.44e-23	ENSP00000221418,ENSP00000222247,ENSP00000230050,ENSP00000251453,ENSP00000264710,ENSP00000267884,ENSP00000296674,ENSP00000307889,ENSP00000309334,ENSP00000312734,ENSP00000339095,ENSP00000339795,ENSP00000346037,ENSP00000346050,ENSP00000346088,ENSP00000348849,ENSP00000355627,ENSP00000361076,ENSP00000362744,ENSP00000363018,ENSP00000369757,ENSP00000375730,ENSP00000378163,ENSP00000379339,ENSP00000379506…	AGT,ECH1,H2AFY,HK1,RAB10,RAB8B,RPL10,RPL10A,RPL13,RPL13A,RPL14,RPL15,RPL18A,RPL22,RPL26,RPL29,RPL32,RPL34,RPL37A,RPL7,RPL7A,RPLP1,RPS12,RPS16,RPS19,RPS23,RPS25,RPS26,RPS29,RPS3A,RPS4X,RPS5,RPS6,RPS7,SRP14
GO:0043043	peptide biosynthetic process	34	386	3.5e-22	ENSP00000222247,ENSP00000230050,ENSP00000251453,ENSP00000275428,ENSP00000296674,ENSP00000307889,ENSP00000309334,ENSP00000326381,ENSP00000339095,ENSP00000339795,ENSP00000346037,ENSP00000346050,ENSP00000346088,ENSP00000348849,ENSP00000358140,ENSP00000361076,ENSP00000362744,ENSP00000363018,ENSP00000363574,ENSP00000369757,ENSP00000375730,ENSP00000376056,ENSP00000378163,ENSP00000379339,ENSP00000379506…	EEF1B2,EIF3A,EIF4A2,EIF6,GGCT,HAGH,RPL10,RPL10A,RPL13,RPL13A,RPL14,RPL15,RPL18A,RPL22,RPL26,RPL29,RPL32,RPL34,RPL37A,RPL7,RPL7A,RPLP1,RPS12,RPS16,RPS19,RPS23,RPS25,RPS26,RPS29,RPS3A,RPS4X,RPS5,RPS6,RPS7
GO:0016071	mRNA metabolic process	41	667	1.17e-21	ENSP00000216832,ENSP00000222247,ENSP00000225792,ENSP00000230050,ENSP00000246194,ENSP00000251453,ENSP00000263697,ENSP00000265866,ENSP00000283179,ENSP00000296674,ENSP00000307889,ENSP00000309334,ENSP00000325376,ENSP00000339095,ENSP00000339795,ENSP00000346037,ENSP00000346050,ENSP00000346088,ENSP00000348849,ENSP00000352438,ENSP00000358635,ENSP00000360532,ENSP00000361076,ENSP00000362744,ENSP00000362820…	CDC5L,DDX17,DDX5,DNAJC8,HNRNPH3,HNRNPM,HNRNPU,PCBP2,PNN,RALY,RPL10,RPL10A,RPL13,RPL13A,RPL14,RPL15,RPL18A,RPL22,RPL26,RPL29,RPL32,RPL34,RPL37A,RPL7,RPL7A,RPLP1,RPS12,RPS16,RPS19,RPS23,RPS25,RPS26,RPS29,RPS3A,RPS4X,RPS5,RPS6,RPS7,SNRPB,SRSF3,SYNCRIP
GO:0006605	protein targeting	31	318	2.64e-21	ENSP00000221418,ENSP00000222247,ENSP00000230050,ENSP00000251453,ENSP00000267884,ENSP00000296674,ENSP00000307889,ENSP00000309334,ENSP00000312734,ENSP00000339095,ENSP00000339795,ENSP00000346037,ENSP00000346050,ENSP00000346088,ENSP00000348849,ENSP00000361076,ENSP00000362744,ENSP00000363018,ENSP00000369757,ENSP00000375730,ENSP00000378163,ENSP00000379339,ENSP00000379506,ENSP00000413436,ENSP00000416429…	ECH1,RAB8B,RPL10,RPL10A,RPL13,RPL13A,RPL14,RPL15,RPL18A,RPL22,RPL26,RPL29,RPL32,RPL34,RPL37A,RPL7,RPL7A,RPLP1,RPS12,RPS16,RPS19,RPS23,RPS25,RPS26,RPS29,RPS3A,RPS4X,RPS5,RPS6,RPS7,SRP14
GO:0034655	nucleobase-containing compound catabolic process	33	394	6.6e-21	ENSP00000222247,ENSP00000225792,ENSP00000230050,ENSP00000251453,ENSP00000296674,ENSP00000304229,ENSP00000307889,ENSP00000309334,ENSP00000339095,ENSP00000339795,ENSP00000346037,ENSP00000346050,ENSP00000346088,ENSP00000346762,ENSP00000348849,ENSP00000361076,ENSP00000362744,ENSP00000363018,ENSP00000369757,ENSP00000375730,ENSP00000378163,ENSP00000378669,ENSP00000379339,ENSP00000379506,ENSP00000402103…	ALDOA,DDX5,HINT1,HK1,RPL10,RPL10A,RPL13,RPL13A,RPL14,RPL15,RPL18A,RPL22,RPL26,RPL29,RPL32,RPL34,RPL37A,RPL7,RPL7A,RPLP1,RPS12,RPS16,RPS19,RPS23,RPS25,RPS26,RPS29,RPS3A,RPS4X,RPS5,RPS6,RPS7,SND1
GO:0006412	translation	32	362	6.72e-21	ENSP00000222247,ENSP00000230050,ENSP00000251453,ENSP00000296674,ENSP00000307889,ENSP00000309334,ENSP00000326381,ENSP00000339095,ENSP00000339795,ENSP00000346037,ENSP00000346050,ENSP00000346088,ENSP00000348849,ENSP00000358140,ENSP00000361076,ENSP00000362744,ENSP00000363018,ENSP00000363574,ENSP00000369757,ENSP00000375730,ENSP00000376056,ENSP00000378163,ENSP00000379339,ENSP00000379506,ENSP00000413436…	EEF1B2,EIF3A,EIF4A2,EIF6,RPL10,RPL10A,RPL13,RPL13A,RPL14,RPL15,RPL18A,RPL22,RPL26,RPL29,RPL32,RPL34,RPL37A,RPL7,RPL7A,RPLP1,RPS12,RPS16,RPS19,RPS23,RPS25,RPS26,RPS29,RPS3A,RPS4X,RPS5,RPS6,RPS7
GO:0019439	aromatic compound catabolic process	34	453	3.2e-20	ENSP00000222247,ENSP00000222381,ENSP00000225792,ENSP00000230050,ENSP00000251453,ENSP00000296674,ENSP00000304229,ENSP00000307889,ENSP00000309334,ENSP00000339095,ENSP00000339795,ENSP00000346037,ENSP00000346050,ENSP00000346088,ENSP00000346762,ENSP00000348849,ENSP00000361076,ENSP00000362744,ENSP00000363018,ENSP00000369757,ENSP00000375730,ENSP00000378163,ENSP00000378669,ENSP00000379339,ENSP00000379506…	ALDOA,DDX5,HINT1,HK1,PON1,RPL10,RPL10A,RPL13,RPL13A,RPL14,RPL15,RPL18A,RPL22,RPL26,RPL29,RPL32,RPL34,RPL37A,RPL7,RPL7A,RPLP1,RPS12,RPS16,RPS19,RPS23,RPS25,RPS26,RPS29,RPS3A,RPS4X,RPS5,RPS6,RPS7,SND1
GO:0043603	cellular amide metabolic process	40	732	1.89e-19	ENSP00000217131,ENSP00000222247,ENSP00000228740,ENSP00000230050,ENSP00000251453,ENSP00000275428,ENSP00000296674,ENSP00000299427,ENSP00000307889,ENSP00000309334,ENSP00000326381,ENSP00000339095,ENSP00000339795,ENSP00000345968,ENSP00000346037,ENSP00000346050,ENSP00000346088,ENSP00000348849,ENSP00000358140,ENSP00000361076,ENSP00000362744,ENSP00000363018,ENSP00000363574,ENSP00000369757,ENSP00000375730…	CTSZ,DBI,EEF1B2,EIF3A,EIF4A2,EIF6,GGCT,GSTP1,HAGH,LTA4H,PGLYRP2,RPL10,RPL10A,RPL13,RPL13A,RPL14,RPL15,RPL18A,RPL22,RPL26,RPL29,RPL32,RPL34,RPL37A,RPL7,RPL7A,RPLP1,RPS12,RPS16,RPS19,RPS23,RPS25,RPS26,RPS29,RPS3A,RPS4X,RPS5,RPS6,RPS7,TPP1
GO:0033365	protein localization to organelle	38	649	2.32e-19	ENSP00000221418,ENSP00000222247,ENSP00000230050,ENSP00000251453,ENSP00000264010,ENSP00000264380,ENSP00000264710,ENSP00000267884,ENSP00000283179,ENSP00000296674,ENSP00000307889,ENSP00000309334,ENSP00000312734,ENSP00000339095,ENSP00000339795,ENSP00000346037,ENSP00000346050,ENSP00000346088,ENSP00000348849,ENSP00000355627,ENSP00000361076,ENSP00000362744,ENSP00000363018,ENSP00000369757,ENSP00000375730…	AGT,CTCF,ECH1,H2AFY,HK1,HNRNPU,PIKFYVE,RAB10,RAB8B,RPL10,RPL10A,RPL13,RPL13A,RPL14,RPL15,RPL18A,RPL22,RPL26,RPL29,RPL32,RPL34,RPL37A,RPL7,RPL7A,RPLP1,RPS12,RPS16,RPS19,RPS23,RPS25,RPS26,RPS29,RPS3A,RPS4X,RPS5,RPS6,RPS7,SRP14
GO:0002181	cytoplasmic translation	15	57	1.63e-15	ENSP00000222247,ENSP00000296674,ENSP00000309334,ENSP00000339095,ENSP00000339795,ENSP00000346037,ENSP00000346050,ENSP00000346088,ENSP00000348849,ENSP00000358140,ENSP00000363018,ENSP00000379339,ENSP00000416429,ENSP00000418868,ENSP00000463784	EIF3A,RPL10A,RPL15,RPL18A,RPL22,RPL26,RPL29,RPL32,RPL7,RPLP1,RPS23,RPS26,RPS29,RPS3A,RPS7
GO:0044248	cellular catabolic process	51	1646	3.22e-15	ENSP00000168216,ENSP00000217131,ENSP00000221418,ENSP00000222247,ENSP00000222381,ENSP00000225792,ENSP00000228740,ENSP00000230050,ENSP00000236671,ENSP00000251453,ENSP00000296674,ENSP00000299427,ENSP00000301522,ENSP00000304229,ENSP00000307889,ENSP00000309334,ENSP00000310129,ENSP00000339095,ENSP00000339795,ENSP00000342026,ENSP00000346037,ENSP00000346050,ENSP00000346088,ENSP00000346762,ENSP00000348849…	ALDOA,CTSD,CTSZ,DDX5,ECH1,ECHS1,HAGH,HINT1,HK1,HSD17B10,LTA4H,NUB1,PCBP2,PON1,PRDX2,PRDX6,PSMA1,PSMB8,PSMD2,RPL10,RPL10A,RPL13,RPL13A,RPL14,RPL15,RPL18A,RPL22,RPL26,RPL29,RPL32,RPL34,RPL37A,RPL7,RPL7A,RPLP1,RPS12,RPS16,RPS19,RPS23,RPS25,RPS26,RPS29,RPS3A,RPS4X,RPS5,RPS6,RPS7,S100A8,S100A9,SND1,TPP1
GO:1901575	organic substance catabolic process	50	1609	6.32e-15	ENSP00000168216,ENSP00000217131,ENSP00000221418,ENSP00000222247,ENSP00000222381,ENSP00000225792,ENSP00000228740,ENSP00000230050,ENSP00000236671,ENSP00000251453,ENSP00000260402,ENSP00000296674,ENSP00000299427,ENSP00000304229,ENSP00000307889,ENSP00000309334,ENSP00000310129,ENSP00000339095,ENSP00000339795,ENSP00000342026,ENSP00000345968,ENSP00000346037,ENSP00000346050,ENSP00000346088,ENSP00000346762…	ALDOA,CTSD,CTSZ,DDX5,ECH1,ECHS1,HAGH,HINT1,HK1,HSD17B10,LTA4H,NUB1,PCBP2,PGLYRP2,PLCB2,PON1,PRDX6,PSMA1,PSMB8,PSMD2,RPL10,RPL10A,RPL13,RPL13A,RPL14,RPL15,RPL18A,RPL22,RPL26,RPL29,RPL32,RPL34,RPL37A,RPL7,RPL7A,RPLP1,RPS12,RPS16,RPS19,RPS23,RPS25,RPS26,RPS29,RPS3A,RPS4X,RPS5,RPS6,RPS7,SND1,TPP1
GO:0009057	macromolecule catabolic process	39	970	1.2e-14	ENSP00000217131,ENSP00000222247,ENSP00000225792,ENSP00000230050,ENSP00000236671,ENSP00000251453,ENSP00000296674,ENSP00000299427,ENSP00000307889,ENSP00000309334,ENSP00000310129,ENSP00000339095,ENSP00000339795,ENSP00000345968,ENSP00000346037,ENSP00000346050,ENSP00000346088,ENSP00000346762,ENSP00000348849,ENSP00000352438,ENSP00000361076,ENSP00000362744,ENSP00000363018,ENSP00000364016,ENSP00000369757…	CTSD,CTSZ,DDX5,NUB1,PCBP2,PGLYRP2,PSMA1,PSMB8,PSMD2,RPL10,RPL10A,RPL13,RPL13A,RPL14,RPL15,RPL18A,RPL22,RPL26,RPL29,RPL32,RPL34,RPL37A,RPL7,RPL7A,RPLP1,RPS12,RPS16,RPS19,RPS23,RPS25,RPS26,RPS29,RPS3A,RPS4X,RPS5,RPS6,RPS7,SND1,TPP1
GO:0009056	catabolic process	53	1859	1.79e-14	ENSP00000168216,ENSP00000217131,ENSP00000221418,ENSP00000222247,ENSP00000222381,ENSP00000225792,ENSP00000228740,ENSP00000230050,ENSP00000236671,ENSP00000251453,ENSP00000260402,ENSP00000296674,ENSP00000299427,ENSP00000301522,ENSP00000304229,ENSP00000307889,ENSP00000309334,ENSP00000310129,ENSP00000339095,ENSP00000339795,ENSP00000342026,ENSP00000345968,ENSP00000346037,ENSP00000346050,ENSP00000346088…	ALDOA,CTSD,CTSZ,DDX5,ECH1,ECHS1,HAGH,HINT1,HK1,HSD17B10,LTA4H,NUB1,PCBP2,PGLYRP2,PLCB2,PON1,PRDX2,PRDX6,PSMA1,PSMB8,PSMD2,RPL10,RPL10A,RPL13,RPL13A,RPL14,RPL15,RPL18A,RPL22,RPL26,RPL29,RPL32,RPL34,RPL37A,RPL7,RPL7A,RPLP1,RPS12,RPS16,RPS19,RPS23,RPS25,RPS26,RPS29,RPS3A,RPS4X,RPS5,RPS6,RPS7,S100A8,S100A9,SND1,TPP1
GO:0044265	cellular macromolecule catabolic process	36	842	3.41e-14	ENSP00000217131,ENSP00000222247,ENSP00000225792,ENSP00000230050,ENSP00000251453,ENSP00000296674,ENSP00000307889,ENSP00000309334,ENSP00000310129,ENSP00000339095,ENSP00000339795,ENSP00000346037,ENSP00000346050,ENSP00000346088,ENSP00000346762,ENSP00000348849,ENSP00000352438,ENSP00000361076,ENSP00000362744,ENSP00000363018,ENSP00000364016,ENSP00000369757,ENSP00000375730,ENSP00000378163,ENSP00000379339…	CTSZ,DDX5,NUB1,PCBP2,PSMA1,PSMB8,PSMD2,RPL10,RPL10A,RPL13,RPL13A,RPL14,RPL15,RPL18A,RPL22,RPL26,RPL29,RPL32,RPL34,RPL37A,RPL7,RPL7A,RPLP1,RPS12,RPS16,RPS19,RPS23,RPS25,RPS26,RPS29,RPS3A,RPS4X,RPS5,RPS6,RPS7,SND1
GO:0010629	negative regulation of gene expression	49	1670	1.17e-13	ENSP00000217131,ENSP00000222247,ENSP00000225792,ENSP00000230050,ENSP00000251453,ENSP00000254657,ENSP00000254722,ENSP00000264010,ENSP00000283179,ENSP00000296674,ENSP00000307889,ENSP00000308405,ENSP00000309334,ENSP00000318195,ENSP00000332706,ENSP00000339095,ENSP00000339566,ENSP00000339795,ENSP00000346037,ENSP00000346050,ENSP00000346088,ENSP00000346762,ENSP00000348849,ENSP00000352257,ENSP00000355627…	AGT,CTCF,CTSZ,DDX17,DDX5,EIF6,H2AFV,H2AFX,H2AFY,HIST1H1C,HIST1H3A,HIST2H3A,HNRNPU,LRRFIP1,NCL,PER2,PURA,RPL10,RPL10A,RPL13,RPL13A,RPL14,RPL15,RPL18A,RPL22,RPL26,RPL29,RPL32,RPL34,RPL37A,RPL7,RPL7A,RPLP1,RPS12,RPS16,RPS19,RPS23,RPS25,RPS26,RPS29,RPS3A,RPS4X,RPS5,RPS6,RPS7,SERPINF1,SND1,SYNCRIP,XRCC6
GO:0006886	intracellular protein transport	35	836	1.64e-13	ENSP00000221418,ENSP00000222247,ENSP00000230050,ENSP00000251453,ENSP00000263354,ENSP00000267884,ENSP00000296674,ENSP00000307889,ENSP00000309334,ENSP00000312734,ENSP00000339095,ENSP00000339795,ENSP00000346037,ENSP00000346050,ENSP00000346088,ENSP00000348849,ENSP00000355627,ENSP00000361076,ENSP00000362744,ENSP00000362820,ENSP00000363018,ENSP00000363574,ENSP00000369757,ENSP00000375730,ENSP00000378163…	AGT,ECH1,EIF6,NAPA,RAB8B,RPL10,RPL10A,RPL13,RPL13A,RPL14,RPL15,RPL18A,RPL22,RPL26,RPL29,RPL32,RPL34,RPL37A,RPL7,RPL7A,RPLP1,RPS12,RPS16,RPS19,RPS23,RPS25,RPS26,RPS29,RPS3A,RPS4X,RPS5,RPS6,RPS7,SRP14,SRSF3
GO:0045184	establishment of protein localization	45	1467	4.83e-13	ENSP00000221418,ENSP00000222247,ENSP00000226355,ENSP00000230050,ENSP00000251453,ENSP00000263354,ENSP00000264710,ENSP00000267884,ENSP00000273398,ENSP00000285208,ENSP00000286091,ENSP00000292401,ENSP00000296674,ENSP00000307889,ENSP00000309334,ENSP00000312734,ENSP00000339095,ENSP00000339795,ENSP00000346037,ENSP00000346050,ENSP00000346088,ENSP00000348849,ENSP00000355627,ENSP00000361076,ENSP00000362744…	AFM,AGT,ATP6V1A,AZGP1,ECH1,EIF6,ENSG00000103426,H2AFY,HK1,NAPA,PDIA4,RAB10,RAB6B,RAB8B,RPL10,RPL10A,RPL13,RPL13A,RPL14,RPL15,RPL18A,RPL22,RPL26,RPL29,RPL32,RPL34,RPL37A,RPL7,RPL7A,RPLP1,RPS12,RPS16,RPS19,RPS23,RPS25,RPS26,RPS29,RPS3A,RPS4X,RPS5,RPS6,RPS7,SEC31A,SRP14,SRSF3
GO:0051234	establishment of localization	79	4248	8.41e-13	ENSP00000176763,ENSP00000207549,ENSP00000217131,ENSP00000221418,ENSP00000221957,ENSP00000222247,ENSP00000226355,ENSP00000228740,ENSP00000228825,ENSP00000230050,ENSP00000232003,ENSP00000236671,ENSP00000247153,ENSP00000251453,ENSP00000261405,ENSP00000262428,ENSP00000262455,ENSP00000263354,ENSP00000264380,ENSP00000264710,ENSP00000267884,ENSP00000273398,ENSP00000285208,ENSP00000285379,ENSP00000286091…	AFM,AGT,ALDOA,ARPC3,ATP5O,ATP6V1A,AZGP1,CA2,CCL5,CFP,COTL1,CSTB,CTSD,CTSZ,ECH1,EIF6,ENSG00000103426,ERP44,GSTP1,H2AFY,HK1,HPR,HRG,ITGB1,ITIH3,LTA4H,MNDA,NAPA,PDIA4,PIKFYVE,PLIN3,PRDX6,PSMD2,RAB10,RAB6B,RAB8B,RAC1,RPL10,RPL10A,RPL13,RPL13A,RPL14,RPL15,RPL18A,RPL22,RPL26,RPL29,RPL32,RPL34,RPL37A,RPL7,RPL7A,RPLP1,RPS12,RPS16,RPS19,RPS23,RPS25,RPS26,RPS29,RPS3A,RPS4X,RPS5,RPS6,RPS7,S100A6,S100A8,S100…
GO:0015031	protein transport	43	1391	1.64e-12	ENSP00000221418,ENSP00000222247,ENSP00000226355,ENSP00000230050,ENSP00000251453,ENSP00000263354,ENSP00000264710,ENSP00000267884,ENSP00000273398,ENSP00000285208,ENSP00000286091,ENSP00000292401,ENSP00000296674,ENSP00000307889,ENSP00000309334,ENSP00000312734,ENSP00000339095,ENSP00000339795,ENSP00000346037,ENSP00000346050,ENSP00000346088,ENSP00000348849,ENSP00000355627,ENSP00000361076,ENSP00000362744…	AFM,AGT,ATP6V1A,AZGP1,ECH1,EIF6,ENSG00000103426,NAPA,PDIA4,RAB10,RAB6B,RAB8B,RPL10,RPL10A,RPL13,RPL13A,RPL14,RPL15,RPL18A,RPL22,RPL26,RPL29,RPL32,RPL34,RPL37A,RPL7,RPL7A,RPLP1,RPS12,RPS16,RPS19,RPS23,RPS25,RPS26,RPS29,RPS3A,RPS4X,RPS5,RPS6,RPS7,SEC31A,SRP14,SRSF3
GO:0046907	intracellular transport	43	1390	1.64e-12	ENSP00000217131,ENSP00000221418,ENSP00000222247,ENSP00000230050,ENSP00000251453,ENSP00000263354,ENSP00000264380,ENSP00000264710,ENSP00000267884,ENSP00000285208,ENSP00000290299,ENSP00000296674,ENSP00000307889,ENSP00000309334,ENSP00000312734,ENSP00000339095,ENSP00000339795,ENSP00000346037,ENSP00000346050,ENSP00000346088,ENSP00000348849,ENSP00000355627,ENSP00000361076,ENSP00000362744,ENSP00000362820…	AGT,ATP5O,CTSZ,ECH1,EIF6,ENSG00000103426,NAPA,PIKFYVE,RAB10,RAB6B,RAB8B,RPL10,RPL10A,RPL13,RPL13A,RPL14,RPL15,RPL18A,RPL22,RPL26,RPL29,RPL32,RPL34,RPL37A,RPL7,RPL7A,RPLP1,RPS12,RPS16,RPS19,RPS23,RPS25,RPS26,RPS29,RPS3A,RPS4X,RPS5,RPS6,RPS7,SEC31A,SNRPB,SRP14,SRSF3
GO:0006810	transport	77	4130	2.01e-12	ENSP00000176763,ENSP00000207549,ENSP00000217131,ENSP00000221418,ENSP00000221957,ENSP00000222247,ENSP00000226355,ENSP00000228740,ENSP00000228825,ENSP00000230050,ENSP00000232003,ENSP00000236671,ENSP00000247153,ENSP00000251453,ENSP00000261405,ENSP00000262428,ENSP00000262455,ENSP00000263354,ENSP00000264380,ENSP00000264710,ENSP00000267884,ENSP00000273398,ENSP00000285208,ENSP00000285379,ENSP00000286091…	AFM,AGT,ALDOA,ARPC3,ATP5O,ATP6V1A,AZGP1,CA2,CCL5,CFP,COTL1,CSTB,CTSD,CTSZ,ECH1,EIF6,ENSG00000103426,ERP44,GSTP1,HPR,HRG,ITGB1,ITIH3,LTA4H,MNDA,NAPA,PDIA4,PIKFYVE,PLIN3,PRDX6,PSMD2,RAB10,RAB6B,RAB8B,RAC1,RPL10,RPL10A,RPL13,RPL13A,RPL14,RPL15,RPL18A,RPL22,RPL26,RPL29,RPL32,RPL34,RPL37A,RPL7,RPL7A,RPLP1,RPS12,RPS16,RPS19,RPS23,RPS25,RPS26,RPS29,RPS3A,RPS4X,RPS5,RPS6,RPS7,S100A6,S100A8,S100A9,SEC31A,…
GO:0010605	negative regulation of macromolecule metabolic process	58	2558	6.72e-12	ENSP00000012443,ENSP00000217131,ENSP00000222247,ENSP00000225792,ENSP00000230050,ENSP00000232003,ENSP00000251453,ENSP00000254480,ENSP00000254657,ENSP00000254722,ENSP00000264010,ENSP00000283179,ENSP00000291568,ENSP00000296674,ENSP00000307889,ENSP00000308405,ENSP00000309334,ENSP00000318195,ENSP00000326381,ENSP00000331544,ENSP00000332706,ENSP00000339095,ENSP00000339566,ENSP00000339795,ENSP00000346037…	AGT,CSTB,CTCF,CTSZ,DDX17,DDX5,EIF3A,EIF4A2,EIF6,FBLN1,GSTP1,H2AFV,H2AFX,H2AFY,HIST1H1C,HIST1H3A,HIST2H3A,HNRNPU,HRG,ITIH3,LRRFIP1,NCL,PER2,PPP5C,PURA,RPL10,RPL10A,RPL13,RPL13A,RPL14,RPL15,RPL18A,RPL22,RPL26,RPL29,RPL32,RPL34,RPL37A,RPL7,RPL7A,RPLP1,RPS12,RPS16,RPS19,RPS23,RPS25,RPS26,RPS29,RPS3A,RPS4X,RPS5,RPS6,RPS7,SERPINF1,SMARCC1,SND1,SYNCRIP,XRCC6
GO:0034613	cellular protein localization	41	1367	1.81e-11	ENSP00000221418,ENSP00000222247,ENSP00000230050,ENSP00000251453,ENSP00000263354,ENSP00000264010,ENSP00000264380,ENSP00000264710,ENSP00000267884,ENSP00000283179,ENSP00000296674,ENSP00000307889,ENSP00000309334,ENSP00000312734,ENSP00000339095,ENSP00000339795,ENSP00000346037,ENSP00000346050,ENSP00000346088,ENSP00000348849,ENSP00000355627,ENSP00000361076,ENSP00000362744,ENSP00000362820,ENSP00000363018…	AGT,CTCF,ECH1,EIF6,H2AFY,HK1,HNRNPU,NAPA,PIKFYVE,RAB10,RAB8B,RPL10,RPL10A,RPL13,RPL13A,RPL14,RPL15,RPL18A,RPL22,RPL26,RPL29,RPL32,RPL34,RPL37A,RPL7,RPL7A,RPLP1,RPS12,RPS16,RPS19,RPS23,RPS25,RPS26,RPS29,RPS3A,RPS4X,RPS5,RPS6,RPS7,SRP14,SRSF3
GO:0008104	protein localization	49	1966	3.88e-11	ENSP00000221418,ENSP00000222247,ENSP00000226355,ENSP00000230050,ENSP00000251453,ENSP00000263354,ENSP00000264010,ENSP00000264380,ENSP00000264710,ENSP00000267884,ENSP00000273398,ENSP00000283179,ENSP00000285208,ENSP00000286091,ENSP00000292401,ENSP00000296674,ENSP00000307889,ENSP00000309334,ENSP00000312734,ENSP00000339095,ENSP00000339795,ENSP00000346037,ENSP00000346050,ENSP00000346088,ENSP00000348849…	AFM,AGT,ATP6V1A,AZGP1,CTCF,ECH1,EIF6,ENSG00000103426,H2AFY,HK1,HNRNPU,LTBP1,NAPA,PDIA4,PIKFYVE,RAB10,RAB6B,RAB8B,RPL10,RPL10A,RPL13,RPL13A,RPL14,RPL15,RPL18A,RPL22,RPL26,RPL29,RPL32,RPL34,RPL37A,RPL7,RPL7A,RPLP1,RPS12,RPS16,RPS19,RPS23,RPS25,RPS26,RPS29,RPS3A,RPS4X,RPS5,RPS6,RPS7,SEC31A,SRP14,SRSF3
GO:0071705	nitrogen compound transport	45	1690	5.01e-11	ENSP00000221418,ENSP00000222247,ENSP00000226355,ENSP00000230050,ENSP00000232003,ENSP00000251453,ENSP00000263354,ENSP00000264710,ENSP00000267884,ENSP00000273398,ENSP00000285208,ENSP00000286091,ENSP00000292401,ENSP00000296674,ENSP00000307889,ENSP00000309334,ENSP00000312734,ENSP00000339095,ENSP00000339795,ENSP00000346037,ENSP00000346050,ENSP00000346088,ENSP00000348849,ENSP00000355627,ENSP00000360671…	AFM,AGT,ATP6V1A,AZGP1,ECH1,EIF6,ENSG00000103426,HRG,NAPA,PDIA4,RAB10,RAB6B,RAB8B,RPL10,RPL10A,RPL13,RPL13A,RPL14,RPL15,RPL18A,RPL22,RPL26,RPL29,RPL32,RPL34,RPL37A,RPL7,RPL7A,RPLP1,RPS12,RPS16,RPS19,RPS23,RPS25,RPS26,RPS29,RPS3A,RPS4X,RPS5,RPS6,RPS7,SEC31A,SLC25A5,SRP14,SRSF3
GO:0034641	cellular nitrogen compound metabolic process	84	5126	6.99e-11	ENSP00000012443,ENSP00000168216,ENSP00000216038,ENSP00000216832,ENSP00000217131,ENSP00000221801,ENSP00000222247,ENSP00000225792,ENSP00000228740,ENSP00000230050,ENSP00000246194,ENSP00000251453,ENSP00000254480,ENSP00000254657,ENSP00000263697,ENSP00000264010,ENSP00000265866,ENSP00000270776,ENSP00000273398,ENSP00000275428,ENSP00000283179,ENSP00000286621,ENSP00000290299,ENSP00000292401,ENSP00000296674…	ADK,ALDOA,ATP5O,ATP6V1A,AZGP1,C9orf142,CDC5L,CHD4,CTCF,CTSZ,DBI,DDX17,DDX5,DNAJC8,EEF1B2,EIF3A,EIF4A2,EIF6,EWSR1,FANCI,FBL,G3BP1,GGCT,GSTP1,H2AFX,HAGH,HINT1,HK1,HNRNPH3,HNRNPM,HNRNPU,HSD17B10,LDHB,LRRFIP1,LTA4H,MNDA,PCBP2,PER2,PGD,PGLYRP2,PNN,PPP5C,PRPS1,PURA,RALY,RBM3,RPL10,RPL10A,RPL13,RPL13A,RPL14,RPL15,RPL18A,RPL22,RPL26,RPL29,RPL32,RPL34,RPL37A,RPL7,RPL7A,RPLP1,RPS12,RPS16,RPS19,RPS23,RPS25,…
GO:1901566	organonitrogen compound biosynthetic process	40	1370	7.87e-11	ENSP00000222247,ENSP00000230050,ENSP00000251453,ENSP00000275428,ENSP00000286621,ENSP00000290299,ENSP00000296674,ENSP00000307889,ENSP00000309334,ENSP00000326381,ENSP00000339095,ENSP00000339795,ENSP00000346037,ENSP00000346050,ENSP00000346088,ENSP00000348849,ENSP00000358140,ENSP00000361076,ENSP00000361512,ENSP00000362744,ENSP00000363018,ENSP00000363574,ENSP00000369757,ENSP00000375730,ENSP00000376056…	ADK,ALDOA,ATP5O,EEF1B2,EIF3A,EIF4A2,EIF6,GGCT,GSTP1,HAGH,HK1,PRPS1,RPL10,RPL10A,RPL13,RPL13A,RPL14,RPL15,RPL18A,RPL22,RPL26,RPL29,RPL32,RPL34,RPL37A,RPL7,RPL7A,RPLP1,RPS12,RPS16,RPS19,RPS23,RPS25,RPS26,RPS29,RPS3A,RPS4X,RPS5,RPS6,RPS7
GO:0051179	localization	84	5233	2.1e-10	ENSP00000176763,ENSP00000207549,ENSP00000217131,ENSP00000221418,ENSP00000221801,ENSP00000221957,ENSP00000222247,ENSP00000226355,ENSP00000228740,ENSP00000228825,ENSP00000230050,ENSP00000232003,ENSP00000236671,ENSP00000247153,ENSP00000251453,ENSP00000261405,ENSP00000262428,ENSP00000262455,ENSP00000263354,ENSP00000264010,ENSP00000264380,ENSP00000264710,ENSP00000267884,ENSP00000273398,ENSP00000283179…	AFM,AGT,ALDOA,ARPC3,ATP5O,ATP6V1A,AZGP1,CA2,CCL5,CFP,COTL1,CSTB,CTCF,CTSD,CTSZ,ECH1,EIF6,ENSG00000103426,ERP44,FBL,GSTP1,H2AFY,HK1,HNRNPU,HPR,HRG,ITGB1,ITIH3,LTA4H,LTBP1,MNDA,NAPA,PDIA4,PIKFYVE,PLIN3,PRDX6,PSMD2,RAB10,RAB6B,RAB8B,RAC1,RPL10,RPL10A,RPL13,RPL13A,RPL14,RPL15,RPL18A,RPL22,RPL26,RPL29,RPL32,RPL34,RPL37A,RPL7,RPL7A,RPLP1,RPS12,RPS16,RPS19,RPS23,RPS25,RPS26,RPS29,RPS3A,RPS4X,RPS5,RPS6,R…
GO:0071704	organic substance metabolic process	117	9135	3.39e-10	ENSP00000012443,ENSP00000168216,ENSP00000176763,ENSP00000216038,ENSP00000216802,ENSP00000216832,ENSP00000217131,ENSP00000221418,ENSP00000221801,ENSP00000222247,ENSP00000222381,ENSP00000225792,ENSP00000228740,ENSP00000230050,ENSP00000236671,ENSP00000246194,ENSP00000247153,ENSP00000251453,ENSP00000254480,ENSP00000254657,ENSP00000260402,ENSP00000261211,ENSP00000261405,ENSP00000262455,ENSP00000263697…	ADK,AGT,ALDOA,ATP5O,ATP6V1A,AZGP1,C9orf142,CCL5,CDC5L,CDK17,CFP,CHD4,CTCF,CTSD,CTSZ,DBI,DDX17,DDX5,DNAJC8,ECH1,ECHS1,EEF1B2,EIF3A,EIF4A2,EIF6,ERP44,EWSR1,FANCI,FBL,FBLN1,G3BP1,GGCT,GSTP1,H2AFX,HAGH,HGFAC,HINT1,HIST1H1C,HIST1H3A,HIST2H3A,HK1,HNRNPH3,HNRNPM,HNRNPU,HSD17B10,ITGB1,ITIH3,KLKB1,LDHB,LRRFIP1,LTA4H,LTBP1,MNDA,NUB1,PCBP2,PER2,PGD,PGLYRP2,PIKFYVE,PLCB2,PNN,PON1,PPP5C,PRDX6,PRPS1,PSMA1,PSMB…
GO:0008152	metabolic process	120	9569	4.52e-10	ENSP00000012443,ENSP00000168216,ENSP00000176763,ENSP00000216038,ENSP00000216802,ENSP00000216832,ENSP00000217131,ENSP00000221418,ENSP00000221801,ENSP00000222247,ENSP00000222381,ENSP00000225792,ENSP00000228740,ENSP00000230050,ENSP00000236671,ENSP00000246194,ENSP00000247153,ENSP00000251453,ENSP00000254480,ENSP00000254657,ENSP00000260402,ENSP00000261211,ENSP00000261405,ENSP00000262455,ENSP00000263697…	ADK,AGT,ALDOA,ATP5O,ATP6V1A,AZGP1,C9orf142,CCL5,CDC5L,CDK17,CFP,CHD4,CTCF,CTSD,CTSZ,DBI,DDX17,DDX5,DNAJC8,ECH1,ECHS1,EEF1B2,EIF3A,EIF4A2,EIF6,ERP44,EWSR1,FANCI,FBL,FBLN1,G3BP1,GGCT,GSTP1,H2AFX,HAGH,HGFAC,HINT1,HIST1H1C,HIST1H3A,HIST2H3A,HK1,HNRNPH3,HNRNPM,HNRNPU,HSD17B10,ITGB1,ITIH3,KLKB1,LDHB,LRRFIP1,LTA4H,LTBP1,MNDA,NUB1,PCBP2,PDIA4,PER2,PGD,PGLYRP2,PIKFYVE,PLCB2,PNN,PON1,PPP5C,PRDX2,PRDX6,PRPS…
GO:0044237	cellular metabolic process	114	8797	5.14e-10	ENSP00000012443,ENSP00000168216,ENSP00000176763,ENSP00000216038,ENSP00000216802,ENSP00000216832,ENSP00000217131,ENSP00000221418,ENSP00000221801,ENSP00000222247,ENSP00000222381,ENSP00000225792,ENSP00000228740,ENSP00000230050,ENSP00000236671,ENSP00000246194,ENSP00000251453,ENSP00000254480,ENSP00000254657,ENSP00000260402,ENSP00000261211,ENSP00000262455,ENSP00000263697,ENSP00000264010,ENSP00000264380…	ADK,AGT,ALDOA,ATP5O,ATP6V1A,AZGP1,C9orf142,CCL5,CDC5L,CDK17,CHD4,CTCF,CTSD,CTSZ,DBI,DDX17,DDX5,DNAJC8,ECH1,ECHS1,EEF1B2,EIF3A,EIF4A2,EIF6,ERP44,EWSR1,FANCI,FBL,G3BP1,GGCT,GSTP1,H2AFX,HAGH,HINT1,HIST1H1C,HIST1H3A,HIST2H3A,HK1,HNRNPH3,HNRNPM,HNRNPU,HSD17B10,ITGB1,ITIH3,LDHB,LRRFIP1,LTA4H,LTBP1,MNDA,NUB1,PCBP2,PER2,PGD,PGLYRP2,PIKFYVE,PLCB2,PNN,PON1,PPP5C,PRDX2,PRDX6,PRPS1,PSMA1,PSMB8,PSMD2,PSME2,PU…
GO:0006807	nitrogen compound metabolic process	110	8349	8.48e-10	ENSP00000012443,ENSP00000168216,ENSP00000176763,ENSP00000216038,ENSP00000216802,ENSP00000216832,ENSP00000217131,ENSP00000221801,ENSP00000222247,ENSP00000222381,ENSP00000225792,ENSP00000228740,ENSP00000230050,ENSP00000236671,ENSP00000246194,ENSP00000247153,ENSP00000251453,ENSP00000254480,ENSP00000254657,ENSP00000261211,ENSP00000261405,ENSP00000262455,ENSP00000263697,ENSP00000264010,ENSP00000264690…	ADK,AGT,ALDOA,ATP5O,ATP6V1A,AZGP1,C9orf142,CCL5,CDC5L,CDK17,CFP,CHD4,CTCF,CTSD,CTSZ,DBI,DDX17,DDX5,DNAJC8,EEF1B2,EIF3A,EIF4A2,EIF6,ERP44,EWSR1,FANCI,FBL,FBLN1,G3BP1,GGCT,GSTP1,H2AFX,HAGH,HGFAC,HINT1,HIST1H1C,HIST1H3A,HIST2H3A,HK1,HNRNPH3,HNRNPM,HNRNPU,HSD17B10,ITIH3,KLKB1,LDHB,LRRFIP1,LTA4H,LTBP1,MNDA,NUB1,PCBP2,PER2,PGD,PGLYRP2,PNN,PON1,PPP5C,PRPS1,PSMA1,PSMB8,PSMD2,PSME2,PURA,RAC1,RALY,RBM3,RPL…
GO:1901564	organonitrogen compound metabolic process	83	5281	9.59e-10	ENSP00000012443,ENSP00000168216,ENSP00000176763,ENSP00000216802,ENSP00000217131,ENSP00000221801,ENSP00000222247,ENSP00000222381,ENSP00000228740,ENSP00000230050,ENSP00000236671,ENSP00000247153,ENSP00000251453,ENSP00000254657,ENSP00000261211,ENSP00000261405,ENSP00000262455,ENSP00000264690,ENSP00000270776,ENSP00000273398,ENSP00000275428,ENSP00000286621,ENSP00000290299,ENSP00000296674,ENSP00000299427…	ADK,AGT,ALDOA,ATP5O,ATP6V1A,CCL5,CDK17,CFP,CHD4,CTSD,CTSZ,DBI,EEF1B2,EIF3A,EIF4A2,EIF6,ERP44,FBL,FBLN1,GGCT,GSTP1,HAGH,HGFAC,HINT1,HIST1H1C,HIST1H3A,HIST2H3A,HK1,HSD17B10,ITIH3,KLKB1,LDHB,LTA4H,LTBP1,NUB1,PCBP2,PER2,PGD,PGLYRP2,PON1,PPP5C,PRPS1,PSMA1,PSMB8,PSMD2,PSME2,RAC1,RPL10,RPL10A,RPL13,RPL13A,RPL14,RPL15,RPL18A,RPL22,RPL26,RPL29,RPL32,RPL34,RPL37A,RPL7,RPL7A,RPLP1,RPS12,RPS16,RPS19,RPS23,RP…
GO:0033036	macromolecule localization	50	2268	1.43e-09	ENSP00000221418,ENSP00000221801,ENSP00000222247,ENSP00000226355,ENSP00000230050,ENSP00000251453,ENSP00000263354,ENSP00000264010,ENSP00000264380,ENSP00000264710,ENSP00000267884,ENSP00000273398,ENSP00000283179,ENSP00000285208,ENSP00000286091,ENSP00000292401,ENSP00000296674,ENSP00000307889,ENSP00000309334,ENSP00000312734,ENSP00000339095,ENSP00000339795,ENSP00000346037,ENSP00000346050,ENSP00000346088…	AFM,AGT,ATP6V1A,AZGP1,CTCF,ECH1,EIF6,ENSG00000103426,FBL,H2AFY,HK1,HNRNPU,LTBP1,NAPA,PDIA4,PIKFYVE,RAB10,RAB6B,RAB8B,RPL10,RPL10A,RPL13,RPL13A,RPL14,RPL15,RPL18A,RPL22,RPL26,RPL29,RPL32,RPL34,RPL37A,RPL7,RPL7A,RPLP1,RPS12,RPS16,RPS19,RPS23,RPS25,RPS26,RPS29,RPS3A,RPS4X,RPS5,RPS6,RPS7,SEC31A,SRP14,SRSF3
GO:0006139	nucleobase-containing compound metabolic process	75	4551	2.24e-09	ENSP00000012443,ENSP00000168216,ENSP00000216038,ENSP00000216832,ENSP00000221801,ENSP00000222247,ENSP00000225792,ENSP00000230050,ENSP00000246194,ENSP00000251453,ENSP00000254480,ENSP00000254657,ENSP00000263697,ENSP00000264010,ENSP00000265866,ENSP00000270776,ENSP00000273398,ENSP00000283179,ENSP00000286621,ENSP00000290299,ENSP00000292401,ENSP00000296674,ENSP00000300738,ENSP00000304229,ENSP00000307889…	ADK,ALDOA,ATP5O,ATP6V1A,AZGP1,C9orf142,CDC5L,CHD4,CTCF,DBI,DDX17,DDX5,DNAJC8,EIF4A2,EIF6,EWSR1,FANCI,FBL,G3BP1,H2AFX,HINT1,HK1,HNRNPH3,HNRNPM,HNRNPU,HSD17B10,LDHB,LRRFIP1,MNDA,PCBP2,PER2,PGD,PNN,PPP5C,PRPS1,PURA,RALY,RBM3,RPL10,RPL10A,RPL13,RPL13A,RPL14,RPL15,RPL18A,RPL22,RPL26,RPL29,RPL32,RPL34,RPL37A,RPL7,RPL7A,RPLP1,RPS12,RPS16,RPS19,RPS23,RPS25,RPS26,RPS29,RPS3A,RPS4X,RPS5,RPS6,RPS7,RRM1,RTCB…
GO:0048519	negative regulation of biological process	79	4953	2.24e-09	ENSP00000012443,ENSP00000217131,ENSP00000222247,ENSP00000225792,ENSP00000230050,ENSP00000232003,ENSP00000245185,ENSP00000251453,ENSP00000254480,ENSP00000254657,ENSP00000254722,ENSP00000264010,ENSP00000264690,ENSP00000283179,ENSP00000291568,ENSP00000292401,ENSP00000296674,ENSP00000301522,ENSP00000307889,ENSP00000308405,ENSP00000308753,ENSP00000309334,ENSP00000310842,ENSP00000318195,ENSP00000326381…	AGT,ARHGEF7,AZGP1,CCL5,CDC5L,CSTB,CTCF,CTSZ,DDX17,DDX5,EIF3A,EIF4A2,EIF6,FANCI,FBLN1,G3BP1,GSTP1,H2AFV,H2AFX,H2AFY,HIST1H1C,HIST1H3A,HIST2H3A,HNRNPU,HRG,ITGB1,ITIH3,KLKB1,LRRFIP1,LTBP1,MNDA,MT2A,NCL,PCBP2,PER2,PGLYRP2,PPP5C,PRDX2,PURA,RAC1,RPL10,RPL10A,RPL13,RPL13A,RPL14,RPL15,RPL18A,RPL22,RPL26,RPL29,RPL32,RPL34,RPL37A,RPL7,RPL7A,RPLP1,RPS12,RPS16,RPS19,RPS23,RPS25,RPS26,RPS29,RPS3A,RPS4X,RPS5,R…
GO:0051641	cellular localization	48	2180	4.15e-09	ENSP00000217131,ENSP00000221418,ENSP00000222247,ENSP00000230050,ENSP00000251453,ENSP00000263354,ENSP00000264010,ENSP00000264380,ENSP00000264710,ENSP00000267884,ENSP00000283179,ENSP00000285208,ENSP00000290299,ENSP00000296674,ENSP00000307889,ENSP00000309334,ENSP00000312734,ENSP00000339095,ENSP00000339795,ENSP00000346037,ENSP00000346050,ENSP00000346088,ENSP00000348461,ENSP00000348849,ENSP00000355627…	AGT,ATP5O,CTCF,CTSZ,ECH1,EIF6,ENSG00000103426,H2AFY,HK1,HNRNPU,NAPA,PIKFYVE,RAB10,RAB6B,RAB8B,RAC1,RPL10,RPL10A,RPL13,RPL13A,RPL14,RPL15,RPL18A,RPL22,RPL26,RPL29,RPL32,RPL34,RPL37A,RPL7,RPL7A,RPLP1,RPS12,RPS16,RPS19,RPS23,RPS25,RPS26,RPS29,RPS3A,RPS4X,RPS5,RPS6,RPS7,SEC31A,SNRPB,SRP14,SRSF3
GO:0044238	primary metabolic process	112	8808	4.52e-09	ENSP00000012443,ENSP00000168216,ENSP00000176763,ENSP00000216038,ENSP00000216802,ENSP00000216832,ENSP00000217131,ENSP00000221418,ENSP00000221801,ENSP00000222247,ENSP00000222381,ENSP00000225792,ENSP00000228740,ENSP00000230050,ENSP00000236671,ENSP00000246194,ENSP00000247153,ENSP00000251453,ENSP00000254480,ENSP00000254657,ENSP00000260402,ENSP00000261211,ENSP00000261405,ENSP00000262455,ENSP00000263697…	ADK,AGT,ALDOA,ATP5O,ATP6V1A,AZGP1,C9orf142,CCL5,CDC5L,CDK17,CFP,CHD4,CTCF,CTSD,CTSZ,DBI,DDX17,DDX5,DNAJC8,ECH1,ECHS1,EEF1B2,EIF3A,EIF4A2,EIF6,ERP44,EWSR1,FANCI,FBL,FBLN1,G3BP1,GSTP1,H2AFX,HGFAC,HINT1,HIST1H1C,HIST1H3A,HIST2H3A,HK1,HNRNPH3,HNRNPM,HNRNPU,HSD17B10,KLKB1,LDHB,LRRFIP1,LTA4H,LTBP1,MNDA,NUB1,PCBP2,PER2,PGD,PIKFYVE,PLCB2,PNN,PON1,PPP5C,PRDX6,PRPS1,PSMA1,PSMB8,PSMD2,PSME2,PURA,RAC1,RALY,R…
GO:0009987	cellular process	150	14652	5.21e-09	ENSP00000012443,ENSP00000168216,ENSP00000176763,ENSP00000207549,ENSP00000216038,ENSP00000216802,ENSP00000216832,ENSP00000217131,ENSP00000221418,ENSP00000221801,ENSP00000222247,ENSP00000222381,ENSP00000225792,ENSP00000228740,ENSP00000228825,ENSP00000230050,ENSP00000232003,ENSP00000236671,ENSP00000245185,ENSP00000246069,ENSP00000246194,ENSP00000247153,ENSP00000251453,ENSP00000254480,ENSP00000254657…	ADK,AGT,AHNAK,ALDOA,ARHGEF7,ARPC3,ATP5O,ATP6V1A,AZGP1,C9orf142,CA2,CCL5,CCT6A,CDC5L,CDK17,CFP,CHD4,COTL1,CRIP1,CSTB,CTCF,CTSD,CTSZ,DBI,DDX17,DDX5,DNAJC8,DSTN,ECH1,ECHS1,EEF1B2,EIF3A,EIF4A2,EIF6,ENSG00000103426,ERP44,EWSR1,FANCI,FBL,FBLN1,G3BP1,GGCT,GSTP1,H2AFV,H2AFX,H2AFY,HAGH,HINT1,HIST1H1C,HIST1H3A,HIST2H3A,HK1,HNRNPH3,HNRNPM,HNRNPU,HRG,HSD17B10,ITGB1,ITIH3,KIF21A,KLKB1,LDHB,LRRFIP1,LSP1,LTA4H,…
GO:0071702	organic substance transport	46	2040	5.21e-09	ENSP00000221418,ENSP00000222247,ENSP00000226355,ENSP00000230050,ENSP00000232003,ENSP00000251453,ENSP00000263354,ENSP00000264710,ENSP00000267884,ENSP00000273398,ENSP00000285208,ENSP00000285379,ENSP00000286091,ENSP00000292401,ENSP00000296674,ENSP00000307889,ENSP00000309334,ENSP00000312734,ENSP00000339095,ENSP00000339795,ENSP00000346037,ENSP00000346050,ENSP00000346088,ENSP00000348849,ENSP00000355627…	AFM,AGT,ATP6V1A,AZGP1,CA2,ECH1,EIF6,ENSG00000103426,HRG,NAPA,PDIA4,RAB10,RAB6B,RAB8B,RPL10,RPL10A,RPL13,RPL13A,RPL14,RPL15,RPL18A,RPL22,RPL26,RPL29,RPL32,RPL34,RPL37A,RPL7,RPL7A,RPLP1,RPS12,RPS16,RPS19,RPS23,RPS25,RPS26,RPS29,RPS3A,RPS4X,RPS5,RPS6,RPS7,SEC31A,SLC25A5,SRP14,SRSF3
GO:0006725	cellular aromatic compound metabolic process	76	4754	6.12e-09	ENSP00000012443,ENSP00000168216,ENSP00000216038,ENSP00000216832,ENSP00000221801,ENSP00000222247,ENSP00000222381,ENSP00000225792,ENSP00000230050,ENSP00000246194,ENSP00000251453,ENSP00000254480,ENSP00000254657,ENSP00000263697,ENSP00000264010,ENSP00000265866,ENSP00000270776,ENSP00000273398,ENSP00000283179,ENSP00000286621,ENSP00000290299,ENSP00000292401,ENSP00000296674,ENSP00000300738,ENSP00000304229…	ADK,ALDOA,ATP5O,ATP6V1A,AZGP1,C9orf142,CDC5L,CHD4,CTCF,DBI,DDX17,DDX5,DNAJC8,EIF4A2,EIF6,EWSR1,FANCI,FBL,G3BP1,H2AFX,HINT1,HK1,HNRNPH3,HNRNPM,HNRNPU,HSD17B10,LDHB,LRRFIP1,MNDA,PCBP2,PER2,PGD,PNN,PON1,PPP5C,PRPS1,PURA,RALY,RBM3,RPL10,RPL10A,RPL13,RPL13A,RPL14,RPL15,RPL18A,RPL22,RPL26,RPL29,RPL32,RPL34,RPL37A,RPL7,RPL7A,RPLP1,RPS12,RPS16,RPS19,RPS23,RPS25,RPS26,RPS29,RPS3A,RPS4X,RPS5,RPS6,RPS7,RRM1…
GO:0010468	regulation of gene expression	73	4533	1.37e-08	ENSP00000216832,ENSP00000217131,ENSP00000222247,ENSP00000225792,ENSP00000230050,ENSP00000232003,ENSP00000246194,ENSP00000247153,ENSP00000251453,ENSP00000254480,ENSP00000254657,ENSP00000254722,ENSP00000264010,ENSP00000264690,ENSP00000283179,ENSP00000296674,ENSP00000304229,ENSP00000307889,ENSP00000308405,ENSP00000309334,ENSP00000318195,ENSP00000326381,ENSP00000331544,ENSP00000332449,ENSP00000332706…	AGT,AHNAK,CCL5,CDC5L,CFP,CHD4,CRIP1,CTCF,CTSZ,DDX17,DDX5,EIF4A2,EIF6,EWSR1,FBLN1,H2AFV,H2AFX,H2AFY,HINT1,HIST1H1C,HIST1H3A,HIST2H3A,HNRNPU,HRG,KLKB1,LRRFIP1,MATR3,MNDA,NCL,PER2,PNN,PRDX6,PURA,RALY,RBM3,RPL10,RPL10A,RPL13,RPL13A,RPL14,RPL15,RPL18A,RPL22,RPL26,RPL29,RPL32,RPL34,RPL37A,RPL7,RPL7A,RPLP1,RPS12,RPS16,RPS19,RPS23,RPS25,RPS26,RPS29,RPS3A,RPS4X,RPS5,RPS6,RPS7,S100A8,S100A9,SERPINF1,SMARCC…
GO:0016070	RNA metabolic process	61	3430	2.25e-08	ENSP00000012443,ENSP00000168216,ENSP00000216038,ENSP00000216832,ENSP00000221801,ENSP00000222247,ENSP00000225792,ENSP00000230050,ENSP00000246194,ENSP00000251453,ENSP00000254480,ENSP00000254657,ENSP00000263697,ENSP00000264010,ENSP00000265866,ENSP00000283179,ENSP00000292401,ENSP00000296674,ENSP00000304229,ENSP00000307889,ENSP00000309334,ENSP00000325376,ENSP00000326381,ENSP00000332706,ENSP00000339095…	AZGP1,CDC5L,CHD4,CTCF,DDX17,DDX5,DNAJC8,EIF4A2,EIF6,EWSR1,FBL,HINT1,HNRNPH3,HNRNPM,HNRNPU,HSD17B10,LRRFIP1,MNDA,PCBP2,PER2,PNN,PPP5C,PURA,RALY,RBM3,RPL10,RPL10A,RPL13,RPL13A,RPL14,RPL15,RPL18A,RPL22,RPL26,RPL29,RPL32,RPL34,RPL37A,RPL7,RPL7A,RPLP1,RPS12,RPS16,RPS19,RPS23,RPS25,RPS26,RPS29,RPS3A,RPS4X,RPS5,RPS6,RPS7,RTCB,SMARCC1,SND1,SNRPB,SRSF3,SYNCRIP,XRCC6,ZSCAN2
GO:0060255	regulation of macromolecule metabolic process	87	6072	2.68e-08	ENSP00000012443,ENSP00000176763,ENSP00000216802,ENSP00000216832,ENSP00000217131,ENSP00000222247,ENSP00000225792,ENSP00000230050,ENSP00000232003,ENSP00000246194,ENSP00000247153,ENSP00000251453,ENSP00000254480,ENSP00000254657,ENSP00000254722,ENSP00000264010,ENSP00000264690,ENSP00000275603,ENSP00000283179,ENSP00000291568,ENSP00000296674,ENSP00000304229,ENSP00000307889,ENSP00000308405,ENSP00000309334…	AGT,AHNAK,CCL5,CCT6A,CDC5L,CFP,CHD4,CRIP1,CSTB,CTCF,CTSZ,DDX17,DDX5,EIF3A,EIF4A2,EIF6,EWSR1,FANCI,FBLN1,GSTP1,H2AFV,H2AFX,H2AFY,HINT1,HIST1H1C,HIST1H3A,HIST2H3A,HNRNPU,HRG,ITIH3,KLKB1,LRRFIP1,MATR3,MNDA,NCL,NUB1,PER2,PNN,PPP5C,PRDX6,PSMB8,PSMD2,PSME2,PURA,RAC1,RALY,RBM3,RPL10,RPL10A,RPL13,RPL13A,RPL14,RPL15,RPL18A,RPL22,RPL26,RPL29,RPL32,RPL34,RPL37A,RPL7,RPL7A,RPLP1,RPS12,RPS16,RPS19,RPS23,RPS25…
GO:0010467	gene expression	64	3733	2.87e-08	ENSP00000012443,ENSP00000168216,ENSP00000216038,ENSP00000216832,ENSP00000217131,ENSP00000221801,ENSP00000222247,ENSP00000225792,ENSP00000230050,ENSP00000246194,ENSP00000251453,ENSP00000254480,ENSP00000254657,ENSP00000263697,ENSP00000264010,ENSP00000264690,ENSP00000265866,ENSP00000283179,ENSP00000296674,ENSP00000304229,ENSP00000307889,ENSP00000309334,ENSP00000325376,ENSP00000326381,ENSP00000332706…	CDC5L,CHD4,CTCF,CTSZ,DDX17,DDX5,DNAJC8,EEF1B2,EIF3A,EIF4A2,EIF6,EWSR1,FBL,HINT1,HNRNPH3,HNRNPM,HNRNPU,HSD17B10,KLKB1,LRRFIP1,MNDA,PCBP2,PER2,PNN,PPP5C,PURA,RALY,RBM3,RPL10,RPL10A,RPL13,RPL13A,RPL14,RPL15,RPL18A,RPL22,RPL26,RPL29,RPL32,RPL34,RPL37A,RPL7,RPL7A,RPLP1,RPS12,RPS16,RPS19,RPS23,RPS25,RPS26,RPS29,RPS3A,RPS4X,RPS5,RPS6,RPS7,RTCB,SMARCC1,SND1,SNRPB,SRSF3,SYNCRIP,XRCC6,ZSCAN2
GO:0090304	nucleic acid metabolic process	66	3941	3.44e-08	ENSP00000012443,ENSP00000168216,ENSP00000216038,ENSP00000216832,ENSP00000221801,ENSP00000222247,ENSP00000225792,ENSP00000230050,ENSP00000246194,ENSP00000251453,ENSP00000254480,ENSP00000254657,ENSP00000263697,ENSP00000264010,ENSP00000265866,ENSP00000283179,ENSP00000292401,ENSP00000296674,ENSP00000300738,ENSP00000304229,ENSP00000307889,ENSP00000309334,ENSP00000310842,ENSP00000325376,ENSP00000326381…	AZGP1,C9orf142,CDC5L,CHD4,CTCF,DDX17,DDX5,DNAJC8,EIF4A2,EIF6,EWSR1,FANCI,FBL,G3BP1,H2AFX,HINT1,HNRNPH3,HNRNPM,HNRNPU,HSD17B10,LRRFIP1,MNDA,PCBP2,PER2,PNN,PPP5C,PURA,RALY,RBM3,RPL10,RPL10A,RPL13,RPL13A,RPL14,RPL15,RPL18A,RPL22,RPL26,RPL29,RPL32,RPL34,RPL37A,RPL7,RPL7A,RPLP1,RPS12,RPS16,RPS19,RPS23,RPS25,RPS26,RPS29,RPS3A,RPS4X,RPS5,RPS6,RPS7,RRM1,RTCB,SMARCC1,SND1,SNRPB,SRSF3,SYNCRIP,XRCC6,ZSCAN2
GO:0006396	RNA processing	27	825	4.11e-08	ENSP00000168216,ENSP00000216038,ENSP00000216832,ENSP00000221801,ENSP00000225792,ENSP00000246194,ENSP00000251453,ENSP00000263697,ENSP00000265866,ENSP00000283179,ENSP00000325376,ENSP00000339095,ENSP00000339795,ENSP00000352438,ENSP00000358635,ENSP00000360532,ENSP00000361076,ENSP00000362820,ENSP00000363018,ENSP00000363574,ENSP00000365950,ENSP00000369757,ENSP00000379506,ENSP00000380033,ENSP00000412566…	CDC5L,DDX17,DDX5,DNAJC8,EIF6,FBL,HNRNPH3,HNRNPM,HNRNPU,HSD17B10,PCBP2,PNN,RALY,RBM3,RPL10A,RPL14,RPL26,RPL7,RPL7A,RPS16,RPS19,RPS6,RPS7,RTCB,SNRPB,SRSF3,SYNCRIP
GO:1901360	organic cyclic compound metabolic process	76	4963	4.44e-08	ENSP00000012443,ENSP00000168216,ENSP00000216038,ENSP00000216832,ENSP00000221801,ENSP00000222247,ENSP00000222381,ENSP00000225792,ENSP00000230050,ENSP00000246194,ENSP00000251453,ENSP00000254480,ENSP00000254657,ENSP00000263697,ENSP00000264010,ENSP00000265866,ENSP00000270776,ENSP00000273398,ENSP00000283179,ENSP00000286621,ENSP00000290299,ENSP00000292401,ENSP00000296674,ENSP00000300738,ENSP00000304229…	ADK,ALDOA,ATP5O,ATP6V1A,AZGP1,C9orf142,CDC5L,CHD4,CTCF,DBI,DDX17,DDX5,DNAJC8,EIF4A2,EIF6,EWSR1,FANCI,FBL,G3BP1,H2AFX,HINT1,HK1,HNRNPH3,HNRNPM,HNRNPU,HSD17B10,LDHB,LRRFIP1,MNDA,PCBP2,PER2,PGD,PNN,PON1,PPP5C,PRPS1,PURA,RALY,RBM3,RPL10,RPL10A,RPL13,RPL13A,RPL14,RPL15,RPL18A,RPL22,RPL26,RPL29,RPL32,RPL34,RPL37A,RPL7,RPL7A,RPLP1,RPS12,RPS16,RPS19,RPS23,RPS25,RPS26,RPS29,RPS3A,RPS4X,RPS5,RPS6,RPS7,RRM1…
GO:0042119	neutrophil activation	21	497	4.89e-08	ENSP00000176763,ENSP00000207549,ENSP00000217131,ENSP00000228740,ENSP00000236671,ENSP00000247153,ENSP00000262428,ENSP00000262455,ENSP00000264710,ENSP00000267884,ENSP00000291568,ENSP00000310129,ENSP00000342026,ENSP00000348461,ENSP00000352257,ENSP00000357123,ENSP00000357722,ENSP00000357727,ENSP00000378669,ENSP00000381607,ENSP00000474412	ALDOA,CCL5,CFP,COTL1,CSTB,CTSD,CTSZ,ERP44,GSTP1,LTA4H,MNDA,PRDX6,PSMD2,RAB10,RAC1,S100A8,S100A9,SRP14,STK10,UNC13D,XRCC6
GO:0019222	regulation of metabolic process	90	6516	6.43e-08	ENSP00000012443,ENSP00000176763,ENSP00000216802,ENSP00000216832,ENSP00000217131,ENSP00000222247,ENSP00000225792,ENSP00000230050,ENSP00000232003,ENSP00000246194,ENSP00000247153,ENSP00000251453,ENSP00000254480,ENSP00000254657,ENSP00000254722,ENSP00000264010,ENSP00000264380,ENSP00000264690,ENSP00000273398,ENSP00000275603,ENSP00000283179,ENSP00000291568,ENSP00000296674,ENSP00000304229,ENSP00000307889…	AGT,AHNAK,ATP6V1A,CCL5,CCT6A,CDC5L,CFP,CHD4,CRIP1,CSTB,CTCF,CTSZ,DDX17,DDX5,EIF3A,EIF4A2,EIF6,EWSR1,FANCI,FBLN1,GSTP1,H2AFV,H2AFX,H2AFY,HINT1,HIST1H1C,HIST1H3A,HIST2H3A,HNRNPU,HRG,ITGB1,ITIH3,KLKB1,LRRFIP1,MATR3,MNDA,NCL,NUB1,PER2,PIKFYVE,PNN,PPP5C,PRDX6,PSMB8,PSMD2,PSME2,PURA,RAC1,RALY,RBM3,RPL10,RPL10A,RPL13,RPL13A,RPL14,RPL15,RPL18A,RPL22,RPL26,RPL29,RPL32,RPL34,RPL37A,RPL7,RPL7A,RPLP1,RPS12,R…
GO:0022613	ribonucleoprotein complex biogenesis	19	409	6.98e-08	ENSP00000221801,ENSP00000251453,ENSP00000296674,ENSP00000339095,ENSP00000339795,ENSP00000358140,ENSP00000361076,ENSP00000363018,ENSP00000363574,ENSP00000369757,ENSP00000377681,ENSP00000378163,ENSP00000379506,ENSP00000380033,ENSP00000412566,ENSP00000413436,ENSP00000463784,ENSP00000470972,ENSP00000472985	DDX17,EIF3A,EIF6,FBL,G3BP1,RPL10,RPL10A,RPL14,RPL26,RPL34,RPL7,RPL7A,RPS16,RPS19,RPS23,RPS5,RPS6,RPS7,SNRPB
GO:0043170	macromolecule metabolic process	98	7453	7.1e-08	ENSP00000012443,ENSP00000168216,ENSP00000176763,ENSP00000216038,ENSP00000216802,ENSP00000216832,ENSP00000217131,ENSP00000221801,ENSP00000222247,ENSP00000225792,ENSP00000228740,ENSP00000230050,ENSP00000236671,ENSP00000246194,ENSP00000247153,ENSP00000251453,ENSP00000254480,ENSP00000254657,ENSP00000261211,ENSP00000261405,ENSP00000262455,ENSP00000263697,ENSP00000264010,ENSP00000264690,ENSP00000265866…	AGT,AZGP1,C9orf142,CCL5,CDC5L,CDK17,CFP,CHD4,CTCF,CTSD,CTSZ,DDX17,DDX5,DNAJC8,EEF1B2,EIF3A,EIF4A2,EIF6,ERP44,EWSR1,FANCI,FBL,FBLN1,G3BP1,H2AFX,HGFAC,HINT1,HIST1H1C,HIST1H3A,HIST2H3A,HNRNPH3,HNRNPM,HNRNPU,HSD17B10,ITGB1,ITIH3,KLKB1,LRRFIP1,LTA4H,LTBP1,MNDA,NUB1,PCBP2,PER2,PGLYRP2,PNN,PPP5C,PSMA1,PSMB8,PSMD2,PSME2,PURA,RAC1,RALY,RBM3,RPL10,RPL10A,RPL13,RPL13A,RPL14,RPL15,RPL18A,RPL22,RPL26,RPL29,RP…
GO:0044271	cellular nitrogen compound biosynthetic process	60	3528	1.68e-07	ENSP00000012443,ENSP00000216832,ENSP00000222247,ENSP00000225792,ENSP00000230050,ENSP00000246194,ENSP00000251453,ENSP00000254480,ENSP00000254657,ENSP00000264010,ENSP00000275428,ENSP00000283179,ENSP00000286621,ENSP00000290299,ENSP00000296674,ENSP00000300738,ENSP00000304229,ENSP00000307889,ENSP00000309334,ENSP00000326381,ENSP00000332706,ENSP00000339095,ENSP00000339795,ENSP00000346037,ENSP00000346050…	ADK,ALDOA,ATP5O,CDC5L,CHD4,CTCF,DDX17,DDX5,EEF1B2,EIF3A,EIF4A2,EIF6,EWSR1,GGCT,HAGH,HINT1,HK1,HNRNPU,LRRFIP1,MNDA,PER2,PNN,PPP5C,PRPS1,PURA,RALY,RPL10,RPL10A,RPL13,RPL13A,RPL14,RPL15,RPL18A,RPL22,RPL26,RPL29,RPL32,RPL34,RPL37A,RPL7,RPL7A,RPLP1,RPS12,RPS16,RPS19,RPS23,RPS25,RPS26,RPS29,RPS3A,RPS4X,RPS5,RPS6,RPS7,RRM1,SMARCC1,SND1,SNRPB,XRCC6,ZSCAN2
GO:0043312	neutrophil degranulation	20	485	1.72e-07	ENSP00000176763,ENSP00000207549,ENSP00000217131,ENSP00000228740,ENSP00000236671,ENSP00000247153,ENSP00000262428,ENSP00000262455,ENSP00000264710,ENSP00000267884,ENSP00000291568,ENSP00000310129,ENSP00000342026,ENSP00000348461,ENSP00000352257,ENSP00000357123,ENSP00000357722,ENSP00000357727,ENSP00000378669,ENSP00000381607	ALDOA,CFP,COTL1,CSTB,CTSD,CTSZ,ERP44,GSTP1,LTA4H,MNDA,PRDX6,PSMD2,RAB10,RAC1,S100A8,S100A9,SRP14,STK10,UNC13D,XRCC6
GO:0006887	exocytosis	25	774	2.1e-07	ENSP00000176763,ENSP00000207549,ENSP00000217131,ENSP00000228740,ENSP00000232003,ENSP00000236671,ENSP00000247153,ENSP00000261405,ENSP00000262428,ENSP00000262455,ENSP00000264710,ENSP00000267884,ENSP00000291568,ENSP00000310129,ENSP00000312734,ENSP00000342026,ENSP00000348461,ENSP00000352257,ENSP00000357123,ENSP00000357722,ENSP00000357727,ENSP00000378669,ENSP00000381607,ENSP00000415769,ENSP00000474412	ALDOA,CCL5,CFP,COTL1,CSTB,CTSD,CTSZ,ERP44,GSTP1,HRG,ITIH3,LTA4H,MNDA,PRDX6,PSMD2,RAB10,RAB8B,RAC1,S100A8,S100A9,SRP14,STK10,UNC13D,VWF,XRCC6
GO:0042254	ribosome biogenesis	15	270	3.75e-07	ENSP00000221801,ENSP00000251453,ENSP00000339095,ENSP00000339795,ENSP00000361076,ENSP00000363018,ENSP00000363574,ENSP00000369757,ENSP00000378163,ENSP00000379506,ENSP00000380033,ENSP00000413436,ENSP00000463784,ENSP00000470972,ENSP00000472985	DDX17,EIF6,FBL,RPL10,RPL10A,RPL14,RPL26,RPL34,RPL7,RPL7A,RPS16,RPS19,RPS5,RPS6,RPS7
GO:0045055	regulated exocytosis	23	691	4.93e-07	ENSP00000176763,ENSP00000207549,ENSP00000217131,ENSP00000228740,ENSP00000232003,ENSP00000236671,ENSP00000247153,ENSP00000261405,ENSP00000262428,ENSP00000262455,ENSP00000264710,ENSP00000267884,ENSP00000291568,ENSP00000310129,ENSP00000342026,ENSP00000348461,ENSP00000352257,ENSP00000357123,ENSP00000357722,ENSP00000357727,ENSP00000378669,ENSP00000381607,ENSP00000415769	ALDOA,CFP,COTL1,CSTB,CTSD,CTSZ,ERP44,GSTP1,HRG,ITIH3,LTA4H,MNDA,PRDX6,PSMD2,RAB10,RAC1,S100A8,S100A9,SRP14,STK10,UNC13D,VWF,XRCC6
GO:0032940	secretion by cell	27	959	7.31e-07	ENSP00000176763,ENSP00000207549,ENSP00000217131,ENSP00000228740,ENSP00000232003,ENSP00000236671,ENSP00000247153,ENSP00000261405,ENSP00000262428,ENSP00000262455,ENSP00000264710,ENSP00000267884,ENSP00000286091,ENSP00000291568,ENSP00000310129,ENSP00000312734,ENSP00000342026,ENSP00000348461,ENSP00000352257,ENSP00000355627,ENSP00000357123,ENSP00000357722,ENSP00000357727,ENSP00000378669,ENSP00000381607…	AGT,ALDOA,CCL5,CFP,COTL1,CSTB,CTSD,CTSZ,ERP44,GSTP1,HRG,ITIH3,LTA4H,MNDA,PDIA4,PRDX6,PSMD2,RAB10,RAB8B,RAC1,S100A8,S100A9,SRP14,STK10,UNC13D,VWF,XRCC6
GO:0019538	protein metabolic process	65	4194	9.39e-07	ENSP00000012443,ENSP00000176763,ENSP00000216802,ENSP00000217131,ENSP00000221801,ENSP00000222247,ENSP00000228740,ENSP00000230050,ENSP00000236671,ENSP00000247153,ENSP00000251453,ENSP00000254657,ENSP00000261211,ENSP00000261405,ENSP00000262455,ENSP00000264690,ENSP00000296674,ENSP00000299427,ENSP00000307889,ENSP00000309334,ENSP00000310129,ENSP00000326381,ENSP00000331544,ENSP00000339095,ENSP00000339566…	AGT,CCL5,CDK17,CFP,CHD4,CTSD,CTSZ,EEF1B2,EIF3A,EIF4A2,EIF6,ERP44,FBL,FBLN1,HGFAC,HIST1H1C,HIST1H3A,HIST2H3A,KLKB1,LTA4H,LTBP1,NUB1,PCBP2,PER2,PPP5C,PSMA1,PSMB8,PSMD2,PSME2,RAC1,RPL10,RPL10A,RPL13,RPL13A,RPL14,RPL15,RPL18A,RPL22,RPL26,RPL29,RPL32,RPL34,RPL37A,RPL7,RPL7A,RPLP1,RPS12,RPS16,RPS19,RPS23,RPS25,RPS26,RPS29,RPS3A,RPS4X,RPS5,RPS6,RPS7,S100A8,S100A9,SNRPB,STK10,TEK,TPP1,VWF
GO:0002366	leukocyte activation involved in immune response	21	616	1.45e-06	ENSP00000176763,ENSP00000207549,ENSP00000217131,ENSP00000228740,ENSP00000236671,ENSP00000247153,ENSP00000262428,ENSP00000262455,ENSP00000264710,ENSP00000267884,ENSP00000291568,ENSP00000310129,ENSP00000342026,ENSP00000348461,ENSP00000352257,ENSP00000357123,ENSP00000357722,ENSP00000357727,ENSP00000369757,ENSP00000378669,ENSP00000381607	ALDOA,CFP,COTL1,CSTB,CTSD,CTSZ,ERP44,GSTP1,LTA4H,MNDA,PRDX6,PSMD2,RAB10,RAC1,RPS6,S100A8,S100A9,SRP14,STK10,UNC13D,XRCC6
GO:0046903	secretion	28	1070	1.68e-06	ENSP00000176763,ENSP00000207549,ENSP00000217131,ENSP00000228740,ENSP00000232003,ENSP00000236671,ENSP00000247153,ENSP00000261405,ENSP00000262428,ENSP00000262455,ENSP00000264710,ENSP00000267884,ENSP00000285379,ENSP00000286091,ENSP00000291568,ENSP00000310129,ENSP00000312734,ENSP00000342026,ENSP00000348461,ENSP00000352257,ENSP00000355627,ENSP00000357123,ENSP00000357722,ENSP00000357727,ENSP00000378669…	AGT,ALDOA,CA2,CCL5,CFP,COTL1,CSTB,CTSD,CTSZ,ERP44,GSTP1,HRG,ITIH3,LTA4H,MNDA,PDIA4,PRDX6,PSMD2,RAB10,RAB8B,RAC1,S100A8,S100A9,SRP14,STK10,UNC13D,VWF,XRCC6
GO:0006364	rRNA processing	12	192	3.14e-06	ENSP00000221801,ENSP00000251453,ENSP00000339095,ENSP00000339795,ENSP00000361076,ENSP00000363018,ENSP00000363574,ENSP00000369757,ENSP00000379506,ENSP00000380033,ENSP00000463784,ENSP00000470972	DDX17,EIF6,FBL,RPL10A,RPL14,RPL26,RPL7,RPL7A,RPS16,RPS19,RPS6,RPS7
GO:0044085	cellular component biogenesis	46	2556	3.87e-06	ENSP00000012443,ENSP00000168216,ENSP00000217131,ENSP00000221801,ENSP00000251453,ENSP00000261405,ENSP00000263354,ENSP00000264010,ENSP00000264380,ENSP00000296674,ENSP00000300738,ENSP00000306362,ENSP00000308753,ENSP00000339095,ENSP00000339566,ENSP00000339795,ENSP00000348461,ENSP00000350018,ENSP00000352257,ENSP00000358140,ENSP00000361076,ENSP00000363018,ENSP00000363574,ENSP00000364893,ENSP00000367263…	AHNAK,ALDOA,ARHGEF7,CCL5,CTCF,CTSZ,DDX17,EIF3A,EIF6,ENSG00000103426,FBL,G3BP1,H2AFX,H2AFY,HIST1H1C,HIST1H3A,HIST2H3A,HSD17B10,ITGB1,NAPA,PIKFYVE,PPP5C,RAC1,RPL10,RPL10A,RPL14,RPL26,RPL34,RPL7,RPL7A,RPS16,RPS19,RPS23,RPS5,RPS6,RPS7,RRM1,SEC31A,SH3BP1,SNRPB,SOD2,TBCA,TEK,TMOD3,VWF,XRCC6
GO:0044267	cellular protein metabolic process	57	3603	5.37e-06	ENSP00000012443,ENSP00000176763,ENSP00000216802,ENSP00000217131,ENSP00000221801,ENSP00000222247,ENSP00000228740,ENSP00000230050,ENSP00000251453,ENSP00000254657,ENSP00000261211,ENSP00000296674,ENSP00000307889,ENSP00000309334,ENSP00000310129,ENSP00000326381,ENSP00000339095,ENSP00000339566,ENSP00000339795,ENSP00000346037,ENSP00000346050,ENSP00000346088,ENSP00000348461,ENSP00000348849,ENSP00000349508…	AGT,CCL5,CDK17,CHD4,CTSZ,EEF1B2,EIF3A,EIF4A2,EIF6,FBL,HIST1H1C,HIST1H3A,HIST2H3A,LTA4H,LTBP1,NUB1,PCBP2,PER2,PPP5C,PSMA1,PSMB8,PSMD2,PSME2,RAC1,RPL10,RPL10A,RPL13,RPL13A,RPL14,RPL15,RPL18A,RPL22,RPL26,RPL29,RPL32,RPL34,RPL37A,RPL7,RPL7A,RPLP1,RPS12,RPS16,RPS19,RPS23,RPS25,RPS26,RPS29,RPS3A,RPS4X,RPS5,RPS6,RPS7,S100A8,S100A9,SNRPB,STK10,TEK
GO:0016192	vesicle-mediated transport	35	1699	8.89e-06	ENSP00000176763,ENSP00000207549,ENSP00000217131,ENSP00000221957,ENSP00000228740,ENSP00000228825,ENSP00000232003,ENSP00000236671,ENSP00000247153,ENSP00000261405,ENSP00000262428,ENSP00000262455,ENSP00000263354,ENSP00000264380,ENSP00000264710,ENSP00000267884,ENSP00000285208,ENSP00000291568,ENSP00000310129,ENSP00000312734,ENSP00000342026,ENSP00000348461,ENSP00000350018,ENSP00000352257,ENSP00000357123…	ALDOA,ARPC3,CCL5,CFP,COTL1,CSTB,CTSD,CTSZ,ENSG00000103426,ERP44,GSTP1,HPR,HRG,ITGB1,ITIH3,LTA4H,MNDA,NAPA,PIKFYVE,PLIN3,PRDX6,PSMD2,RAB10,RAB6B,RAB8B,RAC1,S100A8,S100A9,SEC31A,SH3BP1,SRP14,STK10,UNC13D,VWF,XRCC6
GO:0001775	cell activation	26	1024	9.01e-06	ENSP00000176763,ENSP00000207549,ENSP00000217131,ENSP00000228740,ENSP00000232003,ENSP00000236671,ENSP00000247153,ENSP00000261405,ENSP00000262428,ENSP00000262455,ENSP00000264710,ENSP00000267884,ENSP00000291568,ENSP00000310129,ENSP00000342026,ENSP00000346088,ENSP00000348461,ENSP00000352257,ENSP00000357123,ENSP00000357722,ENSP00000357727,ENSP00000369757,ENSP00000378669,ENSP00000379350,ENSP00000381607…	ALDOA,CCL5,CFP,COTL1,CSTB,CTSD,CTSZ,ERP44,GSTP1,HRG,ITGB1,LTA4H,MNDA,PRDX6,PSMD2,RAB10,RAC1,RPL22,RPS6,S100A8,S100A9,SRP14,STK10,UNC13D,VWF,XRCC6
GO:0002376	immune system process	43	2370	9.01e-06	ENSP00000176763,ENSP00000207549,ENSP00000217131,ENSP00000228740,ENSP00000228825,ENSP00000232003,ENSP00000236671,ENSP00000245185,ENSP00000247153,ENSP00000262428,ENSP00000262455,ENSP00000264710,ENSP00000267884,ENSP00000291568,ENSP00000308753,ENSP00000310129,ENSP00000312734,ENSP00000332449,ENSP00000342026,ENSP00000345968,ENSP00000346088,ENSP00000348461,ENSP00000352257,ENSP00000352438,ENSP00000354346…	ALDOA,ARHGEF7,ARPC3,CCL5,CFP,COTL1,CRIP1,CSTB,CTSD,CTSZ,DDX17,ERP44,GSTP1,HRG,ITGB1,LTA4H,MATR3,MNDA,MT2A,NUB1,PCBP2,PGLYRP2,PRDX6,PSMA1,PSMB8,PSMD2,RAB10,RAB8B,RAC1,RPL13A,RPL22,RPS19,RPS6,S100A8,S100A9,SEC31A,SRP14,STK10,SYNCRIP,TEK,TMOD3,UNC13D,XRCC6
GO:0045321	leukocyte activation	24	894	1e-05	ENSP00000176763,ENSP00000207549,ENSP00000217131,ENSP00000228740,ENSP00000236671,ENSP00000247153,ENSP00000262428,ENSP00000262455,ENSP00000264710,ENSP00000267884,ENSP00000291568,ENSP00000310129,ENSP00000342026,ENSP00000346088,ENSP00000348461,ENSP00000352257,ENSP00000357123,ENSP00000357722,ENSP00000357727,ENSP00000369757,ENSP00000378669,ENSP00000379350,ENSP00000381607,ENSP00000474412	ALDOA,CCL5,CFP,COTL1,CSTB,CTSD,CTSZ,ERP44,GSTP1,ITGB1,LTA4H,MNDA,PRDX6,PSMD2,RAB10,RAC1,RPL22,RPS6,S100A8,S100A9,SRP14,STK10,UNC13D,XRCC6
GO:0006955	immune response	33	1560	1.1e-05	ENSP00000176763,ENSP00000207549,ENSP00000217131,ENSP00000228740,ENSP00000232003,ENSP00000236671,ENSP00000245185,ENSP00000247153,ENSP00000262428,ENSP00000262455,ENSP00000264710,ENSP00000267884,ENSP00000291568,ENSP00000310129,ENSP00000332449,ENSP00000342026,ENSP00000345968,ENSP00000348461,ENSP00000352257,ENSP00000352438,ENSP00000354346,ENSP00000357123,ENSP00000357722,ENSP00000357727,ENSP00000358635…	ALDOA,CCL5,CFP,COTL1,CRIP1,CSTB,CTSD,CTSZ,ERP44,GSTP1,HRG,LTA4H,MATR3,MNDA,MT2A,NUB1,PCBP2,PGLYRP2,PRDX6,PSMB8,PSMD2,RAB10,RAC1,RPL13A,RPS19,RPS6,S100A8,S100A9,SRP14,STK10,SYNCRIP,UNC13D,XRCC6
GO:0002252	immune effector process	24	927	1.84e-05	ENSP00000176763,ENSP00000207549,ENSP00000217131,ENSP00000228740,ENSP00000228825,ENSP00000236671,ENSP00000247153,ENSP00000262428,ENSP00000262455,ENSP00000264710,ENSP00000267884,ENSP00000291568,ENSP00000310129,ENSP00000342026,ENSP00000348461,ENSP00000352257,ENSP00000352438,ENSP00000357123,ENSP00000357722,ENSP00000357727,ENSP00000369757,ENSP00000378669,ENSP00000380033,ENSP00000381607	ALDOA,ARPC3,CFP,COTL1,CSTB,CTSD,CTSZ,DDX17,ERP44,GSTP1,LTA4H,MNDA,PCBP2,PRDX6,PSMD2,RAB10,RAC1,RPS6,S100A8,S100A9,SRP14,STK10,UNC13D,XRCC6
GO:0050789	regulation of biological process	120	11116	2.29e-05	ENSP00000012443,ENSP00000176763,ENSP00000207549,ENSP00000216802,ENSP00000216832,ENSP00000217131,ENSP00000222247,ENSP00000222381,ENSP00000225792,ENSP00000228825,ENSP00000230050,ENSP00000232003,ENSP00000245185,ENSP00000246069,ENSP00000246194,ENSP00000247153,ENSP00000251453,ENSP00000254480,ENSP00000254657,ENSP00000254722,ENSP00000260402,ENSP00000262455,ENSP00000263354,ENSP00000264010,ENSP00000264380…	AGT,AHNAK,ALDOA,ARHGEF7,ARPC3,ATP6V1A,AZGP1,CA2,CCL5,CCT6A,CDC5L,CFP,CHD4,CRIP1,CSTB,CTCF,CTSZ,DDX17,DDX5,DSTN,EIF3A,EIF4A2,EIF6,ERP44,EWSR1,FANCI,FBLN1,G3BP1,GGCT,GSTP1,H2AFV,H2AFX,H2AFY,HINT1,HIST1H1C,HIST1H3A,HIST2H3A,HNRNPM,HNRNPU,HRG,ITGB1,ITIH3,KLKB1,LRRFIP1,LSP1,LTBP1,MATR3,MNDA,MT2A,NAPA,NCL,NUB1,PCBP2,PDIA4,PER2,PGLYRP2,PIKFYVE,PLCB2,PNN,PON1,PPP5C,PRDX2,PRDX6,PSMB8,PSMD2,PSME2,PURA,RAB1…
GO:0000398	mRNA splicing, via spliceosome	13	284	2.43e-05	ENSP00000216832,ENSP00000225792,ENSP00000246194,ENSP00000263697,ENSP00000265866,ENSP00000283179,ENSP00000325376,ENSP00000352438,ENSP00000358635,ENSP00000360532,ENSP00000362820,ENSP00000380033,ENSP00000412566	CDC5L,DDX17,DDX5,DNAJC8,HNRNPH3,HNRNPM,HNRNPU,PCBP2,PNN,RALY,SNRPB,SRSF3,SYNCRIP
GO:0034470	ncRNA processing	14	340	2.97e-05	ENSP00000168216,ENSP00000216038,ENSP00000221801,ENSP00000251453,ENSP00000339095,ENSP00000339795,ENSP00000361076,ENSP00000363018,ENSP00000363574,ENSP00000369757,ENSP00000379506,ENSP00000380033,ENSP00000463784,ENSP00000470972	DDX17,EIF6,FBL,HSD17B10,RPL10A,RPL14,RPL26,RPL7,RPL7A,RPS16,RPS19,RPS6,RPS7,RTCB
GO:0042273	ribosomal large subunit biogenesis	7	68	6.39e-05	ENSP00000339795,ENSP00000361076,ENSP00000363018,ENSP00000363574,ENSP00000379506,ENSP00000413436,ENSP00000463784	EIF6,RPL10,RPL10A,RPL14,RPL26,RPL7,RPL7A
GO:0034645	cellular macromolecule biosynthetic process	53	3518	7.25e-05	ENSP00000012443,ENSP00000216832,ENSP00000222247,ENSP00000225792,ENSP00000230050,ENSP00000246194,ENSP00000251453,ENSP00000254480,ENSP00000254657,ENSP00000264010,ENSP00000283179,ENSP00000296674,ENSP00000300738,ENSP00000304229,ENSP00000307889,ENSP00000309334,ENSP00000326381,ENSP00000332706,ENSP00000339095,ENSP00000339795,ENSP00000346037,ENSP00000346050,ENSP00000346088,ENSP00000346762,ENSP00000348849…	CDC5L,CHD4,CTCF,DDX17,DDX5,EEF1B2,EIF3A,EIF4A2,EIF6,EWSR1,HINT1,HNRNPU,LRRFIP1,MNDA,PER2,PNN,PPP5C,PURA,RALY,RPL10,RPL10A,RPL13,RPL13A,RPL14,RPL15,RPL18A,RPL22,RPL26,RPL29,RPL32,RPL34,RPL37A,RPL7,RPL7A,RPLP1,RPS12,RPS16,RPS19,RPS23,RPS25,RPS26,RPS29,RPS3A,RPS4X,RPS5,RPS6,RPS7,RRM1,SMARCC1,SND1,SNRPB,XRCC6,ZSCAN2
GO:0065007	biological regulation	123	11740	7.78e-05	ENSP00000012443,ENSP00000176763,ENSP00000207549,ENSP00000216802,ENSP00000216832,ENSP00000217131,ENSP00000222247,ENSP00000222381,ENSP00000225792,ENSP00000226355,ENSP00000228825,ENSP00000230050,ENSP00000232003,ENSP00000245185,ENSP00000246069,ENSP00000246194,ENSP00000247153,ENSP00000251453,ENSP00000254480,ENSP00000254657,ENSP00000254722,ENSP00000260402,ENSP00000261405,ENSP00000262455,ENSP00000263354…	AFM,AGT,AHNAK,ALDOA,ARHGEF7,ARPC3,ATP6V1A,AZGP1,CA2,CCL5,CCT6A,CDC5L,CFP,CHD4,CRIP1,CSTB,CTCF,CTSZ,DDX17,DDX5,DSTN,EIF3A,EIF4A2,EIF6,ERP44,EWSR1,FANCI,FBLN1,G3BP1,GGCT,GSTP1,H2AFV,H2AFX,H2AFY,HINT1,HIST1H1C,HIST1H3A,HIST2H3A,HK1,HNRNPM,HNRNPU,HRG,ITGB1,ITIH3,KLKB1,LRRFIP1,LSP1,LTBP1,MATR3,MNDA,MT2A,NAPA,NCL,NUB1,PCBP2,PDIA4,PER2,PGLYRP2,PIKFYVE,PLCB2,PNN,PON1,PPP5C,PRDX2,PRDX6,PSMB8,PSMD2,PSME2,P…
GO:1901576	organic substance biosynthetic process	64	4656	8.84e-05	ENSP00000012443,ENSP00000216832,ENSP00000222247,ENSP00000225792,ENSP00000228740,ENSP00000230050,ENSP00000246194,ENSP00000251453,ENSP00000254480,ENSP00000254657,ENSP00000264010,ENSP00000264380,ENSP00000270776,ENSP00000275428,ENSP00000283179,ENSP00000286621,ENSP00000290299,ENSP00000296674,ENSP00000300738,ENSP00000304229,ENSP00000307889,ENSP00000309334,ENSP00000326381,ENSP00000332706,ENSP00000339095…	ADK,ALDOA,ATP5O,CDC5L,CHD4,CTCF,DDX17,DDX5,EEF1B2,EIF3A,EIF4A2,EIF6,EWSR1,GGCT,GSTP1,HAGH,HINT1,HK1,HNRNPU,LRRFIP1,LTA4H,MNDA,PER2,PGD,PIKFYVE,PNN,PPP5C,PRPS1,PURA,RALY,RPL10,RPL10A,RPL13,RPL13A,RPL14,RPL15,RPL18A,RPL22,RPL26,RPL29,RPL32,RPL34,RPL37A,RPL7,RPL7A,RPLP1,RPS12,RPS16,RPS19,RPS23,RPS25,RPS26,RPS29,RPS3A,RPS4X,RPS5,RPS6,RPS7,RRM1,SMARCC1,SND1,SNRPB,XRCC6,ZSCAN2
GO:0044249	cellular biosynthetic process	63	4567	9.82e-05	ENSP00000012443,ENSP00000216832,ENSP00000222247,ENSP00000225792,ENSP00000228740,ENSP00000230050,ENSP00000246194,ENSP00000251453,ENSP00000254480,ENSP00000254657,ENSP00000264010,ENSP00000264380,ENSP00000275428,ENSP00000283179,ENSP00000286621,ENSP00000290299,ENSP00000296674,ENSP00000300738,ENSP00000304229,ENSP00000307889,ENSP00000309334,ENSP00000326381,ENSP00000332706,ENSP00000339095,ENSP00000339795…	ADK,ALDOA,ATP5O,CDC5L,CHD4,CTCF,DDX17,DDX5,EEF1B2,EIF3A,EIF4A2,EIF6,EWSR1,GGCT,GSTP1,HAGH,HINT1,HK1,HNRNPU,LRRFIP1,LTA4H,MNDA,PER2,PIKFYVE,PNN,PPP5C,PRPS1,PURA,RALY,RPL10,RPL10A,RPL13,RPL13A,RPL14,RPL15,RPL18A,RPL22,RPL26,RPL29,RPL32,RPL34,RPL37A,RPL7,RPL7A,RPLP1,RPS12,RPS16,RPS19,RPS23,RPS25,RPS26,RPS29,RPS3A,RPS4X,RPS5,RPS6,RPS7,RRM1,SMARCC1,SND1,SNRPB,XRCC6,ZSCAN2
GO:0006417	regulation of translation	13	327	9.92e-05	ENSP00000254657,ENSP00000318195,ENSP00000326381,ENSP00000332706,ENSP00000357727,ENSP00000358635,ENSP00000362744,ENSP00000363574,ENSP00000365950,ENSP00000375730,ENSP00000413436,ENSP00000463784,ENSP00000474412	CCL5,EIF4A2,EIF6,NCL,PER2,PURA,RBM3,RPL10,RPL13A,RPL26,RPS4X,S100A9,SYNCRIP
GO:0044260	cellular macromolecule metabolic process	80	6413	9.92e-05	ENSP00000012443,ENSP00000168216,ENSP00000176763,ENSP00000216802,ENSP00000216832,ENSP00000217131,ENSP00000221801,ENSP00000222247,ENSP00000225792,ENSP00000228740,ENSP00000230050,ENSP00000246194,ENSP00000251453,ENSP00000254480,ENSP00000254657,ENSP00000261211,ENSP00000262455,ENSP00000264010,ENSP00000283179,ENSP00000296674,ENSP00000300738,ENSP00000304229,ENSP00000307889,ENSP00000309334,ENSP00000310129…	AGT,C9orf142,CCL5,CDC5L,CDK17,CHD4,CTCF,CTSZ,DDX17,DDX5,EEF1B2,EIF3A,EIF4A2,EIF6,ERP44,EWSR1,FANCI,FBL,H2AFX,HINT1,HIST1H1C,HIST1H3A,HIST2H3A,HNRNPU,HSD17B10,ITGB1,LRRFIP1,LTA4H,LTBP1,MNDA,NUB1,PCBP2,PER2,PNN,PPP5C,PSMA1,PSMB8,PSMD2,PSME2,PURA,RAC1,RALY,RPL10,RPL10A,RPL13,RPL13A,RPL14,RPL15,RPL18A,RPL22,RPL26,RPL29,RPL32,RPL34,RPL37A,RPL7,RPL7A,RPLP1,RPS12,RPS16,RPS19,RPS23,RPS25,RPS26,RPS29,RPS3…
GO:0010608	posttranscriptional regulation of gene expression	15	441	0.00011	ENSP00000254657,ENSP00000283179,ENSP00000318195,ENSP00000326381,ENSP00000332706,ENSP00000354346,ENSP00000357727,ENSP00000358635,ENSP00000362744,ENSP00000363574,ENSP00000365950,ENSP00000375730,ENSP00000413436,ENSP00000463784,ENSP00000474412	CCL5,EIF4A2,EIF6,HNRNPU,MATR3,NCL,PER2,PURA,RBM3,RPL10,RPL13A,RPL26,RPS4X,S100A9,SYNCRIP
GO:0008380	RNA splicing	14	391	0.00013	ENSP00000216038,ENSP00000216832,ENSP00000225792,ENSP00000246194,ENSP00000263697,ENSP00000265866,ENSP00000283179,ENSP00000325376,ENSP00000352438,ENSP00000358635,ENSP00000360532,ENSP00000362820,ENSP00000380033,ENSP00000412566	CDC5L,DDX17,DDX5,DNAJC8,HNRNPH3,HNRNPM,HNRNPU,PCBP2,PNN,RALY,RTCB,SNRPB,SRSF3,SYNCRIP
GO:0043933	protein-containing complex subunit organization	33	1770	0.00014	ENSP00000012443,ENSP00000168216,ENSP00000217131,ENSP00000246069,ENSP00000254480,ENSP00000261405,ENSP00000263354,ENSP00000264010,ENSP00000296674,ENSP00000300738,ENSP00000306362,ENSP00000339566,ENSP00000348461,ENSP00000352257,ENSP00000355627,ENSP00000358140,ENSP00000363574,ENSP00000367263,ENSP00000369375,ENSP00000377681,ENSP00000378669,ENSP00000378721,ENSP00000385479,ENSP00000412566,ENSP00000413436…	AGT,AHNAK,ALDOA,CCL5,CTCF,CTSZ,DSTN,EIF3A,EIF6,ENSG00000103426,G3BP1,H2AFX,H2AFY,HIST1H1C,HIST1H3A,HIST2H3A,HSD17B10,NAPA,PPP5C,RAC1,RPL10,RPS19,RPS23,RPS5,RRM1,SEC31A,SMARCC1,SNRPB,SOD2,TBCA,TEK,VWF,XRCC6
GO:0065003	protein-containing complex assembly	29	1514	0.00035	ENSP00000012443,ENSP00000168216,ENSP00000217131,ENSP00000261405,ENSP00000263354,ENSP00000296674,ENSP00000300738,ENSP00000306362,ENSP00000339566,ENSP00000348461,ENSP00000352257,ENSP00000358140,ENSP00000363574,ENSP00000367263,ENSP00000369375,ENSP00000377681,ENSP00000378669,ENSP00000378721,ENSP00000385479,ENSP00000412566,ENSP00000413436,ENSP00000423563,ENSP00000434024,ENSP00000446252,ENSP00000460885…	AHNAK,ALDOA,CCL5,CTSZ,EIF3A,EIF6,ENSG00000103426,G3BP1,H2AFX,H2AFY,HIST1H1C,HIST1H3A,HIST2H3A,HSD17B10,NAPA,PPP5C,RAC1,RPL10,RPS19,RPS23,RPS5,RRM1,SEC31A,SNRPB,SOD2,TBCA,TEK,VWF,XRCC6
GO:0071840	cellular component organization or biogenesis	67	5342	0.00099	ENSP00000012443,ENSP00000168216,ENSP00000217131,ENSP00000221418,ENSP00000221801,ENSP00000228825,ENSP00000246069,ENSP00000251453,ENSP00000254480,ENSP00000254657,ENSP00000261405,ENSP00000263354,ENSP00000264010,ENSP00000264380,ENSP00000264690,ENSP00000264710,ENSP00000275428,ENSP00000283179,ENSP00000290299,ENSP00000296674,ENSP00000299427,ENSP00000300738,ENSP00000305675,ENSP00000306362,ENSP00000308405…	AGT,AHNAK,ALDOA,ARHGEF7,ARPC3,ATP5O,CCL5,CHD4,CTCF,CTSZ,DDX17,DSTN,ECH1,EIF3A,EIF6,ENSG00000103426,FBL,FBLN1,G3BP1,GGCT,H2AFV,H2AFX,H2AFY,HIST1H1C,HIST1H3A,HIST2H3A,HNRNPU,HSD17B10,ITGB1,KLKB1,NAPA,PER2,PIKFYVE,PPP5C,PURA,RAB10,RAB8B,RAC1,RPL10,RPL10A,RPL14,RPL26,RPL34,RPL7,RPL7A,RPS16,RPS19,RPS23,RPS5,RPS6,RPS7,RRM1,S100A6,S100A9,SDPR,SEC31A,SH3BP1,SLC25A5,SMARCC1,SNRPB,SOD2,TBCA,TEK,TMOD3,TPP1,…
GO:0006950	response to stress	47	3267	0.001	ENSP00000012443,ENSP00000176763,ENSP00000207549,ENSP00000232003,ENSP00000245185,ENSP00000247153,ENSP00000254657,ENSP00000261405,ENSP00000262428,ENSP00000262455,ENSP00000264690,ENSP00000285379,ENSP00000286091,ENSP00000299427,ENSP00000301522,ENSP00000310842,ENSP00000331544,ENSP00000332449,ENSP00000342026,ENSP00000345968,ENSP00000348461,ENSP00000352257,ENSP00000352438,ENSP00000354346,ENSP00000355627…	AGT,C9orf142,CA2,CCL5,CDC5L,CFP,COTL1,CRIP1,DDX17,ERP44,FANCI,FBLN1,GSTP1,H2AFX,HIST1H3A,HIST2H3A,HRG,ITGB1,KLKB1,LSP1,MATR3,MNDA,MT2A,NUB1,PCBP2,PDIA4,PER2,PGLYRP2,PPP5C,PRDX2,PRDX6,PSMB8,RAC1,RPL13A,RPL26,RPS19,S100A8,S100A9,SEC31A,SOD2,STK10,SYNCRIP,TEK,TPP1,UNC13D,VWF,XRCC6
GO:0043484	regulation of RNA splicing	7	116	0.0014	ENSP00000225792,ENSP00000283179,ENSP00000342026,ENSP00000348849,ENSP00000362820,ENSP00000367263,ENSP00000380033	AHNAK,DDX17,DDX5,HNRNPU,PRDX6,RPS26,SRSF3
GO:0051262	protein tetramerization	8	157	0.0014	ENSP00000168216,ENSP00000300738,ENSP00000352257,ENSP00000378669,ENSP00000446252,ENSP00000470972,ENSP00000474412,ENSP00000480826	ALDOA,CCL5,HIST1H3A,HSD17B10,RPS19,RRM1,SOD2,XRCC6
GO:0071103	DNA conformation change	10	257	0.0014	ENSP00000264010,ENSP00000332706,ENSP00000339566,ENSP00000349508,ENSP00000352257,ENSP00000377681,ENSP00000385479,ENSP00000423563,ENSP00000434024,ENSP00000480826	CHD4,CTCF,G3BP1,H2AFX,H2AFY,HIST1H1C,HIST1H3A,HIST2H3A,PURA,XRCC6
GO:0000470	maturation of LSU-rRNA	4	24	0.0016	ENSP00000339795,ENSP00000361076,ENSP00000363018,ENSP00000363574	EIF6,RPL10A,RPL7,RPL7A
GO:0007159	leukocyte cell-cell adhesion	5	49	0.0016	ENSP00000176763,ENSP00000357722,ENSP00000357727,ENSP00000379350,ENSP00000474412	CCL5,ITGB1,S100A8,S100A9,STK10
GO:0044419	interspecies interaction between organisms	17	724	0.0023	ENSP00000232003,ENSP00000326381,ENSP00000331544,ENSP00000345968,ENSP00000346762,ENSP00000348461,ENSP00000352257,ENSP00000352438,ENSP00000357727,ENSP00000358140,ENSP00000358635,ENSP00000360671,ENSP00000364016,ENSP00000379350,ENSP00000434024,ENSP00000470972,ENSP00000474412	CCL5,EIF3A,EIF4A2,FBLN1,H2AFX,HRG,ITGB1,PCBP2,PGLYRP2,PSMB8,RAC1,RPS19,S100A9,SLC25A5,SND1,SYNCRIP,XRCC6
GO:0050727	regulation of inflammatory response	11	338	0.0028	ENSP00000247153,ENSP00000254722,ENSP00000264690,ENSP00000345968,ENSP00000355627,ENSP00000357722,ENSP00000357727,ENSP00000369375,ENSP00000381607,ENSP00000470972,ENSP00000474412	AGT,CCL5,CFP,GSTP1,KLKB1,PGLYRP2,RPS19,S100A8,S100A9,SERPINF1,TEK
GO:0070486	leukocyte aggregation	3	10	0.003	ENSP00000176763,ENSP00000357722,ENSP00000357727	S100A8,S100A9,STK10
GO:0016458	gene silencing	8	180	0.0031	ENSP00000308405,ENSP00000346762,ENSP00000363574,ENSP00000380033,ENSP00000385479,ENSP00000423563,ENSP00000434024,ENSP00000480826	DDX17,EIF6,H2AFV,H2AFX,H2AFY,HIST1H3A,HIST2H3A,SND1
GO:0006089	lactate metabolic process	3	11	0.0037	ENSP00000254657,ENSP00000379386,ENSP00000380514	HAGH,LDHB,PER2
GO:0051246	regulation of protein metabolic process	39	2668	0.0037	ENSP00000012443,ENSP00000176763,ENSP00000216802,ENSP00000217131,ENSP00000232003,ENSP00000247153,ENSP00000254480,ENSP00000254657,ENSP00000254722,ENSP00000264690,ENSP00000291568,ENSP00000310129,ENSP00000310842,ENSP00000318195,ENSP00000326381,ENSP00000331544,ENSP00000332706,ENSP00000339095,ENSP00000346037,ENSP00000348461,ENSP00000352257,ENSP00000355627,ENSP00000357722,ENSP00000357727,ENSP00000358140…	AGT,CCL5,CFP,CSTB,CTSZ,EIF3A,EIF4A2,EIF6,FANCI,FBLN1,GSTP1,H2AFY,HRG,ITIH3,KLKB1,NCL,NUB1,PER2,PPP5C,PSMB8,PSMD2,PSME2,PURA,RAC1,RBM3,RPL10,RPL13A,RPL26,RPLP1,RPS4X,RPS7,S100A8,S100A9,SERPINF1,SMARCC1,STK10,SYNCRIP,TEK,XRCC6
GO:1901890	positive regulation of cell junction assembly	4	31	0.0037	ENSP00000232003,ENSP00000348461,ENSP00000355627,ENSP00000369375	AGT,HRG,RAC1,TEK
GO:0006952	defense response	23	1234	0.0039	ENSP00000207549,ENSP00000232003,ENSP00000245185,ENSP00000247153,ENSP00000262428,ENSP00000264690,ENSP00000345968,ENSP00000348461,ENSP00000352257,ENSP00000352438,ENSP00000354346,ENSP00000357123,ENSP00000357722,ENSP00000357727,ENSP00000358635,ENSP00000364016,ENSP00000371194,ENSP00000375730,ENSP00000379350,ENSP00000380033,ENSP00000454264,ENSP00000470972,ENSP00000474412	CCL5,CFP,COTL1,DDX17,HRG,ITGB1,KLKB1,LSP1,MATR3,MNDA,MT2A,NUB1,PCBP2,PGLYRP2,PSMB8,RAC1,RPL13A,RPS19,S100A8,S100A9,SYNCRIP,UNC13D,XRCC6
GO:0022607	cellular component assembly	35	2343	0.0057	ENSP00000012443,ENSP00000168216,ENSP00000217131,ENSP00000261405,ENSP00000263354,ENSP00000264010,ENSP00000264380,ENSP00000296674,ENSP00000300738,ENSP00000306362,ENSP00000308753,ENSP00000339566,ENSP00000348461,ENSP00000350018,ENSP00000352257,ENSP00000358140,ENSP00000363574,ENSP00000364893,ENSP00000367263,ENSP00000369375,ENSP00000377681,ENSP00000378669,ENSP00000378721,ENSP00000379350,ENSP00000385479…	AHNAK,ALDOA,ARHGEF7,CCL5,CTCF,CTSZ,EIF3A,EIF6,ENSG00000103426,G3BP1,H2AFX,H2AFY,HIST1H1C,HIST1H3A,HIST2H3A,HSD17B10,ITGB1,NAPA,PIKFYVE,PPP5C,RAC1,RPL10,RPS19,RPS23,RPS5,RRM1,SEC31A,SH3BP1,SNRPB,SOD2,TBCA,TEK,TMOD3,VWF,XRCC6
GO:0006996	organelle organization	43	3131	0.006	ENSP00000012443,ENSP00000168216,ENSP00000217131,ENSP00000221418,ENSP00000221801,ENSP00000228825,ENSP00000246069,ENSP00000254480,ENSP00000254657,ENSP00000263354,ENSP00000264010,ENSP00000264710,ENSP00000275428,ENSP00000283179,ENSP00000290299,ENSP00000296674,ENSP00000299427,ENSP00000308405,ENSP00000308753,ENSP00000312734,ENSP00000332706,ENSP00000339566,ENSP00000348461,ENSP00000349508,ENSP00000350018…	ALDOA,ARHGEF7,ARPC3,ATP5O,CHD4,CTCF,CTSZ,DSTN,ECH1,EIF6,ENSG00000103426,FBL,G3BP1,GGCT,H2AFV,H2AFX,H2AFY,HIST1H1C,HIST1H3A,HIST2H3A,HNRNPU,HSD17B10,ITGB1,NAPA,PER2,PPP5C,PURA,RAB10,RAB8B,RAC1,RPL10,RPS19,RPS23,RPS5,S100A9,SEC31A,SH3BP1,SLC25A5,SMARCC1,SOD2,TMOD3,TPP1,XRCC6
GO:0042274	ribosomal small subunit biogenesis	5	68	0.0063	ENSP00000251453,ENSP00000339095,ENSP00000369757,ENSP00000470972,ENSP00000472985	RPS16,RPS19,RPS5,RPS6,RPS7
GO:0022618	ribonucleoprotein complex assembly	8	203	0.0064	ENSP00000296674,ENSP00000358140,ENSP00000363574,ENSP00000377681,ENSP00000412566,ENSP00000413436,ENSP00000470972,ENSP00000472985	EIF3A,EIF6,G3BP1,RPL10,RPS19,RPS23,RPS5,SNRPB
GO:0065008	regulation of biological quality	47	3559	0.0069	ENSP00000217131,ENSP00000226355,ENSP00000228825,ENSP00000232003,ENSP00000245185,ENSP00000246069,ENSP00000246194,ENSP00000254657,ENSP00000254722,ENSP00000261405,ENSP00000262455,ENSP00000263354,ENSP00000264690,ENSP00000273398,ENSP00000275603,ENSP00000283179,ENSP00000285379,ENSP00000286091,ENSP00000299427,ENSP00000301522,ENSP00000308753,ENSP00000312734,ENSP00000331544,ENSP00000339095,ENSP00000342026…	AFM,AGT,ALDOA,ARHGEF7,ARPC3,ATP6V1A,CA2,CCL5,CCT6A,CTSZ,DSTN,ERP44,FBLN1,GSTP1,HIST1H3A,HIST2H3A,HK1,HNRNPU,HRG,KLKB1,LTBP1,MT2A,NAPA,PDIA4,PER2,PRDX2,PRDX6,RAB8B,RAC1,RALY,RPS19,RPS5,RPS6,RPS7,S100A8,S100A9,SERPINF1,SH3BP1,SLC25A5,SOD2,SYNCRIP,TEK,TMOD3,TPP1,TPT1,VWF,XRCC6
GO:0070488	neutrophil aggregation	2	2	0.0076	ENSP00000357722,ENSP00000357727	S100A8,S100A9
GO:0032268	regulation of cellular protein metabolic process	36	2486	0.0079	ENSP00000012443,ENSP00000176763,ENSP00000216802,ENSP00000217131,ENSP00000232003,ENSP00000254480,ENSP00000254657,ENSP00000254722,ENSP00000264690,ENSP00000291568,ENSP00000310842,ENSP00000318195,ENSP00000326381,ENSP00000331544,ENSP00000332706,ENSP00000339095,ENSP00000346037,ENSP00000348461,ENSP00000352257,ENSP00000355627,ENSP00000357722,ENSP00000357727,ENSP00000358140,ENSP00000358635,ENSP00000362744…	AGT,CCL5,CSTB,CTSZ,EIF3A,EIF4A2,EIF6,FANCI,FBLN1,GSTP1,H2AFY,HRG,ITIH3,KLKB1,NCL,NUB1,PER2,PPP5C,PSME2,PURA,RAC1,RBM3,RPL10,RPL13A,RPL26,RPLP1,RPS4X,RPS7,S100A8,S100A9,SERPINF1,SMARCC1,STK10,SYNCRIP,TEK,XRCC6
GO:0030162	regulation of proteolysis	16	742	0.0083	ENSP00000216802,ENSP00000217131,ENSP00000232003,ENSP00000247153,ENSP00000254480,ENSP00000254722,ENSP00000264690,ENSP00000291568,ENSP00000331544,ENSP00000339095,ENSP00000355627,ENSP00000357722,ENSP00000357727,ENSP00000364016,ENSP00000415769,ENSP00000454264	AGT,CFP,CSTB,CTSZ,FBLN1,HRG,ITIH3,KLKB1,NUB1,PSMB8,PSME2,RPS7,S100A8,S100A9,SERPINF1,SMARCC1
GO:0050896	response to stimulus	85	7824	0.0083	ENSP00000012443,ENSP00000176763,ENSP00000207549,ENSP00000216802,ENSP00000217131,ENSP00000222247,ENSP00000222381,ENSP00000225792,ENSP00000228740,ENSP00000228825,ENSP00000232003,ENSP00000236671,ENSP00000245185,ENSP00000247153,ENSP00000254480,ENSP00000254657,ENSP00000254722,ENSP00000260402,ENSP00000261405,ENSP00000262428,ENSP00000262455,ENSP00000264380,ENSP00000264690,ENSP00000264710,ENSP00000267884…	AGT,ALDOA,ARHGEF7,ARPC3,ATP6V1A,AZGP1,C9orf142,CA2,CCL5,CDC5L,CFP,COTL1,CRIP1,CSTB,CTSD,CTSZ,DDX17,DDX5,EEF1B2,EIF6,ERP44,FANCI,FBLN1,G3BP1,GGCT,GSTP1,H2AFX,HINT1,HIST1H3A,HIST2H3A,HNRNPM,HNRNPU,HRG,ITGB1,KLKB1,LSP1,LTA4H,LTBP1,MATR3,MNDA,MT2A,NCL,NUB1,PCBP2,PDIA4,PER2,PGLYRP2,PIKFYVE,PLCB2,PON1,PPP5C,PRDX2,PRDX6,PSMB8,PSMD2,PSME2,RAB10,RAC1,RPL10A,RPL13A,RPL15,RPL18A,RPL26,RPS19,RPS6,RRM1,S100A6…
GO:0000380	alternative mRNA splicing, via spliceosome	3	16	0.0088	ENSP00000225792,ENSP00000325376,ENSP00000380033	DDX17,DDX5,HNRNPM
GO:0034622	cellular protein-containing complex assembly	17	832	0.0097	ENSP00000296674,ENSP00000306362,ENSP00000339566,ENSP00000348461,ENSP00000358140,ENSP00000363574,ENSP00000377681,ENSP00000378721,ENSP00000385479,ENSP00000412566,ENSP00000413436,ENSP00000423563,ENSP00000434024,ENSP00000460885,ENSP00000470972,ENSP00000472985,ENSP00000480826	EIF3A,EIF6,ENSG00000103426,G3BP1,H2AFX,H2AFY,HIST1H1C,HIST1H3A,HIST2H3A,RAC1,RPL10,RPS19,RPS23,RPS5,SEC31A,SNRPB,TBCA
GO:0010033	response to organic substance	39	2815	0.0099	ENSP00000012443,ENSP00000216802,ENSP00000222381,ENSP00000225792,ENSP00000228825,ENSP00000245185,ENSP00000254480,ENSP00000254722,ENSP00000262455,ENSP00000264710,ENSP00000273398,ENSP00000283179,ENSP00000285379,ENSP00000299427,ENSP00000309334,ENSP00000318195,ENSP00000325376,ENSP00000332449,ENSP00000355627,ENSP00000357722,ENSP00000358635,ENSP00000360532,ENSP00000360671,ENSP00000362820,ENSP00000363018…	AGT,ARPC3,ATP6V1A,CA2,CCL5,CDC5L,CRIP1,DDX17,DDX5,EEF1B2,EIF6,ERP44,GSTP1,HIST1H3A,HIST2H3A,HNRNPM,HNRNPU,ITGB1,MT2A,NCL,NUB1,PON1,PPP5C,PSMB8,PSME2,RAB10,RPL10A,RPL13A,RPL15,S100A8,SEC31A,SERPINF1,SLC25A5,SMARCC1,SOD2,SRSF3,SYNCRIP,TEK,TPP1
GO:0009636	response to toxic substance	12	468	0.01	ENSP00000012443,ENSP00000222381,ENSP00000301522,ENSP00000309334,ENSP00000342026,ENSP00000357722,ENSP00000357727,ENSP00000363018,ENSP00000376056,ENSP00000381607,ENSP00000446252,ENSP00000474412	CCL5,EEF1B2,GSTP1,PON1,PPP5C,PRDX2,PRDX6,RPL10A,RPL15,S100A8,S100A9,SOD2
GO:0034728	nucleosome organization	7	167	0.01	ENSP00000254480,ENSP00000264010,ENSP00000339566,ENSP00000385479,ENSP00000423563,ENSP00000434024,ENSP00000480826	CTCF,H2AFX,H2AFY,HIST1H1C,HIST1H3A,HIST2H3A,SMARCC1
GO:0048024	regulation of mRNA splicing, via spliceosome	5	77	0.01	ENSP00000225792,ENSP00000283179,ENSP00000342026,ENSP00000362820,ENSP00000380033	DDX17,DDX5,HNRNPU,PRDX6,SRSF3
GO:0006333	chromatin assembly or disassembly	7	174	0.0124	ENSP00000254480,ENSP00000264010,ENSP00000339566,ENSP00000385479,ENSP00000423563,ENSP00000434024,ENSP00000480826	CTCF,H2AFX,H2AFY,HIST1H1C,HIST1H3A,HIST2H3A,SMARCC1
GO:0032269	negative regulation of cellular protein metabolic process	19	1014	0.0124	ENSP00000012443,ENSP00000217131,ENSP00000232003,ENSP00000254480,ENSP00000254657,ENSP00000254722,ENSP00000291568,ENSP00000318195,ENSP00000331544,ENSP00000332706,ENSP00000339095,ENSP00000355627,ENSP00000358140,ENSP00000358635,ENSP00000363574,ENSP00000375730,ENSP00000381607,ENSP00000415769,ENSP00000423563	AGT,CSTB,CTSZ,EIF3A,EIF6,FBLN1,GSTP1,H2AFY,HRG,ITIH3,NCL,PER2,PPP5C,PURA,RPL13A,RPS7,SERPINF1,SMARCC1,SYNCRIP
GO:0098869	cellular oxidant detoxification	5	86	0.0155	ENSP00000301522,ENSP00000342026,ENSP00000357727,ENSP00000381607,ENSP00000446252	GSTP1,PRDX2,PRDX6,S100A9,SOD2
GO:0050832	defense response to fungus	4	49	0.0159	ENSP00000232003,ENSP00000262428,ENSP00000357722,ENSP00000357727	COTL1,HRG,S100A8,S100A9
GO:1901798	positive regulation of signal transduction by p53 class mediator	3	21	0.0166	ENSP00000225792,ENSP00000339095,ENSP00000463784	DDX5,RPL26,RPS7
GO:0032119	sequestering of zinc ion	2	4	0.017	ENSP00000357722,ENSP00000357727	S100A8,S100A9
GO:1902255	positive regulation of intrinsic apoptotic signaling pathway by p53 class mediator	2	4	0.017	ENSP00000339095,ENSP00000463784	RPL26,RPS7
GO:0044403	symbiont process	14	650	0.0175	ENSP00000326381,ENSP00000331544,ENSP00000345968,ENSP00000346762,ENSP00000348461,ENSP00000352257,ENSP00000352438,ENSP00000358140,ENSP00000358635,ENSP00000360671,ENSP00000364016,ENSP00000379350,ENSP00000434024,ENSP00000474412	CCL5,EIF3A,EIF4A2,FBLN1,H2AFX,ITGB1,PCBP2,PGLYRP2,PSMB8,RAC1,SLC25A5,SND1,SYNCRIP,XRCC6
GO:0010043	response to zinc ion	4	52	0.0189	ENSP00000245185,ENSP00000285379,ENSP00000332449,ENSP00000357722	CA2,CRIP1,MT2A,S100A8
GO:0042592	homeostatic process	24	1491	0.019	ENSP00000245185,ENSP00000246194,ENSP00000254722,ENSP00000262455,ENSP00000273398,ENSP00000285379,ENSP00000286091,ENSP00000299427,ENSP00000301522,ENSP00000308753,ENSP00000342026,ENSP00000348461,ENSP00000352257,ENSP00000355627,ENSP00000357722,ENSP00000357727,ENSP00000369757,ENSP00000378669,ENSP00000381607,ENSP00000402103,ENSP00000446252,ENSP00000470972,ENSP00000474412,ENSP00000477781	AGT,ALDOA,ATP6V1A,CA2,CCL5,ERP44,GSTP1,HK1,MT2A,PDIA4,PRDX2,PRDX6,RAC1,RALY,RPS19,RPS6,S100A8,S100A9,SERPINF1,SOD2,TMOD3,TPP1,TPT1,XRCC6
GO:0051259	protein complex oligomerization	12	512	0.0196	ENSP00000012443,ENSP00000168216,ENSP00000261405,ENSP00000300738,ENSP00000352257,ENSP00000367263,ENSP00000369375,ENSP00000378669,ENSP00000446252,ENSP00000470972,ENSP00000474412,ENSP00000480826	AHNAK,ALDOA,CCL5,HIST1H3A,HSD17B10,PPP5C,RPS19,RRM1,SOD2,TEK,VWF,XRCC6
GO:0032508	DNA duplex unwinding	4	53	0.0198	ENSP00000332706,ENSP00000349508,ENSP00000352257,ENSP00000377681	CHD4,G3BP1,PURA,XRCC6
GO:0040029	regulation of gene expression, epigenetic	8	251	0.0209	ENSP00000264010,ENSP00000283179,ENSP00000308405,ENSP00000363574,ENSP00000385479,ENSP00000423563,ENSP00000434024,ENSP00000480826	CTCF,EIF6,H2AFV,H2AFX,H2AFY,HIST1H3A,HIST2H3A,HNRNPU
GO:0051894	positive regulation of focal adhesion assembly	3	24	0.0221	ENSP00000232003,ENSP00000348461,ENSP00000369375	HRG,RAC1,TEK
GO:0070934	CRD-mediated mRNA stabilization	2	5	0.0223	ENSP00000283179,ENSP00000358635	HNRNPU,SYNCRIP
GO:2001244	positive regulation of intrinsic apoptotic signaling pathway	4	56	0.0232	ENSP00000339095,ENSP00000357722,ENSP00000357727,ENSP00000463784	RPL26,RPS7,S100A8,S100A9
GO:0031347	regulation of defense response	14	676	0.0234	ENSP00000247153,ENSP00000254722,ENSP00000264690,ENSP00000345968,ENSP00000352257,ENSP00000352438,ENSP00000354346,ENSP00000355627,ENSP00000357722,ENSP00000357727,ENSP00000369375,ENSP00000381607,ENSP00000470972,ENSP00000474412	AGT,CCL5,CFP,GSTP1,KLKB1,MATR3,PCBP2,PGLYRP2,RPS19,S100A8,S100A9,SERPINF1,TEK,XRCC6
GO:0045087	innate immune response	14	676	0.0234	ENSP00000207549,ENSP00000245185,ENSP00000247153,ENSP00000345968,ENSP00000352257,ENSP00000352438,ENSP00000354346,ENSP00000357722,ENSP00000357727,ENSP00000358635,ENSP00000364016,ENSP00000375730,ENSP00000454264,ENSP00000474412	CCL5,CFP,MATR3,MT2A,NUB1,PCBP2,PGLYRP2,PSMB8,RPL13A,S100A8,S100A9,SYNCRIP,UNC13D,XRCC6
GO:0007015	actin filament organization	7	200	0.024	ENSP00000228825,ENSP00000246069,ENSP00000308753,ENSP00000348461,ENSP00000350018,ENSP00000378669,ENSP00000460885	ALDOA,ARPC3,DSTN,ENSG00000103426,RAC1,SH3BP1,TMOD3
GO:0006342	chromatin silencing	5	98	0.0241	ENSP00000308405,ENSP00000385479,ENSP00000423563,ENSP00000434024,ENSP00000480826	H2AFV,H2AFX,H2AFY,HIST1H3A,HIST2H3A
GO:0009168	purine ribonucleoside monophosphate biosynthetic process	5	98	0.0241	ENSP00000286621,ENSP00000290299,ENSP00000361512,ENSP00000378669,ENSP00000402103	ADK,ALDOA,ATP5O,HK1,PRPS1
GO:0043065	positive regulation of apoptotic process	13	604	0.0241	ENSP00000217131,ENSP00000232003,ENSP00000339095,ENSP00000355627,ENSP00000357123,ENSP00000357722,ENSP00000357727,ENSP00000364893,ENSP00000369757,ENSP00000379350,ENSP00000446252,ENSP00000463784,ENSP00000474412	AGT,ARHGEF7,CCL5,CTSZ,HRG,ITGB1,MNDA,RPL26,RPS6,RPS7,S100A8,S100A9,SOD2
GO:0070887	cellular response to chemical stimulus	36	2672	0.0241	ENSP00000012443,ENSP00000216802,ENSP00000225792,ENSP00000228825,ENSP00000245185,ENSP00000254480,ENSP00000254722,ENSP00000264710,ENSP00000273398,ENSP00000283179,ENSP00000285379,ENSP00000299427,ENSP00000301522,ENSP00000318195,ENSP00000325376,ENSP00000332449,ENSP00000342026,ENSP00000348461,ENSP00000355627,ENSP00000357722,ENSP00000357727,ENSP00000358635,ENSP00000360532,ENSP00000360671,ENSP00000362820…	AGT,ARPC3,ATP6V1A,CA2,CCL5,CDC5L,CRIP1,DDX17,DDX5,GSTP1,HIST1H3A,HIST2H3A,HNRNPM,HNRNPU,ITGB1,MT2A,NCL,PPP5C,PRDX2,PRDX6,PSMB8,PSME2,RAB10,RAC1,RPL13A,RPS19,S100A8,S100A9,SEC31A,SERPINF1,SLC25A5,SMARCC1,SOD2,SRSF3,SYNCRIP,TPP1
GO:0042255	ribosome assembly	4	58	0.0249	ENSP00000363574,ENSP00000413436,ENSP00000470972,ENSP00000472985	EIF6,RPL10,RPS19,RPS5
GO:0048523	negative regulation of cellular process	53	4454	0.0249	ENSP00000012443,ENSP00000217131,ENSP00000225792,ENSP00000232003,ENSP00000254480,ENSP00000254657,ENSP00000254722,ENSP00000264010,ENSP00000283179,ENSP00000291568,ENSP00000292401,ENSP00000301522,ENSP00000308405,ENSP00000308753,ENSP00000310842,ENSP00000318195,ENSP00000326381,ENSP00000331544,ENSP00000332706,ENSP00000339095,ENSP00000339566,ENSP00000345968,ENSP00000346050,ENSP00000348461,ENSP00000348849…	AGT,ARHGEF7,AZGP1,CCL5,CDC5L,CSTB,CTCF,CTSZ,DDX5,EIF3A,EIF4A2,EIF6,FANCI,FBLN1,G3BP1,GSTP1,H2AFV,H2AFX,H2AFY,HIST1H1C,HIST1H3A,HIST2H3A,HNRNPU,HRG,ITGB1,ITIH3,LRRFIP1,LTBP1,MNDA,NCL,PER2,PGLYRP2,PPP5C,PRDX2,PURA,RAC1,RPL10,RPL13A,RPL26,RPS26,RPS3A,RPS6,RPS7,SERPINF1,SH3BP1,SLC25A5,SMARCC1,SOD2,SYNCRIP,TEK,TMOD3,TPT1,XRCC6
GO:0018119	peptidyl-cysteine S-nitrosylation	2	6	0.0269	ENSP00000357722,ENSP00000357727	S100A8,S100A9
GO:0071480	cellular response to gamma radiation	3	27	0.0271	ENSP00000352257,ENSP00000434024,ENSP00000463784	H2AFX,RPL26,XRCC6
GO:0072378	blood coagulation, fibrin clot formation	3	27	0.0271	ENSP00000261405,ENSP00000264690,ENSP00000331544	FBLN1,KLKB1,VWF
GO:0051172	negative regulation of nitrogen compound metabolic process	32	2307	0.0274	ENSP00000012443,ENSP00000217131,ENSP00000225792,ENSP00000232003,ENSP00000254480,ENSP00000254657,ENSP00000254722,ENSP00000264010,ENSP00000283179,ENSP00000291568,ENSP00000308405,ENSP00000318195,ENSP00000326381,ENSP00000331544,ENSP00000332706,ENSP00000339095,ENSP00000339566,ENSP00000348849,ENSP00000352257,ENSP00000355627,ENSP00000358140,ENSP00000358635,ENSP00000363574,ENSP00000375730,ENSP00000375857…	AGT,CSTB,CTCF,CTSZ,DDX5,EIF3A,EIF4A2,EIF6,FBLN1,GSTP1,H2AFV,H2AFX,H2AFY,HIST1H1C,HIST1H3A,HIST2H3A,HNRNPU,HRG,ITIH3,LRRFIP1,NCL,PER2,PPP5C,PURA,RPL10,RPL13A,RPS26,RPS7,SERPINF1,SMARCC1,SYNCRIP,XRCC6
GO:0097529	myeloid leukocyte migration	5	103	0.0274	ENSP00000348461,ENSP00000357722,ENSP00000357727,ENSP00000470972,ENSP00000474412	CCL5,RAC1,RPS19,S100A8,S100A9
GO:0031497	chromatin assembly	6	154	0.0283	ENSP00000264010,ENSP00000339566,ENSP00000385479,ENSP00000423563,ENSP00000434024,ENSP00000480826	CTCF,H2AFX,H2AFY,HIST1H1C,HIST1H3A,HIST2H3A
GO:0032787	monocarboxylic acid metabolic process	11	477	0.0303	ENSP00000221418,ENSP00000222381,ENSP00000228740,ENSP00000254657,ENSP00000270776,ENSP00000357535,ENSP00000378669,ENSP00000379386,ENSP00000380514,ENSP00000381607,ENSP00000402103	ALDOA,ECH1,ECHS1,GSTP1,HAGH,HK1,LDHB,LTA4H,PER2,PGD,PON1
GO:0080134	regulation of response to stress	21	1299	0.0316	ENSP00000225792,ENSP00000232003,ENSP00000247153,ENSP00000254722,ENSP00000264690,ENSP00000345968,ENSP00000352257,ENSP00000352438,ENSP00000354346,ENSP00000355627,ENSP00000357722,ENSP00000357727,ENSP00000369375,ENSP00000381607,ENSP00000423563,ENSP00000434024,ENSP00000446252,ENSP00000463784,ENSP00000470972,ENSP00000474412,ENSP00000477781	AGT,CCL5,CFP,DDX5,GSTP1,H2AFX,H2AFY,HRG,KLKB1,MATR3,PCBP2,PGLYRP2,RPL26,RPS19,S100A8,S100A9,SERPINF1,SOD2,TEK,TPT1,XRCC6
GO:0006167	AMP biosynthetic process	2	7	0.0324	ENSP00000286621,ENSP00000361512	ADK,PRPS1
GO:0010536	positive regulation of activation of Janus kinase activity	2	7	0.0324	ENSP00000355627,ENSP00000474412	AGT,CCL5
GO:0071692	protein localization to extracellular region	2	7	0.0324	ENSP00000226355,ENSP00000386043	AFM,LTBP1
GO:2001242	regulation of intrinsic apoptotic signaling pathway	6	159	0.0324	ENSP00000339095,ENSP00000357722,ENSP00000357727,ENSP00000446252,ENSP00000463784,ENSP00000477781	RPL26,RPS7,S100A8,S100A9,SOD2,TPT1
GO:0010811	positive regulation of cell-substrate adhesion	5	109	0.0328	ENSP00000207549,ENSP00000232003,ENSP00000331544,ENSP00000348461,ENSP00000369375	FBLN1,HRG,RAC1,TEK,UNC13D
GO:0045727	positive regulation of translation	5	110	0.034	ENSP00000362744,ENSP00000363574,ENSP00000365950,ENSP00000463784,ENSP00000474412	CCL5,EIF6,RBM3,RPL26,RPS4X
GO:0006090	pyruvate metabolic process	4	66	0.0345	ENSP00000378669,ENSP00000379386,ENSP00000380514,ENSP00000402103	ALDOA,HAGH,HK1,LDHB
GO:0052547	regulation of peptidase activity	10	420	0.0363	ENSP00000216802,ENSP00000232003,ENSP00000254722,ENSP00000291568,ENSP00000331544,ENSP00000355627,ENSP00000357722,ENSP00000357727,ENSP00000364016,ENSP00000415769	AGT,CSTB,FBLN1,HRG,ITIH3,PSMB8,PSME2,S100A8,S100A9,SERPINF1
GO:0019725	cellular homeostasis	15	806	0.037	ENSP00000245185,ENSP00000254722,ENSP00000262455,ENSP00000273398,ENSP00000285379,ENSP00000286091,ENSP00000301522,ENSP00000342026,ENSP00000355627,ENSP00000357722,ENSP00000357727,ENSP00000378669,ENSP00000402103,ENSP00000474412,ENSP00000477781	AGT,ALDOA,ATP6V1A,CA2,CCL5,ERP44,HK1,MT2A,PDIA4,PRDX2,PRDX6,S100A8,S100A9,SERPINF1,TPT1
GO:0045454	cell redox homeostasis	4	68	0.0377	ENSP00000262455,ENSP00000286091,ENSP00000301522,ENSP00000342026	ERP44,PDIA4,PRDX2,PRDX6
GO:0016032	viral process	12	571	0.0378	ENSP00000326381,ENSP00000331544,ENSP00000346762,ENSP00000348461,ENSP00000352257,ENSP00000352438,ENSP00000358140,ENSP00000358635,ENSP00000360671,ENSP00000364016,ENSP00000379350,ENSP00000434024	EIF3A,EIF4A2,FBLN1,H2AFX,ITGB1,PCBP2,PSMB8,RAC1,SLC25A5,SND1,SYNCRIP,XRCC6
GO:0010958	regulation of amino acid import across plasma membrane	2	8	0.038	ENSP00000254657,ENSP00000355627	AGT,PER2
GO:0030032	lamellipodium assembly	3	32	0.038	ENSP00000348461,ENSP00000364893,ENSP00000379350	ARHGEF7,ITGB1,RAC1
GO:0032101	regulation of response to external stimulus	14	732	0.0389	ENSP00000232003,ENSP00000247153,ENSP00000254722,ENSP00000264690,ENSP00000345968,ENSP00000348461,ENSP00000352438,ENSP00000355627,ENSP00000357722,ENSP00000357727,ENSP00000369375,ENSP00000381607,ENSP00000470972,ENSP00000474412	AGT,CCL5,CFP,GSTP1,HRG,KLKB1,PCBP2,PGLYRP2,RAC1,RPS19,S100A8,S100A9,SERPINF1,TEK
GO:0032103	positive regulation of response to external stimulus	8	291	0.0399	ENSP00000232003,ENSP00000264690,ENSP00000348461,ENSP00000355627,ENSP00000357722,ENSP00000357727,ENSP00000470972,ENSP00000474412	AGT,CCL5,HRG,KLKB1,RAC1,RPS19,S100A8,S100A9
GO:0017148	negative regulation of translation	5	117	0.0413	ENSP00000318195,ENSP00000332706,ENSP00000358635,ENSP00000363574,ENSP00000375730	EIF6,NCL,PURA,RPL13A,SYNCRIP
GO:0043434	response to peptide hormone	9	362	0.0423	ENSP00000254480,ENSP00000264710,ENSP00000273398,ENSP00000285379,ENSP00000355627,ENSP00000360532,ENSP00000363574,ENSP00000369375,ENSP00000381607	AGT,ATP6V1A,CA2,CDC5L,EIF6,GSTP1,RAB10,SMARCC1,TEK
GO:0051171	regulation of nitrogen compound metabolic process	64	5827	0.0424	ENSP00000012443,ENSP00000176763,ENSP00000216802,ENSP00000216832,ENSP00000217131,ENSP00000225792,ENSP00000232003,ENSP00000246194,ENSP00000247153,ENSP00000254480,ENSP00000254657,ENSP00000254722,ENSP00000264010,ENSP00000264690,ENSP00000275603,ENSP00000283179,ENSP00000291568,ENSP00000304229,ENSP00000308405,ENSP00000310129,ENSP00000310842,ENSP00000318195,ENSP00000326381,ENSP00000331544,ENSP00000332706…	AGT,AHNAK,CCL5,CCT6A,CDC5L,CFP,CHD4,CSTB,CTCF,CTSZ,DDX17,DDX5,EIF3A,EIF4A2,EIF6,EWSR1,FANCI,FBLN1,GSTP1,H2AFV,H2AFX,H2AFY,HINT1,HIST1H1C,HIST1H3A,HIST2H3A,HNRNPU,HRG,ITIH3,KLKB1,LRRFIP1,MNDA,NCL,NUB1,PER2,PNN,PPP5C,PRDX6,PSMB8,PSMD2,PSME2,PURA,RAC1,RALY,RBM3,RPL10,RPL13A,RPL26,RPLP1,RPS26,RPS4X,RPS7,S100A8,S100A9,SERPINF1,SMARCC1,SND1,SOD2,SRSF3,STK10,SYNCRIP,TEK,XRCC6,ZSCAN2
GO:0016584	nucleosome positioning	2	9	0.0438	ENSP00000264010,ENSP00000339566	CTCF,HIST1H1C
GO:0031349	positive regulation of defense response	9	365	0.0438	ENSP00000264690,ENSP00000345968,ENSP00000352257,ENSP00000354346,ENSP00000355627,ENSP00000357722,ENSP00000357727,ENSP00000470972,ENSP00000474412	AGT,CCL5,KLKB1,MATR3,PGLYRP2,RPS19,S100A8,S100A9,XRCC6
GO:0050729	positive regulation of inflammatory response	5	120	0.0442	ENSP00000264690,ENSP00000355627,ENSP00000357722,ENSP00000357727,ENSP00000470972	AGT,KLKB1,RPS19,S100A8,S100A9
GO:0098542	defense response to other organism	10	438	0.0446	ENSP00000207549,ENSP00000232003,ENSP00000247153,ENSP00000262428,ENSP00000345968,ENSP00000352438,ENSP00000357722,ENSP00000357727,ENSP00000380033,ENSP00000470972	CFP,COTL1,DDX17,HRG,PCBP2,PGLYRP2,RPS19,S100A8,S100A9,UNC13D
GO:0050778	positive regulation of immune response	12	589	0.0447	ENSP00000228825,ENSP00000232003,ENSP00000247153,ENSP00000345968,ENSP00000348461,ENSP00000352257,ENSP00000354346,ENSP00000357123,ENSP00000357722,ENSP00000357727,ENSP00000470972,ENSP00000474412	ARPC3,CCL5,CFP,HRG,MATR3,MNDA,PGLYRP2,RAC1,RPS19,S100A8,S100A9,XRCC6
GO:0072376	protein activation cascade	4	74	0.0462	ENSP00000247153,ENSP00000261405,ENSP00000264690,ENSP00000331544	CFP,FBLN1,KLKB1,VWF

## Sheet: GO CC
#term ID	term description	observed gene count	background gene count	false discovery rate	matching proteins in your network (IDs)	matching proteins in your network (labels)
GO:1990904	ribonucleoprotein complex	43	770	7.07e-21	ENSP00000168216,ENSP00000216832,ENSP00000221801,ENSP00000222247,ENSP00000225792,ENSP00000230050,ENSP00000246194,ENSP00000251453,ENSP00000265866,ENSP00000267884,ENSP00000283179,ENSP00000296674,ENSP00000307889,ENSP00000309334,ENSP00000318195,ENSP00000325376,ENSP00000339095,ENSP00000339795,ENSP00000346037,ENSP00000346050,ENSP00000346088,ENSP00000346762,ENSP00000348461,ENSP00000348849,ENSP00000358140…	CDC5L,DDX5,EIF3A,EIF6,FBL,G3BP1,HNRNPH3,HNRNPM,HNRNPU,HSD17B10,NCL,PNN,PSMA1,RAC1,RALY,RPL10,RPL10A,RPL13,RPL13A,RPL15,RPL18A,RPL22,RPL26,RPL32,RPL7,RPL7A,RPLP1,RPS12,RPS16,RPS19,RPS23,RPS25,RPS26,RPS29,RPS3A,RPS4X,RPS5,RPS6,RPS7,SND1,SNRPB,SRP14,SYNCRIP
GO:0022626	cytosolic ribosome	19	78	5.42e-19	ENSP00000222247,ENSP00000230050,ENSP00000251453,ENSP00000296674,ENSP00000307889,ENSP00000339095,ENSP00000346037,ENSP00000346050,ENSP00000348849,ENSP00000362744,ENSP00000363018,ENSP00000369757,ENSP00000379339,ENSP00000413436,ENSP00000416429,ENSP00000435096,ENSP00000463784,ENSP00000470972,ENSP00000472985	RPL10,RPL10A,RPL13,RPL18A,RPL26,RPL32,RPLP1,RPS12,RPS16,RPS19,RPS23,RPS25,RPS26,RPS29,RPS3A,RPS4X,RPS5,RPS6,RPS7
GO:0044445	cytosolic part	22	195	6.24e-16	ENSP00000222247,ENSP00000230050,ENSP00000251453,ENSP00000275603,ENSP00000296674,ENSP00000300738,ENSP00000307889,ENSP00000310129,ENSP00000339095,ENSP00000346037,ENSP00000346050,ENSP00000348849,ENSP00000362744,ENSP00000363018,ENSP00000369757,ENSP00000379339,ENSP00000413436,ENSP00000416429,ENSP00000435096,ENSP00000463784,ENSP00000470972,ENSP00000472985	CCT6A,PSMD2,RPL10,RPL10A,RPL13,RPL18A,RPL26,RPL32,RPLP1,RPS12,RPS16,RPS19,RPS23,RPS25,RPS26,RPS29,RPS3A,RPS4X,RPS5,RPS6,RPS7,RRM1
GO:0005840	ribosome	22	201	8.44e-16	ENSP00000222247,ENSP00000230050,ENSP00000251453,ENSP00000296674,ENSP00000307889,ENSP00000309334,ENSP00000339095,ENSP00000346037,ENSP00000346050,ENSP00000348849,ENSP00000361076,ENSP00000362744,ENSP00000363018,ENSP00000369757,ENSP00000375730,ENSP00000379339,ENSP00000413436,ENSP00000416429,ENSP00000435096,ENSP00000463784,ENSP00000470972,ENSP00000472985	RPL10,RPL10A,RPL13,RPL13A,RPL15,RPL18A,RPL26,RPL32,RPL7A,RPLP1,RPS12,RPS16,RPS19,RPS23,RPS25,RPS26,RPS29,RPS3A,RPS4X,RPS5,RPS6,RPS7
GO:0005829	cytosol	91	4958	2.09e-15	ENSP00000012443,ENSP00000207549,ENSP00000216038,ENSP00000216802,ENSP00000221418,ENSP00000221957,ENSP00000222247,ENSP00000228740,ENSP00000228825,ENSP00000230050,ENSP00000245185,ENSP00000251453,ENSP00000260402,ENSP00000263354,ENSP00000263697,ENSP00000264380,ENSP00000264710,ENSP00000267884,ENSP00000270776,ENSP00000273398,ENSP00000275428,ENSP00000275603,ENSP00000285208,ENSP00000285379,ENSP00000286621…	ADK,AGT,AHNAK,ALDOA,ARHGEF7,ARPC3,ATP6V1A,CA2,CCT6A,CSTB,DDX17,DNAJC8,ECH1,EEF1B2,EIF3A,EIF4A2,EIF6,ENSG00000103426,FANCI,G3BP1,GGCT,GSTP1,HAGH,HGFAC,HINT1,HK1,KIF21A,LDHB,LRRFIP1,LTA4H,MT2A,NAPA,NUB1,PCBP2,PGD,PIKFYVE,PLCB2,PLIN3,PPP5C,PRDX2,PRDX6,PRPS1,PSMA1,PSMB8,PSMD2,PSME2,RAB10,RAB6B,RAC1,RPL10,RPL10A,RPL13,RPL13A,RPL14,RPL15,RPL18A,RPL22,RPL26,RPL29,RPL32,RPL34,RPL37A,RPL7,RPL7A,RPLP1,RPS1…
GO:0044391	ribosomal subunit	18	152	1.88e-13	ENSP00000222247,ENSP00000230050,ENSP00000251453,ENSP00000296674,ENSP00000339095,ENSP00000346037,ENSP00000346050,ENSP00000348849,ENSP00000362744,ENSP00000363018,ENSP00000369757,ENSP00000375730,ENSP00000379339,ENSP00000413436,ENSP00000416429,ENSP00000435096,ENSP00000470972,ENSP00000472985	RPL10,RPL10A,RPL13A,RPL18A,RPL32,RPLP1,RPS12,RPS16,RPS19,RPS23,RPS25,RPS26,RPS29,RPS3A,RPS4X,RPS5,RPS6,RPS7
GO:0022627	cytosolic small ribosomal subunit	12	38	3.17e-13	ENSP00000230050,ENSP00000251453,ENSP00000296674,ENSP00000339095,ENSP00000346050,ENSP00000348849,ENSP00000362744,ENSP00000369757,ENSP00000379339,ENSP00000435096,ENSP00000470972,ENSP00000472985	RPS12,RPS16,RPS19,RPS23,RPS25,RPS26,RPS29,RPS3A,RPS4X,RPS5,RPS6,RPS7
GO:0070013	intracellular organelle lumen	87	5162	3.03e-12	ENSP00000012443,ENSP00000168216,ENSP00000207549,ENSP00000216038,ENSP00000216802,ENSP00000216832,ENSP00000217131,ENSP00000221418,ENSP00000221801,ENSP00000225792,ENSP00000228740,ENSP00000230050,ENSP00000232003,ENSP00000236671,ENSP00000247153,ENSP00000251453,ENSP00000254480,ENSP00000254657,ENSP00000261405,ENSP00000262428,ENSP00000262455,ENSP00000263697,ENSP00000264010,ENSP00000265866,ENSP00000267884…	ADK,ALDOA,CDC5L,CFP,CHD4,COTL1,CSTB,CTCF,CTSD,CTSZ,DBI,DDX17,DDX5,DNAJC8,ECH1,ECHS1,EIF3A,EIF4A2,EIF6,ERP44,EWSR1,FANCI,FBL,GSTP1,H2AFV,H2AFX,H2AFY,HAGH,HINT1,HIST1H1C,HIST1H3A,HIST2H3A,HNRNPH3,HNRNPM,HNRNPU,HRG,HSD17B10,ITIH3,LTA4H,LTBP1,MATR3,MNDA,NCL,PCBP2,PDIA4,PER2,PNN,PPP5C,PRDX6,PSMA1,PSMB8,PSMD2,PSME2,PURA,RAB8B,RBM3,RPL13,RPL26,RPS12,RPS16,RPS19,RPS23,RPS25,RPS26,RPS29,RPS3A,RPS4X,RPS5,R…
GO:0044424	intracellular part	150	13996	1.58e-11	ENSP00000012443,ENSP00000168216,ENSP00000176763,ENSP00000207549,ENSP00000216038,ENSP00000216802,ENSP00000216832,ENSP00000217131,ENSP00000221418,ENSP00000221801,ENSP00000221957,ENSP00000222247,ENSP00000222381,ENSP00000225792,ENSP00000228740,ENSP00000228825,ENSP00000230050,ENSP00000232003,ENSP00000236671,ENSP00000245185,ENSP00000246069,ENSP00000246194,ENSP00000247153,ENSP00000251453,ENSP00000254480…	ADK,AGT,AHNAK,ALDOA,ARHGEF7,ARPC3,ATP5O,ATP6V1A,C9orf142,CA2,CCL5,CCT6A,CDC5L,CDK17,CFP,CHD4,COTL1,CRIP1,CSTB,CTCF,CTSD,CTSZ,DBI,DDX17,DDX5,DNAJC8,DSTN,ECH1,ECHS1,EEF1B2,EIF3A,EIF4A2,EIF6,ENSG00000103426,ERP44,EWSR1,FANCI,FBL,G3BP1,GGCT,GSTP1,H2AFV,H2AFX,H2AFY,HAGH,HGFAC,HINT1,HIST1H1C,HIST1H3A,HIST2H3A,HK1,HNRNPH3,HNRNPM,HNRNPU,HRG,HSD17B10,ITGB1,ITIH3,KIF21A,LDHB,LRRFIP1,LSP1,LTA4H,LTBP1,MATR3,…
GO:0044444	cytoplasmic part	121	9377	1.82e-11	ENSP00000012443,ENSP00000168216,ENSP00000176763,ENSP00000207549,ENSP00000216038,ENSP00000216802,ENSP00000217131,ENSP00000221418,ENSP00000221957,ENSP00000222247,ENSP00000228740,ENSP00000228825,ENSP00000230050,ENSP00000232003,ENSP00000236671,ENSP00000245185,ENSP00000246069,ENSP00000247153,ENSP00000251453,ENSP00000254657,ENSP00000254722,ENSP00000260402,ENSP00000261405,ENSP00000262428,ENSP00000262455…	ADK,AGT,AHNAK,ALDOA,ARHGEF7,ARPC3,ATP5O,ATP6V1A,CA2,CCT6A,CDC5L,CFP,COTL1,CSTB,CTSD,CTSZ,DBI,DDX17,DNAJC8,DSTN,ECH1,ECHS1,EEF1B2,EIF3A,EIF4A2,EIF6,ENSG00000103426,ERP44,FANCI,G3BP1,GGCT,GSTP1,HAGH,HGFAC,HINT1,HK1,HNRNPU,HRG,HSD17B10,ITGB1,ITIH3,KIF21A,LDHB,LRRFIP1,LTA4H,LTBP1,MNDA,MT2A,NAPA,NCL,NUB1,PCBP2,PDIA4,PER2,PGD,PIKFYVE,PLCB2,PLIN3,PPP5C,PRDX2,PRDX6,PRPS1,PSMA1,PSMB8,PSMD2,PSME2,RAB10,RAB…
GO:0005622	intracellular	151	14286	2.85e-11	ENSP00000012443,ENSP00000168216,ENSP00000176763,ENSP00000207549,ENSP00000216038,ENSP00000216802,ENSP00000216832,ENSP00000217131,ENSP00000221418,ENSP00000221801,ENSP00000221957,ENSP00000222247,ENSP00000222381,ENSP00000225792,ENSP00000228740,ENSP00000228825,ENSP00000230050,ENSP00000232003,ENSP00000236671,ENSP00000245185,ENSP00000246069,ENSP00000246194,ENSP00000247153,ENSP00000251453,ENSP00000254480…	ADK,AGT,AHNAK,ALDOA,ARHGEF7,ARPC3,ATP5O,ATP6V1A,C9orf142,CA2,CCL5,CCT6A,CDC5L,CDK17,CFP,CHD4,COTL1,CRIP1,CSTB,CTCF,CTSD,CTSZ,DBI,DDX17,DDX5,DNAJC8,DSTN,ECH1,ECHS1,EEF1B2,EIF3A,EIF4A2,EIF6,ENSG00000103426,ERP44,EWSR1,FANCI,FBL,G3BP1,GGCT,GSTP1,H2AFV,H2AFX,H2AFY,HAGH,HGFAC,HINT1,HIST1H1C,HIST1H3A,HIST2H3A,HK1,HNRNPH3,HNRNPM,HNRNPU,HRG,HSD17B10,ITGB1,ITIH3,KIF21A,LDHB,LRRFIP1,LSP1,LTA4H,LTBP1,MATR3,…
GO:0005737	cytoplasm	133	11238	5.41e-11	ENSP00000012443,ENSP00000168216,ENSP00000176763,ENSP00000207549,ENSP00000216038,ENSP00000216802,ENSP00000217131,ENSP00000221418,ENSP00000221957,ENSP00000222247,ENSP00000225792,ENSP00000228740,ENSP00000228825,ENSP00000230050,ENSP00000232003,ENSP00000236671,ENSP00000245185,ENSP00000246069,ENSP00000247153,ENSP00000251453,ENSP00000254480,ENSP00000254657,ENSP00000254722,ENSP00000260402,ENSP00000261211…	ADK,AGT,AHNAK,ALDOA,ARHGEF7,ARPC3,ATP5O,ATP6V1A,CA2,CCL5,CCT6A,CDC5L,CDK17,CFP,CHD4,COTL1,CRIP1,CSTB,CTSD,CTSZ,DBI,DDX17,DDX5,DNAJC8,DSTN,ECH1,ECHS1,EEF1B2,EIF3A,EIF4A2,EIF6,ENSG00000103426,ERP44,EWSR1,FANCI,G3BP1,GGCT,GSTP1,HAGH,HGFAC,HINT1,HK1,HNRNPU,HRG,HSD17B10,ITGB1,ITIH3,KIF21A,LDHB,LRRFIP1,LTA4H,LTBP1,MNDA,MT2A,NAPA,NCL,NUB1,PCBP2,PDIA4,PER2,PGD,PIKFYVE,PLCB2,PLIN3,PPP5C,PRDX2,PRDX6,PRPS1,…
GO:0032991	protein-containing complex	79	4792	2.39e-10	ENSP00000012443,ENSP00000168216,ENSP00000216038,ENSP00000216802,ENSP00000216832,ENSP00000221801,ENSP00000222247,ENSP00000222381,ENSP00000225792,ENSP00000228825,ENSP00000230050,ENSP00000246194,ENSP00000251453,ENSP00000254480,ENSP00000263354,ENSP00000265866,ENSP00000267884,ENSP00000273398,ENSP00000275603,ENSP00000283179,ENSP00000290299,ENSP00000296674,ENSP00000300738,ENSP00000304229,ENSP00000307889…	ARHGEF7,ARPC3,ATP5O,ATP6V1A,C9orf142,CCT6A,CDC5L,CHD4,DDX5,EEF1B2,EIF3A,EIF4A2,EIF6,FBL,G3BP1,GSTP1,H2AFV,H2AFX,H2AFY,HINT1,HIST1H1C,HIST1H3A,HIST2H3A,HNRNPH3,HNRNPM,HNRNPU,HPR,HSD17B10,ITGB1,KIF21A,LTBP1,NAPA,NCL,PNN,PON1,PPP5C,PRPS1,PSMA1,PSMB8,PSMD2,PSME2,PURA,RAC1,RALY,RPL10,RPL10A,RPL13,RPL13A,RPL15,RPL18A,RPL22,RPL26,RPL32,RPL7,RPL7A,RPLP1,RPS12,RPS16,RPS19,RPS23,RPS25,RPS26,RPS29,RPS3A,RPS…
GO:0044422	organelle part	116	9111	4.42e-10	ENSP00000012443,ENSP00000168216,ENSP00000176763,ENSP00000207549,ENSP00000216038,ENSP00000216802,ENSP00000216832,ENSP00000217131,ENSP00000221418,ENSP00000221801,ENSP00000221957,ENSP00000222247,ENSP00000225792,ENSP00000228740,ENSP00000228825,ENSP00000230050,ENSP00000232003,ENSP00000236671,ENSP00000246069,ENSP00000246194,ENSP00000247153,ENSP00000251453,ENSP00000254480,ENSP00000254657,ENSP00000261405…	ADK,AHNAK,ALDOA,ARPC3,ATP5O,C9orf142,CCT6A,CDC5L,CFP,CHD4,COTL1,CSTB,CTCF,CTSD,CTSZ,DBI,DDX17,DDX5,DNAJC8,DSTN,ECH1,ECHS1,EIF3A,EIF4A2,EIF6,ENSG00000103426,ERP44,EWSR1,FANCI,FBL,GSTP1,H2AFV,H2AFX,H2AFY,HAGH,HINT1,HIST1H1C,HIST1H3A,HIST2H3A,HK1,HNRNPH3,HNRNPM,HNRNPU,HRG,HSD17B10,ITIH3,KIF21A,LTA4H,LTBP1,MATR3,MNDA,NAPA,NCL,PCBP2,PDIA4,PER2,PIKFYVE,PLIN3,PNN,PPP5C,PRDX6,PSMA1,PSMB8,PSMD2,PSME2,PURA…
GO:0044446	intracellular organelle part	114	8882	5.43e-10	ENSP00000012443,ENSP00000168216,ENSP00000176763,ENSP00000207549,ENSP00000216038,ENSP00000216802,ENSP00000216832,ENSP00000217131,ENSP00000221418,ENSP00000221801,ENSP00000221957,ENSP00000222247,ENSP00000225792,ENSP00000228740,ENSP00000228825,ENSP00000230050,ENSP00000232003,ENSP00000236671,ENSP00000246069,ENSP00000246194,ENSP00000247153,ENSP00000251453,ENSP00000254480,ENSP00000254657,ENSP00000261405…	ADK,ALDOA,ARPC3,ATP5O,C9orf142,CCT6A,CDC5L,CFP,CHD4,COTL1,CSTB,CTCF,CTSD,CTSZ,DBI,DDX17,DDX5,DNAJC8,DSTN,ECH1,ECHS1,EIF3A,EIF4A2,EIF6,ENSG00000103426,ERP44,EWSR1,FANCI,FBL,GSTP1,H2AFV,H2AFX,H2AFY,HAGH,HINT1,HIST1H1C,HIST1H3A,HIST2H3A,HK1,HNRNPH3,HNRNPM,HNRNPU,HRG,HSD17B10,ITIH3,KIF21A,LTA4H,LTBP1,MATR3,MNDA,NAPA,NCL,PCBP2,PDIA4,PER2,PIKFYVE,PLIN3,PNN,PPP5C,PRDX6,PSMA1,PSMB8,PSMD2,PSME2,PURA,RAB10…
GO:0043232	intracellular non-membrane-bounded organelle	70	4005	5.83e-10	ENSP00000216832,ENSP00000221801,ENSP00000221957,ENSP00000222247,ENSP00000225792,ENSP00000228825,ENSP00000230050,ENSP00000246069,ENSP00000251453,ENSP00000254480,ENSP00000254657,ENSP00000262428,ENSP00000264010,ENSP00000275603,ENSP00000283179,ENSP00000291568,ENSP00000296674,ENSP00000304229,ENSP00000305675,ENSP00000306362,ENSP00000307889,ENSP00000308405,ENSP00000308753,ENSP00000309334,ENSP00000318195…	AHNAK,ALDOA,ARPC3,C9orf142,CCT6A,CHD4,COTL1,CSTB,CTCF,DDX17,DDX5,DSTN,EIF3A,EIF4A2,EIF6,EWSR1,FBL,G3BP1,H2AFV,H2AFX,H2AFY,HINT1,HIST1H1C,HIST1H3A,HIST2H3A,HNRNPM,HNRNPU,KIF21A,LRRFIP1,LSP1,MNDA,NCL,PER2,PLIN3,PNN,PSMA1,PURA,RAC1,RBM3,RPL10,RPL10A,RPL13,RPL13A,RPL15,RPL18A,RPL26,RPL32,RPL7A,RPLP1,RPS12,RPS16,RPS19,RPS23,RPS25,RPS26,RPS29,RPS3A,RPS4X,RPS5,RPS6,RPS7,S100A8,S100A9,SDPR,SLC25A5,SMARCC…
GO:0034774	secretory granule lumen	19	323	9.64e-10	ENSP00000207549,ENSP00000217131,ENSP00000232003,ENSP00000236671,ENSP00000247153,ENSP00000261405,ENSP00000262428,ENSP00000262455,ENSP00000267884,ENSP00000291568,ENSP00000310129,ENSP00000342026,ENSP00000352257,ENSP00000357123,ENSP00000357722,ENSP00000357727,ENSP00000378669,ENSP00000381607,ENSP00000415769	ALDOA,CFP,COTL1,CSTB,CTSD,CTSZ,ERP44,GSTP1,HRG,ITIH3,MNDA,PRDX6,PSMD2,S100A8,S100A9,SRP14,UNC13D,VWF,XRCC6
GO:0005844	polysome	10	66	1.06e-08	ENSP00000222247,ENSP00000296674,ENSP00000348849,ENSP00000361076,ENSP00000362744,ENSP00000363018,ENSP00000369757,ENSP00000379339,ENSP00000414359,ENSP00000416429	PSMA1,RPL10A,RPL18A,RPL32,RPL7A,RPS23,RPS26,RPS29,RPS4X,RPS6
GO:0043229	intracellular organelle	133	12193	7.2e-08	ENSP00000012443,ENSP00000168216,ENSP00000176763,ENSP00000207549,ENSP00000216038,ENSP00000216802,ENSP00000216832,ENSP00000217131,ENSP00000221418,ENSP00000221801,ENSP00000221957,ENSP00000222247,ENSP00000222381,ENSP00000225792,ENSP00000228740,ENSP00000228825,ENSP00000230050,ENSP00000232003,ENSP00000236671,ENSP00000245185,ENSP00000246069,ENSP00000246194,ENSP00000247153,ENSP00000251453,ENSP00000254480…	ADK,AHNAK,ALDOA,ARHGEF7,ARPC3,ATP5O,C9orf142,CCT6A,CDC5L,CDK17,CFP,CHD4,COTL1,CSTB,CTCF,CTSD,CTSZ,DBI,DDX17,DDX5,DNAJC8,DSTN,ECH1,ECHS1,EIF3A,EIF4A2,EIF6,ENSG00000103426,ERP44,EWSR1,FANCI,FBL,G3BP1,GSTP1,H2AFV,H2AFX,H2AFY,HAGH,HINT1,HIST1H1C,HIST1H3A,HIST2H3A,HK1,HNRNPH3,HNRNPM,HNRNPU,HRG,HSD17B10,ITGB1,ITIH3,KIF21A,LRRFIP1,LSP1,LTA4H,LTBP1,MATR3,MNDA,MT2A,NAPA,NCL,NUB1,PCBP2,PDIA4,PER2,PIKFYVE,P…
GO:1904813	ficolin-1-rich granule lumen	11	125	2.5e-07	ENSP00000217131,ENSP00000228740,ENSP00000236671,ENSP00000262428,ENSP00000267884,ENSP00000291568,ENSP00000310129,ENSP00000352257,ENSP00000357123,ENSP00000378669,ENSP00000381607	ALDOA,COTL1,CSTB,CTSD,CTSZ,GSTP1,LTA4H,MNDA,PSMD2,SRP14,XRCC6
GO:0042788	polysomal ribosome	7	30	2.9e-07	ENSP00000222247,ENSP00000296674,ENSP00000348849,ENSP00000361076,ENSP00000363018,ENSP00000379339,ENSP00000416429	RPL10A,RPL18A,RPL32,RPL7A,RPS23,RPS26,RPS29
GO:0031981	nuclear lumen	63	4030	6.66e-07	ENSP00000012443,ENSP00000216038,ENSP00000216802,ENSP00000216832,ENSP00000221801,ENSP00000225792,ENSP00000228740,ENSP00000230050,ENSP00000251453,ENSP00000254480,ENSP00000254657,ENSP00000263697,ENSP00000264010,ENSP00000265866,ENSP00000283179,ENSP00000286621,ENSP00000291568,ENSP00000296674,ENSP00000304229,ENSP00000305675,ENSP00000306362,ENSP00000307889,ENSP00000308405,ENSP00000310129,ENSP00000310842…	ADK,CDC5L,CHD4,CSTB,CTCF,DDX17,DDX5,DNAJC8,EIF3A,EIF4A2,EIF6,EWSR1,FANCI,FBL,H2AFV,H2AFX,H2AFY,HINT1,HIST1H1C,HIST1H3A,HIST2H3A,HNRNPH3,HNRNPM,HNRNPU,LTA4H,MATR3,MNDA,NCL,PCBP2,PER2,PNN,PPP5C,PSMA1,PSMB8,PSMD2,PSME2,PURA,RAB8B,RBM3,RPL13,RPL26,RPS12,RPS16,RPS19,RPS23,RPS25,RPS26,RPS29,RPS3A,RPS4X,RPS5,RPS6,RPS7,RTCB,S100A9,SDHB,SDPR,SMARCC1,SNRPB,SRSF3,SYNCRIP,TBCA,XRCC6
GO:0044428	nuclear part	66	4359	8.59e-07	ENSP00000012443,ENSP00000216038,ENSP00000216802,ENSP00000216832,ENSP00000221801,ENSP00000225792,ENSP00000228740,ENSP00000230050,ENSP00000246194,ENSP00000251453,ENSP00000254480,ENSP00000254657,ENSP00000263697,ENSP00000264010,ENSP00000265866,ENSP00000283179,ENSP00000286621,ENSP00000291568,ENSP00000296674,ENSP00000300738,ENSP00000304229,ENSP00000305675,ENSP00000306362,ENSP00000307889,ENSP00000308405…	ADK,CDC5L,CHD4,CSTB,CTCF,DDX17,DDX5,DNAJC8,EIF3A,EIF4A2,EIF6,EWSR1,FANCI,FBL,H2AFV,H2AFX,H2AFY,HINT1,HIST1H1C,HIST1H3A,HIST2H3A,HNRNPH3,HNRNPM,HNRNPU,LTA4H,MATR3,MNDA,NCL,PCBP2,PER2,PNN,PPP5C,PSMA1,PSMB8,PSMD2,PSME2,PURA,RAB8B,RALY,RBM3,RPL13,RPL26,RPS12,RPS16,RPS19,RPS23,RPS25,RPS26,RPS29,RPS3A,RPS4X,RPS5,RPS6,RPS7,RRM1,RTCB,S100A6,S100A9,SDHB,SDPR,SMARCC1,SNRPB,SRSF3,SYNCRIP,TBCA,XRCC6
GO:0101002	ficolin-1-rich granule	12	186	1.14e-06	ENSP00000217131,ENSP00000228740,ENSP00000236671,ENSP00000262428,ENSP00000267884,ENSP00000291568,ENSP00000310129,ENSP00000348461,ENSP00000352257,ENSP00000357123,ENSP00000378669,ENSP00000381607	ALDOA,COTL1,CSTB,CTSD,CTSZ,GSTP1,LTA4H,MNDA,PSMD2,RAC1,SRP14,XRCC6
GO:0030141	secretory granule	24	828	1.34e-06	ENSP00000176763,ENSP00000207549,ENSP00000217131,ENSP00000228740,ENSP00000232003,ENSP00000236671,ENSP00000247153,ENSP00000261405,ENSP00000262428,ENSP00000262455,ENSP00000264710,ENSP00000267884,ENSP00000291568,ENSP00000310129,ENSP00000312734,ENSP00000342026,ENSP00000348461,ENSP00000352257,ENSP00000357123,ENSP00000357722,ENSP00000357727,ENSP00000378669,ENSP00000381607,ENSP00000415769	ALDOA,CFP,COTL1,CSTB,CTSD,CTSZ,ERP44,GSTP1,HRG,ITIH3,LTA4H,MNDA,PRDX6,PSMD2,RAB10,RAB8B,RAC1,S100A8,S100A9,SRP14,STK10,UNC13D,VWF,XRCC6
GO:0044464	cell part	153	16244	4.09e-06	ENSP00000012443,ENSP00000168216,ENSP00000176763,ENSP00000207549,ENSP00000216038,ENSP00000216802,ENSP00000216832,ENSP00000217131,ENSP00000221418,ENSP00000221801,ENSP00000221957,ENSP00000222247,ENSP00000222381,ENSP00000225792,ENSP00000228740,ENSP00000228825,ENSP00000230050,ENSP00000232003,ENSP00000236671,ENSP00000245185,ENSP00000246069,ENSP00000246194,ENSP00000247153,ENSP00000251453,ENSP00000254480…	ADK,AGT,AHNAK,ALDOA,ARHGEF7,ARPC3,ATP5O,ATP6V1A,AZGP1,C9orf142,CA2,CCL5,CCT6A,CDC5L,CDK17,CFP,CHD4,COTL1,CRIP1,CSTB,CTCF,CTSD,CTSZ,DBI,DDX17,DDX5,DNAJC8,DSTN,ECH1,ECHS1,EEF1B2,EIF3A,EIF4A2,EIF6,ENSG00000103426,ERP44,EWSR1,FANCI,FBL,G3BP1,GGCT,GSTP1,H2AFV,H2AFX,H2AFY,HAGH,HGFAC,HINT1,HIST1H1C,HIST1H3A,HIST2H3A,HK1,HNRNPH3,HNRNPM,HNRNPU,HRG,HSD17B10,ITGB1,ITIH3,KIF21A,KLKB1,LDHB,LRRFIP1,LSP1,LTA4H,…
GO:0005730	nucleolus	24	926	8.9e-06	ENSP00000221801,ENSP00000225792,ENSP00000254657,ENSP00000264010,ENSP00000291568,ENSP00000306362,ENSP00000307889,ENSP00000318195,ENSP00000325376,ENSP00000326381,ENSP00000339095,ENSP00000346050,ENSP00000352257,ENSP00000357123,ENSP00000358140,ENSP00000363574,ENSP00000365950,ENSP00000369757,ENSP00000380033,ENSP00000400142,ENSP00000423563,ENSP00000435096,ENSP00000463784,ENSP00000470972	CSTB,CTCF,DDX17,DDX5,EIF3A,EIF4A2,EIF6,EWSR1,FBL,H2AFY,HNRNPM,MNDA,NCL,PER2,RBM3,RPL13,RPL26,RPS19,RPS25,RPS3A,RPS6,RPS7,TBCA,XRCC6
GO:0043231	intracellular membrane-bounded organelle	114	10365	1.53e-05	ENSP00000012443,ENSP00000168216,ENSP00000207549,ENSP00000216038,ENSP00000216802,ENSP00000216832,ENSP00000217131,ENSP00000221418,ENSP00000221801,ENSP00000221957,ENSP00000222381,ENSP00000225792,ENSP00000228740,ENSP00000230050,ENSP00000232003,ENSP00000236671,ENSP00000245185,ENSP00000246194,ENSP00000247153,ENSP00000251453,ENSP00000254480,ENSP00000254657,ENSP00000261211,ENSP00000261405,ENSP00000262428…	ADK,AHNAK,ARHGEF7,ATP5O,C9orf142,CDC5L,CDK17,CFP,CHD4,COTL1,CSTB,CTCF,CTSD,CTSZ,DBI,DDX17,DDX5,DNAJC8,ECH1,ECHS1,EIF3A,EIF4A2,EIF6,ENSG00000103426,ERP44,EWSR1,FANCI,FBL,G3BP1,GSTP1,H2AFV,H2AFX,H2AFY,HAGH,HINT1,HIST1H1C,HIST1H3A,HIST2H3A,HK1,HNRNPH3,HNRNPM,HNRNPU,HRG,HSD17B10,LRRFIP1,LTA4H,LTBP1,MATR3,MNDA,MT2A,NAPA,NCL,NUB1,PCBP2,PDIA4,PER2,PIKFYVE,PLIN3,PNN,PON1,PPP5C,PRDX6,PSMA1,PSMB8,PSMD2,PSM…
GO:0043227	membrane-bounded organelle	120	11244	2.32e-05	ENSP00000012443,ENSP00000168216,ENSP00000176763,ENSP00000207549,ENSP00000216038,ENSP00000216802,ENSP00000216832,ENSP00000217131,ENSP00000221418,ENSP00000221801,ENSP00000221957,ENSP00000222381,ENSP00000225792,ENSP00000228740,ENSP00000230050,ENSP00000232003,ENSP00000236671,ENSP00000245185,ENSP00000246194,ENSP00000247153,ENSP00000251453,ENSP00000254480,ENSP00000254657,ENSP00000254722,ENSP00000261211…	ADK,AHNAK,ALDOA,ARHGEF7,ATP5O,C9orf142,CDC5L,CDK17,CFP,CHD4,COTL1,CSTB,CTCF,CTSD,CTSZ,DBI,DDX17,DDX5,DNAJC8,ECH1,ECHS1,EIF3A,EIF4A2,EIF6,ENSG00000103426,ERP44,EWSR1,FANCI,FBL,G3BP1,GSTP1,H2AFV,H2AFX,H2AFY,HAGH,HINT1,HIST1H1C,HIST1H3A,HIST2H3A,HK1,HNRNPH3,HNRNPM,HNRNPU,HRG,HSD17B10,ITGB1,ITIH3,LRRFIP1,LTA4H,LTBP1,MATR3,MNDA,MT2A,NAPA,NCL,NUB1,PCBP2,PDIA4,PER2,PIKFYVE,PLIN3,PNN,PON1,PPP5C,PRDX6,PSM…
GO:0071013	catalytic step 2 spliceosome	8	99	3.06e-05	ENSP00000216832,ENSP00000225792,ENSP00000246194,ENSP00000283179,ENSP00000325376,ENSP00000358635,ENSP00000360532,ENSP00000412566	CDC5L,DDX5,HNRNPM,HNRNPU,PNN,RALY,SNRPB,SYNCRIP
GO:0005634	nucleus	84	6892	5.5e-05	ENSP00000012443,ENSP00000216038,ENSP00000216802,ENSP00000216832,ENSP00000221801,ENSP00000225792,ENSP00000228740,ENSP00000230050,ENSP00000245185,ENSP00000246194,ENSP00000251453,ENSP00000254480,ENSP00000254657,ENSP00000261211,ENSP00000262428,ENSP00000263697,ENSP00000264010,ENSP00000265866,ENSP00000267884,ENSP00000283179,ENSP00000286621,ENSP00000291568,ENSP00000296674,ENSP00000300738,ENSP00000304229…	ADK,AHNAK,C9orf142,CDC5L,CDK17,CHD4,COTL1,CSTB,CTCF,DDX17,DDX5,DNAJC8,EIF3A,EIF4A2,EIF6,EWSR1,FANCI,FBL,G3BP1,GSTP1,H2AFV,H2AFX,H2AFY,HINT1,HIST1H1C,HIST1H3A,HIST2H3A,HNRNPH3,HNRNPM,HNRNPU,LRRFIP1,LTA4H,MATR3,MNDA,MT2A,NCL,NUB1,PCBP2,PER2,PNN,PPP5C,PRDX6,PSMA1,PSMB8,PSMD2,PSME2,PURA,RAB8B,RALY,RBM3,RPL10,RPL13,RPL15,RPL22,RPL26,RPS12,RPS16,RPS19,RPS23,RPS25,RPS26,RPS29,RPS3A,RPS4X,RPS5,RPS6,RPS7,…
GO:0005654	nucleoplasm	51	3446	9.26e-05	ENSP00000012443,ENSP00000216038,ENSP00000216802,ENSP00000216832,ENSP00000221801,ENSP00000225792,ENSP00000228740,ENSP00000230050,ENSP00000251453,ENSP00000254480,ENSP00000263697,ENSP00000264010,ENSP00000265866,ENSP00000283179,ENSP00000286621,ENSP00000296674,ENSP00000304229,ENSP00000305675,ENSP00000310129,ENSP00000310842,ENSP00000312734,ENSP00000318195,ENSP00000325376,ENSP00000339095,ENSP00000346050…	ADK,CDC5L,CHD4,CTCF,DDX17,DDX5,DNAJC8,EIF6,FANCI,FBL,H2AFX,HINT1,HIST1H3A,HIST2H3A,HNRNPH3,HNRNPM,HNRNPU,LTA4H,MNDA,NCL,PCBP2,PNN,PPP5C,PSMA1,PSMB8,PSMD2,PSME2,RAB8B,RBM3,RPL26,RPS12,RPS16,RPS19,RPS23,RPS25,RPS26,RPS29,RPS3A,RPS4X,RPS5,RPS6,RPS7,RTCB,S100A9,SDHB,SDPR,SMARCC1,SNRPB,SRSF3,SYNCRIP,XRCC6
GO:0022625	cytosolic large ribosomal subunit	5	32	0.00013	ENSP00000222247,ENSP00000346037,ENSP00000363018,ENSP00000413436,ENSP00000416429	RPL10,RPL10A,RPL18A,RPL32,RPLP1
GO:0005681	spliceosomal complex	9	187	0.00035	ENSP00000216832,ENSP00000225792,ENSP00000246194,ENSP00000265866,ENSP00000283179,ENSP00000325376,ENSP00000358635,ENSP00000360532,ENSP00000412566	CDC5L,DDX5,HNRNPH3,HNRNPM,HNRNPU,PNN,RALY,SNRPB,SYNCRIP
GO:0032993	protein-DNA complex	9	188	0.00035	ENSP00000308405,ENSP00000332706,ENSP00000339566,ENSP00000352257,ENSP00000360532,ENSP00000385479,ENSP00000423563,ENSP00000434024,ENSP00000480826	CDC5L,H2AFV,H2AFX,H2AFY,HIST1H1C,HIST1H3A,HIST2H3A,PURA,XRCC6
GO:0042470	melanosome	7	105	0.00037	ENSP00000236671,ENSP00000254722,ENSP00000286091,ENSP00000299427,ENSP00000346762,ENSP00000348461,ENSP00000379350	CTSD,ITGB1,PDIA4,RAC1,SERPINF1,SND1,TPP1
GO:0005576	extracellular region	39	2505	0.00047	ENSP00000207549,ENSP00000217131,ENSP00000222381,ENSP00000226355,ENSP00000228740,ENSP00000232003,ENSP00000236671,ENSP00000247153,ENSP00000254722,ENSP00000261405,ENSP00000262428,ENSP00000262455,ENSP00000263697,ENSP00000264690,ENSP00000267884,ENSP00000286091,ENSP00000291568,ENSP00000292401,ENSP00000310129,ENSP00000331544,ENSP00000342026,ENSP00000345968,ENSP00000352257,ENSP00000355627,ENSP00000357123…	AFM,AGT,AHNAK,ALDOA,AZGP1,CCL5,CFP,COTL1,CSTB,CTSD,CTSZ,DNAJC8,ERP44,FBLN1,GSTP1,HGFAC,HIST1H3A,HIST2H3A,HPR,HRG,ITIH3,KLKB1,LTA4H,LTBP1,MNDA,PDIA4,PGLYRP2,PON1,PRDX6,PSMD2,S100A8,S100A9,SERPINF1,SRP14,TEK,TPT1,UNC13D,VWF,XRCC6
GO:0044433	cytoplasmic vesicle part	27	1447	0.00048	ENSP00000176763,ENSP00000207549,ENSP00000217131,ENSP00000221957,ENSP00000228740,ENSP00000232003,ENSP00000236671,ENSP00000247153,ENSP00000261405,ENSP00000262428,ENSP00000262455,ENSP00000264380,ENSP00000264710,ENSP00000267884,ENSP00000291568,ENSP00000310129,ENSP00000312734,ENSP00000342026,ENSP00000348461,ENSP00000352257,ENSP00000357123,ENSP00000357722,ENSP00000357727,ENSP00000378669,ENSP00000378721…	ALDOA,CFP,COTL1,CSTB,CTSD,CTSZ,ERP44,GSTP1,HRG,ITIH3,LTA4H,MNDA,PIKFYVE,PLIN3,PRDX6,PSMD2,RAB10,RAB8B,RAC1,S100A8,S100A9,SEC31A,SRP14,STK10,UNC13D,VWF,XRCC6
GO:0015934	large ribosomal subunit	6	87	0.001	ENSP00000222247,ENSP00000346037,ENSP00000363018,ENSP00000375730,ENSP00000413436,ENSP00000416429	RPL10,RPL10A,RPL13A,RPL18A,RPL32,RPLP1
GO:0031410	cytoplasmic vesicle	35	2226	0.001	ENSP00000176763,ENSP00000207549,ENSP00000217131,ENSP00000221957,ENSP00000228740,ENSP00000232003,ENSP00000236671,ENSP00000247153,ENSP00000254722,ENSP00000261405,ENSP00000262428,ENSP00000262455,ENSP00000264380,ENSP00000264710,ENSP00000267884,ENSP00000285208,ENSP00000286091,ENSP00000291568,ENSP00000299427,ENSP00000310129,ENSP00000312734,ENSP00000342026,ENSP00000346762,ENSP00000348461,ENSP00000352257…	ALDOA,CFP,COTL1,CSTB,CTSD,CTSZ,ENSG00000103426,ERP44,GSTP1,HRG,ITGB1,ITIH3,LTA4H,MNDA,PDIA4,PIKFYVE,PLIN3,PRDX6,PSMD2,RAB10,RAB6B,RAB8B,RAC1,S100A8,S100A9,SEC31A,SERPINF1,SND1,SRP14,STK10,TPP1,TPT1,UNC13D,VWF,XRCC6
GO:0031982	vesicle	36	2318	0.001	ENSP00000176763,ENSP00000207549,ENSP00000217131,ENSP00000221957,ENSP00000228740,ENSP00000232003,ENSP00000236671,ENSP00000247153,ENSP00000254722,ENSP00000261405,ENSP00000262428,ENSP00000262455,ENSP00000264380,ENSP00000264710,ENSP00000267884,ENSP00000285208,ENSP00000286091,ENSP00000291568,ENSP00000299427,ENSP00000310129,ENSP00000312734,ENSP00000342026,ENSP00000346762,ENSP00000348461,ENSP00000352257…	AHNAK,ALDOA,CFP,COTL1,CSTB,CTSD,CTSZ,ENSG00000103426,ERP44,GSTP1,HRG,ITGB1,ITIH3,LTA4H,MNDA,PDIA4,PIKFYVE,PLIN3,PRDX6,PSMD2,RAB10,RAB6B,RAB8B,RAC1,S100A8,S100A9,SEC31A,SERPINF1,SND1,SRP14,STK10,TPP1,TPT1,UNC13D,VWF,XRCC6
GO:1904724	tertiary granule lumen	5	55	0.0011	ENSP00000228740,ENSP00000236671,ENSP00000247153,ENSP00000291568,ENSP00000378669	ALDOA,CFP,CSTB,CTSD,LTA4H
GO:0000803	sex chromosome	4	29	0.0012	ENSP00000254480,ENSP00000283179,ENSP00000423563,ENSP00000434024	H2AFX,H2AFY,HNRNPU,SMARCC1
GO:0000786	nucleosome	6	106	0.0026	ENSP00000308405,ENSP00000339566,ENSP00000385479,ENSP00000423563,ENSP00000434024,ENSP00000480826	H2AFV,H2AFX,H2AFY,HIST1H1C,HIST1H3A,HIST2H3A
GO:0044421	extracellular region part	23	1375	0.0071	ENSP00000217131,ENSP00000222381,ENSP00000226355,ENSP00000236671,ENSP00000247153,ENSP00000254722,ENSP00000261405,ENSP00000263697,ENSP00000264690,ENSP00000286091,ENSP00000291568,ENSP00000292401,ENSP00000331544,ENSP00000355627,ENSP00000357722,ENSP00000357727,ENSP00000367263,ENSP00000378669,ENSP00000386043,ENSP00000421801,ENSP00000441828,ENSP00000474412,ENSP00000477781	AFM,AGT,AHNAK,ALDOA,AZGP1,CCL5,CFP,CSTB,CTSD,CTSZ,DNAJC8,FBLN1,HGFAC,HPR,KLKB1,LTBP1,PDIA4,PON1,S100A8,S100A9,SERPINF1,TPT1,VWF
GO:0097452	GAIT complex	2	4	0.0079	ENSP00000358635,ENSP00000375730	RPL13A,SYNCRIP
GO:0033093	Weibel-Palade body	2	5	0.0108	ENSP00000207549,ENSP00000261405	UNC13D,VWF
GO:0070937	CRD-mediated mRNA stability complex	2	6	0.014	ENSP00000283179,ENSP00000358635	HNRNPU,SYNCRIP
GO:0071204	histone pre-mRNA 3'end processing complex	2	6	0.014	ENSP00000358635,ENSP00000412566	SNRPB,SYNCRIP
GO:0098556	cytoplasmic side of rough endoplasmic reticulum membrane	2	6	0.014	ENSP00000348849,ENSP00000379339	RPS26,RPS29
GO:0035580	specific granule lumen	4	62	0.0152	ENSP00000217131,ENSP00000236671,ENSP00000247153,ENSP00000262455	CFP,CTSD,CTSZ,ERP44
GO:0043209	myelin sheath	6	157	0.0158	ENSP00000263354,ENSP00000273398,ENSP00000285379,ENSP00000360671,ENSP00000379350,ENSP00000379386	ATP6V1A,CA2,ITGB1,LDHB,NAPA,SLC25A5
GO:0000502	proteasome complex	4	64	0.0164	ENSP00000216802,ENSP00000310129,ENSP00000364016,ENSP00000414359	PSMA1,PSMB8,PSMD2,PSME2
GO:0005615	extracellular space	19	1134	0.0172	ENSP00000217131,ENSP00000222381,ENSP00000226355,ENSP00000236671,ENSP00000247153,ENSP00000264690,ENSP00000286091,ENSP00000291568,ENSP00000292401,ENSP00000331544,ENSP00000355627,ENSP00000357722,ENSP00000357727,ENSP00000367263,ENSP00000378669,ENSP00000421801,ENSP00000441828,ENSP00000474412,ENSP00000477781	AFM,AGT,AHNAK,ALDOA,AZGP1,CCL5,CFP,CSTB,CTSD,CTSZ,FBLN1,HGFAC,HPR,KLKB1,PDIA4,PON1,S100A8,S100A9,TPT1
GO:0070820	tertiary granule	6	164	0.0183	ENSP00000228740,ENSP00000236671,ENSP00000247153,ENSP00000291568,ENSP00000348461,ENSP00000378669	ALDOA,CFP,CSTB,CTSD,LTA4H,RAC1
GO:0034366	spherical high-density lipoprotein particle	2	9	0.0236	ENSP00000222381,ENSP00000441828	HPR,PON1
GO:0070419	nonhomologous end joining complex	2	9	0.0236	ENSP00000352257,ENSP00000360682	C9orf142,XRCC6
GO:0045121	membrane raft	8	300	0.0243	ENSP00000236671,ENSP00000264380,ENSP00000305675,ENSP00000360671,ENSP00000365147,ENSP00000369375,ENSP00000379350,ENSP00000379386	CTSD,EFHD2,ITGB1,LDHB,PIKFYVE,SDPR,SLC25A5,TEK
GO:0048471	perinuclear region of cytoplasm	13	670	0.0243	ENSP00000245185,ENSP00000254657,ENSP00000254722,ENSP00000264380,ENSP00000312734,ENSP00000326381,ENSP00000342026,ENSP00000357709,ENSP00000360532,ENSP00000369757,ENSP00000378721,ENSP00000379350,ENSP00000439012	CDC5L,DBI,EIF4A2,ITGB1,MT2A,PER2,PIKFYVE,PRDX6,RAB8B,RPS6,S100A6,SEC31A,SERPINF1
GO:0036464	cytoplasmic ribonucleoprotein granule	6	191	0.0341	ENSP00000283179,ENSP00000318195,ENSP00000348461,ENSP00000362744,ENSP00000369757,ENSP00000377681	G3BP1,HNRNPU,NCL,RAC1,RPS4X,RPS6
GO:0001741	XY body	2	13	0.0399	ENSP00000254480,ENSP00000434024	H2AFX,SMARCC1
GO:0012505	endomembrane system	49	4347	0.0468	ENSP00000176763,ENSP00000207549,ENSP00000216038,ENSP00000217131,ENSP00000221957,ENSP00000228740,ENSP00000230050,ENSP00000232003,ENSP00000236671,ENSP00000247153,ENSP00000261405,ENSP00000262428,ENSP00000262455,ENSP00000263354,ENSP00000264380,ENSP00000264710,ENSP00000267884,ENSP00000285208,ENSP00000286091,ENSP00000291568,ENSP00000296674,ENSP00000300738,ENSP00000307889,ENSP00000310129,ENSP00000312734…	ALDOA,CFP,COTL1,CSTB,CTSD,CTSZ,DBI,ENSG00000103426,ERP44,GSTP1,HRG,ITGB1,ITIH3,LTA4H,LTBP1,MATR3,MNDA,NAPA,PDIA4,PIKFYVE,PLIN3,PRDX6,PSMD2,RAB10,RAB6B,RAB8B,RAC1,RPL10,RPL13,RPL34,RPS12,RPS23,RPS26,RPS29,RPS3A,RPS6,RRM1,RTCB,S100A6,S100A8,S100A9,SEC31A,SRP14,STK10,SYNCRIP,TPT1,UNC13D,VWF,XRCC6

## Sheet: enrichment.PMID
#term ID	term description	observed gene count	background gene count	false discovery rate	matching proteins in your network (IDs)	matching proteins in your network (labels)
PMID:30857280	(2019) Quercetin Inhibits the Proliferation and Aflatoxins Biosynthesis of Aspergillus flavus.	15	53	2.01e-12	ENSP00000251453,ENSP00000296674,ENSP00000309334,ENSP00000339795,ENSP00000346037,ENSP00000346088,ENSP00000348849,ENSP00000369757,ENSP00000378163,ENSP00000379506,ENSP00000416429,ENSP00000435096,ENSP00000463784,ENSP00000470972,ENSP00000472985	RPL14,RPL15,RPL22,RPL26,RPL32,RPL34,RPL7,RPLP1,RPS16,RPS19,RPS23,RPS25,RPS26,RPS5,RPS6
PMID:30302013	(2018) Porcine Reproductive and Respiratory Syndrome Virus strains with Higher Virulence Cause Marked Protein Profile Changes in MARC-145 Cells.	21	196	9.99e-12	ENSP00000012443,ENSP00000222247,ENSP00000246194,ENSP00000254480,ENSP00000283179,ENSP00000286091,ENSP00000318195,ENSP00000325376,ENSP00000342026,ENSP00000354346,ENSP00000357535,ENSP00000358140,ENSP00000358635,ENSP00000363018,ENSP00000367263,ENSP00000378669,ENSP00000379350,ENSP00000413436,ENSP00000414359,ENSP00000435096,ENSP00000480826	AHNAK,ALDOA,ECHS1,EIF3A,HIST1H3A,HNRNPM,HNRNPU,ITGB1,MATR3,NCL,PDIA4,PPP5C,PRDX6,PSMA1,RALY,RPL10,RPL10A,RPL18A,RPS25,SMARCC1,SYNCRIP
PMID:32059409	(2020) Genome-Wide Identification, Evolution and Expression of the Complete Set of Cytoplasmic Ribosomal Protein Genes in Nile Tilapia.	14	50	1e-11	ENSP00000296674,ENSP00000339795,ENSP00000346037,ENSP00000346088,ENSP00000348849,ENSP00000369757,ENSP00000375730,ENSP00000379339,ENSP00000379506,ENSP00000416429,ENSP00000418868,ENSP00000435096,ENSP00000470972,ENSP00000472985	RPL13A,RPL14,RPL22,RPL29,RPL32,RPL7,RPLP1,RPS19,RPS23,RPS25,RPS26,RPS29,RPS5,RPS6
PMID:20116044	(2010) Ribosomal protein genes RPS10 and RPS26 are commonly mutated in Diamond-Blackfan anemia.	13	41	2.5e-11	ENSP00000296674,ENSP00000309334,ENSP00000346037,ENSP00000348849,ENSP00000361076,ENSP00000363018,ENSP00000369757,ENSP00000378163,ENSP00000379339,ENSP00000416429,ENSP00000418868,ENSP00000435096,ENSP00000470972	RPL10A,RPL15,RPL29,RPL32,RPL34,RPL7A,RPLP1,RPS19,RPS23,RPS25,RPS26,RPS29,RPS6
PMID:16504170	(2006) Characteristics and clustering of human ribosomal protein genes.	13	49	1.42e-10	ENSP00000296674,ENSP00000309334,ENSP00000339795,ENSP00000346037,ENSP00000346050,ENSP00000346088,ENSP00000362744,ENSP00000369757,ENSP00000379339,ENSP00000379506,ENSP00000435096,ENSP00000463784,ENSP00000470972	RPL14,RPL15,RPL22,RPL26,RPL7,RPLP1,RPS19,RPS23,RPS25,RPS29,RPS3A,RPS4X,RPS6
PMID:20819938	(2010) Functional dichotomy of ribosomal proteins during the synthesis of mammalian 40S ribosomal subunits.	12	39	3.24e-10	ENSP00000221801,ENSP00000251453,ENSP00000296674,ENSP00000318195,ENSP00000339095,ENSP00000346050,ENSP00000362744,ENSP00000369757,ENSP00000379339,ENSP00000435096,ENSP00000470972,ENSP00000472985	FBL,NCL,RPS16,RPS19,RPS23,RPS25,RPS29,RPS3A,RPS4X,RPS5,RPS6,RPS7
PMID:22709827	(2012) Alterations in the ribosomal machinery in cancer and hematologic disorders.	12	43	7.47e-10	ENSP00000309334,ENSP00000339795,ENSP00000346050,ENSP00000346088,ENSP00000362744,ENSP00000363574,ENSP00000369757,ENSP00000375730,ENSP00000379339,ENSP00000418868,ENSP00000463784,ENSP00000470972	EIF6,RPL13A,RPL15,RPL22,RPL26,RPL29,RPL7,RPS19,RPS29,RPS3A,RPS4X,RPS6
PMID:25853866	(2015) Identification and fine mapping of nuclear and nucleolar localization signals within the human ribosomal protein S17.	10	20	9.25e-10	ENSP00000221801,ENSP00000251453,ENSP00000346050,ENSP00000346088,ENSP00000361076,ENSP00000369757,ENSP00000375730,ENSP00000418082,ENSP00000435096,ENSP00000470972	FBL,RPL13A,RPL22,RPL37A,RPL7A,RPS16,RPS19,RPS25,RPS3A,RPS6
PMID:31036921	(2019) A combined FSTRA-shotgun proteomics approach to identify molecular changes in zebrafish upon chemical exposure.	10	27	9.08e-09	ENSP00000339795,ENSP00000346050,ENSP00000346088,ENSP00000348849,ENSP00000361076,ENSP00000362744,ENSP00000363018,ENSP00000369757,ENSP00000379506,ENSP00000477781	RPL10A,RPL14,RPL22,RPL7,RPL7A,RPS26,RPS3A,RPS4X,RPS6,TPT1
PMID:31582840	(2019) Stress granules and neurodegeneration.	12	66	4.41e-08	ENSP00000225792,ENSP00000283179,ENSP00000326381,ENSP00000354346,ENSP00000369757,ENSP00000377681,ENSP00000378163,ENSP00000400142,ENSP00000418868,ENSP00000435096,ENSP00000463784,ENSP00000470972	DDX5,EIF4A2,EWSR1,G3BP1,HNRNPU,MATR3,RPL26,RPL29,RPL34,RPS19,RPS25,RPS6
PMID:26892688	(2016) Role of ribosomal protein mutations in tumor development (Review).	11	49	4.74e-08	ENSP00000221801,ENSP00000309334,ENSP00000346050,ENSP00000346088,ENSP00000348849,ENSP00000361076,ENSP00000369757,ENSP00000379339,ENSP00000418868,ENSP00000463784,ENSP00000470972	FBL,RPL15,RPL22,RPL26,RPL29,RPL7A,RPS19,RPS26,RPS29,RPS3A,RPS6
PMID:26853850	(2015) Regulatory Roles of Rpl22 in Hematopoiesis: An Old Dog with New Tricks.	11	56	1.55e-07	ENSP00000309334,ENSP00000318195,ENSP00000346088,ENSP00000348849,ENSP00000358635,ENSP00000369757,ENSP00000375730,ENSP00000379339,ENSP00000435096,ENSP00000463784,ENSP00000470972	NCL,RPL13A,RPL15,RPL22,RPL26,RPS19,RPS25,RPS26,RPS29,RPS6,SYNCRIP
PMID:27908926	(2016) The Evolution of the Ribosomal Protein-MDM2-p53 Pathway.	11	58	2.01e-07	ENSP00000309334,ENSP00000339795,ENSP00000346050,ENSP00000346088,ENSP00000369757,ENSP00000375730,ENSP00000416429,ENSP00000418868,ENSP00000435096,ENSP00000463784,ENSP00000470972	RPL13A,RPL15,RPL22,RPL26,RPL29,RPL32,RPL7,RPS19,RPS25,RPS3A,RPS6
PMID:26839715	(2016) Dysfunction in Ribosomal Gene Expression in the Hypothalamus and Hippocampus following Chronic Social Defeat Stress in Male Mice as Revealed by RNA-Seq.	10	48	7.57e-07	ENSP00000251453,ENSP00000339795,ENSP00000346037,ENSP00000362744,ENSP00000363018,ENSP00000378163,ENSP00000418082,ENSP00000418868,ENSP00000470972,ENSP00000472985	RPL10A,RPL29,RPL34,RPL37A,RPL7,RPLP1,RPS16,RPS19,RPS4X,RPS5
PMID:25698879	(2015) Identification and Expression Analysis of Ribosome Biogenesis Factor Co-orthologs in Solanum lycopersicum.	10	50	1.01e-06	ENSP00000221801,ENSP00000222247,ENSP00000296674,ENSP00000318195,ENSP00000346050,ENSP00000348849,ENSP00000361076,ENSP00000363574,ENSP00000375730,ENSP00000463784	EIF6,FBL,NCL,RPL13A,RPL18A,RPL26,RPL7A,RPS23,RPS26,RPS3A
PMID:30459641	(2018) Selection of Reference Genes for the Normalization of RT-qPCR Data in Gene Expression Studies in Insects: A Systematic Review.	10	51	1.12e-06	ENSP00000296674,ENSP00000309334,ENSP00000339795,ENSP00000346088,ENSP00000348849,ENSP00000369757,ENSP00000379506,ENSP00000418868,ENSP00000463784,ENSP00000472985	RPL14,RPL15,RPL22,RPL26,RPL29,RPL7,RPS23,RPS26,RPS5,RPS6
PMID:32098201	(2020) Ribosome and Translational Control in Stem Cells.	12	94	1.12e-06	ENSP00000221801,ENSP00000296674,ENSP00000318195,ENSP00000326381,ENSP00000346088,ENSP00000348849,ENSP00000363018,ENSP00000369757,ENSP00000379506,ENSP00000435096,ENSP00000470972,ENSP00000472985	EIF4A2,FBL,NCL,RPL10A,RPL14,RPL22,RPS19,RPS23,RPS25,RPS26,RPS5,RPS6
PMID:31350888	(2019) Hallmarks of ribosomopathies.	11	72	1.16e-06	ENSP00000221801,ENSP00000309334,ENSP00000346088,ENSP00000348849,ENSP00000363574,ENSP00000364016,ENSP00000378669,ENSP00000379339,ENSP00000446252,ENSP00000463784,ENSP00000470972	ALDOA,EIF6,FBL,PSMB8,RPL15,RPL22,RPL26,RPS19,RPS26,RPS29,SOD2
PMID:19287375	(2009) Absence of nucleolar disruption after impairment of 40S ribosome biogenesis reveals an rpL11-translation-dependent mechanism of p53 induction.	8	23	1.72e-06	ENSP00000251453,ENSP00000296674,ENSP00000318195,ENSP00000346050,ENSP00000361076,ENSP00000369757,ENSP00000463784,ENSP00000470972	NCL,RPL26,RPL7A,RPS16,RPS19,RPS23,RPS3A,RPS6
PMID:15707503	(2005) The architecture of mammalian ribosomal protein promoters.	8	25	2.84e-06	ENSP00000251453,ENSP00000339795,ENSP00000369757,ENSP00000375730,ENSP00000376056,ENSP00000416429,ENSP00000418868,ENSP00000477781	EEF1B2,RPL13A,RPL29,RPL32,RPL7,RPS16,RPS6,TPT1
PMID:18697920	(2008) The role of human ribosomal proteins in the maturation of rRNA and ribosome production.	7	14	3.17e-06	ENSP00000251453,ENSP00000339795,ENSP00000369757,ENSP00000379506,ENSP00000435096,ENSP00000463784,ENSP00000470972	RPL14,RPL26,RPL7,RPS16,RPS19,RPS25,RPS6
PMID:26485547	(2015) Reduced protein synthesis in schizophrenia patient-derived olfactory cells.	9	41	3.19e-06	ENSP00000222247,ENSP00000346037,ENSP00000362744,ENSP00000363018,ENSP00000369757,ENSP00000375730,ENSP00000379350,ENSP00000379506,ENSP00000416429	ITGB1,RPL10A,RPL13A,RPL14,RPL18A,RPL32,RPLP1,RPS4X,RPS6
PMID:11922865	(2002) Nerve growth factor selectively regulates expression of transcripts encoding ribosomal proteins.	8	27	4.13e-06	ENSP00000222247,ENSP00000339795,ENSP00000346050,ENSP00000361076,ENSP00000375730,ENSP00000379339,ENSP00000418082,ENSP00000470972	RPL13A,RPL18A,RPL37A,RPL7,RPL7A,RPS19,RPS29,RPS3A
PMID:30922378	(2019) Ribosomalnucleolar stress induction regulates tert-Butyl hydroperoxide (tBHP) mediated oxidative stress in Anopheles gambiae midguts.	7	16	5.77e-06	ENSP00000339795,ENSP00000346050,ENSP00000346088,ENSP00000348849,ENSP00000363018,ENSP00000375730,ENSP00000416429	RPL10A,RPL13A,RPL22,RPL32,RPL7,RPS26,RPS3A
PMID:23382688	(2013) Mutation of the diamond-blackfan anemia gene Rps7 in mouse results in morphological and neuroanatomical phenotypes.	8	29	6.14e-06	ENSP00000346050,ENSP00000346088,ENSP00000348849,ENSP00000369757,ENSP00000379339,ENSP00000418868,ENSP00000463784,ENSP00000470972	RPL22,RPL26,RPL29,RPS19,RPS26,RPS29,RPS3A,RPS6
PMID:27104978	(2016) Rbfox Proteins Regulate Splicing as Part of a Large Multiprotein Complex LASR.	8	30	7.43e-06	ENSP00000225792,ENSP00000246194,ENSP00000283179,ENSP00000325376,ENSP00000346050,ENSP00000354346,ENSP00000358635,ENSP00000380033	DDX17,DDX5,HNRNPM,HNRNPU,MATR3,RALY,RPS3A,SYNCRIP
PMID:28882678	(2018) RNA interference-mediated knockdown of SIRT1 andor SIRT2 in melanoma: Identification of downstream targets by large-scale proteomics analysis.	8	31	8.94e-06	ENSP00000246069,ENSP00000339795,ENSP00000342026,ENSP00000346050,ENSP00000367263,ENSP00000381607,ENSP00000435096,ENSP00000472985	AHNAK,DSTN,GSTP1,PRDX6,RPL7,RPS25,RPS3A,RPS5
PMID:23459595	(2013) The Arabidopsis Cytosolic Ribosomal Proteome: From form to Function.	7	19	1.3e-05	ENSP00000222247,ENSP00000346050,ENSP00000361076,ENSP00000363018,ENSP00000363574,ENSP00000375730,ENSP00000418082	EIF6,RPL10A,RPL13A,RPL18A,RPL37A,RPL7A,RPS3A
PMID:23749060	(2013) Mapping the LINE1 ORF1 protein interactome reveals associated inhibitors of human retrotransposition.	10	72	1.3e-05	ENSP00000216038,ENSP00000221801,ENSP00000225792,ENSP00000267884,ENSP00000283179,ENSP00000301522,ENSP00000318195,ENSP00000352438,ENSP00000358635,ENSP00000380033	DDX17,DDX5,FBL,HNRNPU,NCL,PCBP2,PRDX2,RTCB,SRP14,SYNCRIP
PMID:24225185	(2013) Expression changes of ribosomal proteins in phosphate- and iron-deficient Arabidopsis roots predict stress-specific alterations in ribosome composition.	6	9	1.3e-05	ENSP00000346050,ENSP00000361076,ENSP00000363018,ENSP00000363574,ENSP00000375730,ENSP00000418082	EIF6,RPL10A,RPL13A,RPL37A,RPL7A,RPS3A
PMID:17927810	(2007) The ribosomal protein genes and Minute loci of Drosophila melanogaster.	8	34	1.46e-05	ENSP00000222247,ENSP00000309334,ENSP00000346037,ENSP00000346088,ENSP00000369757,ENSP00000418868,ENSP00000470972,ENSP00000472985	RPL15,RPL18A,RPL22,RPL29,RPLP1,RPS19,RPS5,RPS6
PMID:19097187	(2009) Many ribosomal protein mutations are associated with growth impairment and tumor predisposition in zebrafish.	8	34	1.46e-05	ENSP00000339795,ENSP00000346037,ENSP00000346050,ENSP00000369757,ENSP00000379339,ENSP00000379506,ENSP00000470972,ENSP00000472985	RPL14,RPL7,RPLP1,RPS19,RPS29,RPS3A,RPS5,RPS6
PMID:27253413	(2016) A ribosome-related signature in peripheral blood CLL B cells is linked to reduced survival following treatment.	8	34	1.46e-05	ENSP00000221801,ENSP00000251453,ENSP00000296674,ENSP00000309334,ENSP00000318195,ENSP00000346088,ENSP00000361076,ENSP00000369757	FBL,NCL,RPL15,RPL22,RPL7A,RPS16,RPS23,RPS6
PMID:29438997	(2018) Doxorubicin-induced DNA Damage Causes Extensive Ubiquitination of Ribosomal Proteins Associated with a Decrease in Protein Translation.	8	35	1.63e-05	ENSP00000301522,ENSP00000310842,ENSP00000318195,ENSP00000348849,ENSP00000349508,ENSP00000369757,ENSP00000434024,ENSP00000463784	CHD4,FANCI,H2AFX,NCL,PRDX2,RPL26,RPS26,RPS6
PMID:30473427	(2019) Ribosome Stoichiometry: From Form to Function.	6	10	1.74e-05	ENSP00000348849,ENSP00000363018,ENSP00000369757,ENSP00000375730,ENSP00000435096,ENSP00000470972	RPL10A,RPL13A,RPS19,RPS25,RPS26,RPS6
PMID:27192978	(2016) Protein expression changes induced in a malignant melanoma cell line by the curcumin analogue compound D6.	7	21	1.8e-05	ENSP00000246194,ENSP00000286091,ENSP00000325376,ENSP00000358635,ENSP00000380033,ENSP00000434024,ENSP00000463784	DDX17,H2AFX,HNRNPM,PDIA4,RALY,RPL26,SYNCRIP
PMID:31523176	(2019) Ribosomal Protein L15 is involved in Colon Carcinogenesis.	7	21	1.8e-05	ENSP00000221801,ENSP00000309334,ENSP00000318195,ENSP00000369757,ENSP00000379339,ENSP00000434024,ENSP00000470972	FBL,H2AFX,NCL,RPL15,RPS19,RPS29,RPS6
PMID:23012496	(2012) The core mouse response to infection by neospora caninum defined by gene set enrichment analyses.	10	78	1.96e-05	ENSP00000309334,ENSP00000339795,ENSP00000346050,ENSP00000346088,ENSP00000362744,ENSP00000363018,ENSP00000376056,ENSP00000416429,ENSP00000435096,ENSP00000472985	EEF1B2,RPL10A,RPL15,RPL22,RPL32,RPL7,RPS25,RPS3A,RPS4X,RPS5
PMID:28505386	(2017) CD-box snoRNAs form methylating and non-methylating ribonucleoprotein complexes: Old dogs show new tricks.	9	56	2.07e-05	ENSP00000221801,ENSP00000225792,ENSP00000318195,ENSP00000332706,ENSP00000354346,ENSP00000358635,ENSP00000362820,ENSP00000375730,ENSP00000472985	DDX5,FBL,MATR3,NCL,PURA,RPL13A,RPS5,SRSF3,SYNCRIP
PMID:28923911	(2017) How Ribosomes Translate Cancer.	9	56	2.07e-05	ENSP00000221801,ENSP00000309334,ENSP00000326381,ENSP00000346088,ENSP00000348849,ENSP00000363574,ENSP00000379339,ENSP00000463784,ENSP00000470972	EIF4A2,EIF6,FBL,RPL15,RPL22,RPL26,RPS19,RPS26,RPS29
PMID:30573510	(2019) Peering through zebrafish to understand inherited bone marrow failure syndromes.	10	79	2.07e-05	ENSP00000309334,ENSP00000310842,ENSP00000346037,ENSP00000348849,ENSP00000363574,ENSP00000379339,ENSP00000379506,ENSP00000434024,ENSP00000463784,ENSP00000470972	EIF6,FANCI,H2AFX,RPL14,RPL15,RPL26,RPLP1,RPS19,RPS26,RPS29
PMID:20410138	(2010) O-GlcNAc cycling enzymes associate with the translational machinery and modify core ribosomal proteins.	7	23	2.61e-05	ENSP00000221801,ENSP00000361076,ENSP00000369757,ENSP00000375730,ENSP00000416429,ENSP00000418868,ENSP00000463784	FBL,RPL13A,RPL26,RPL29,RPL32,RPL7A,RPS6
PMID:30791615	(2019) IRES Trans-Acting Factors, Key Actors of the Stress Response.	10	82	2.69e-05	ENSP00000221801,ENSP00000318195,ENSP00000325376,ENSP00000326381,ENSP00000352438,ENSP00000358635,ENSP00000363018,ENSP00000377681,ENSP00000435096,ENSP00000463784	EIF4A2,FBL,G3BP1,HNRNPM,NCL,PCBP2,RPL10A,RPL26,RPS25,SYNCRIP
PMID:27625393	(2016) Identifying proteins that bind to specific RNAs - focus on simple repeat expansion diseases.	9	60	3.17e-05	ENSP00000225792,ENSP00000283179,ENSP00000318195,ENSP00000332706,ENSP00000339795,ENSP00000352438,ENSP00000362820,ENSP00000380033,ENSP00000400142	DDX17,DDX5,EWSR1,HNRNPU,NCL,PCBP2,PURA,RPL7,SRSF3
PMID:29921292	(2018) Exploring the key genes and pathways of side population cells in human osteosarcoma using gene expression array analysis.	9	60	3.17e-05	ENSP00000222247,ENSP00000225792,ENSP00000346050,ENSP00000357722,ENSP00000357727,ENSP00000362820,ENSP00000378163,ENSP00000379339,ENSP00000416429	DDX5,RPL18A,RPL32,RPL34,RPS29,RPS3A,S100A8,S100A9,SRSF3
PMID:28878028	(2017) Basal-A Triple-Negative Breast Cancer Cells Selectively Rely on RNA Splicing for Survival.	9	61	3.45e-05	ENSP00000310129,ENSP00000326381,ENSP00000339095,ENSP00000346050,ENSP00000369757,ENSP00000379339,ENSP00000412566,ENSP00000414359,ENSP00000472985	EIF4A2,PSMA1,PSMD2,RPS29,RPS3A,RPS5,RPS6,RPS7,SNRPB
PMID:20011513	(2009) rRNA maturation in yeast cells depleted of large ribosomal subunit proteins.	8	41	3.52e-05	ENSP00000339795,ENSP00000346037,ENSP00000346088,ENSP00000378163,ENSP00000379506,ENSP00000416429,ENSP00000418868,ENSP00000463784	RPL14,RPL22,RPL26,RPL29,RPL32,RPL34,RPL7,RPLP1
PMID:31877708	(2019) Advancing the Role of Gamma-Tocotrienol as Proteasomes Inhibitor: A Quantitative Proteomic Analysis of MDA-MB-231 Human Breast Cancer Cells.	10	86	3.67e-05	ENSP00000168216,ENSP00000216802,ENSP00000309334,ENSP00000310129,ENSP00000339795,ENSP00000352257,ENSP00000352438,ENSP00000357535,ENSP00000358635,ENSP00000414359	ECHS1,HSD17B10,PCBP2,PSMA1,PSMD2,PSME2,RPL15,RPL7,SYNCRIP,XRCC6
PMID:32085439	(2020) Personalized Assessment of Normal Tissue Radiosensitivity via Transcriptome Response to Photon, Proton and Carbon Irradiation in Patient-Derived Human Intestinal Organoids.	15	257	3.86e-05	ENSP00000309334,ENSP00000346050,ENSP00000346088,ENSP00000361076,ENSP00000362744,ENSP00000363018,ENSP00000364016,ENSP00000376056,ENSP00000378163,ENSP00000378721,ENSP00000400142,ENSP00000414359,ENSP00000418868,ENSP00000435096,ENSP00000472985	EEF1B2,EWSR1,PSMA1,PSMB8,RPL10A,RPL15,RPL22,RPL29,RPL34,RPL7A,RPS25,RPS3A,RPS4X,RPS5,SEC31A
PMID:17376718	(2007) Cells depleted for RPS19, a protein associated with Diamond Blackfan Anemia, show defects in 18S ribosomal RNA synthesis and small ribosomal subunit production.	5	5	5.03e-05	ENSP00000251453,ENSP00000339795,ENSP00000369757,ENSP00000463784,ENSP00000470972	RPL26,RPL7,RPS16,RPS19,RPS6
PMID:22192797	(2011) Proteomic analysis of endothelial cold-adaptation.	11	118	5.03e-05	ENSP00000228825,ENSP00000246069,ENSP00000270776,ENSP00000283179,ENSP00000286091,ENSP00000300738,ENSP00000308405,ENSP00000352438,ENSP00000365950,ENSP00000377681,ENSP00000378669	ALDOA,ARPC3,DSTN,G3BP1,H2AFV,HNRNPU,PCBP2,PDIA4,PGD,RBM3,RRM1
PMID:28452939	(2017) A Review: Proteomics in Retinal Artery Occlusion, Retinal Vein Occlusion, Diabetic Retinopathy and Acquired Macular Disorders.	11	120	5.69e-05	ENSP00000236671,ENSP00000261405,ENSP00000292401,ENSP00000301522,ENSP00000342026,ENSP00000355627,ENSP00000357727,ENSP00000367263,ENSP00000379350,ENSP00000421801,ENSP00000472985	AGT,AHNAK,AZGP1,CTSD,HGFAC,ITGB1,PRDX2,PRDX6,RPS5,S100A9,VWF
PMID:23462953	(2013) Active regulator of SIRT1 is required for ribosome biogenesis and function.	7	28	6.61e-05	ENSP00000221801,ENSP00000296674,ENSP00000318195,ENSP00000346050,ENSP00000363574,ENSP00000369757,ENSP00000470972	EIF6,FBL,NCL,RPS19,RPS23,RPS3A,RPS6
PMID:28746396	(2017) Recovery of metallo-tolerant and antibiotic resistant psychrophilic bacteria from Siachen glacier, Pakistan.	6	15	7.37e-05	ENSP00000251453,ENSP00000296674,ENSP00000348849,ENSP00000379339,ENSP00000435096,ENSP00000470972	RPS16,RPS19,RPS23,RPS25,RPS26,RPS29
PMID:26091344	(2015) RNA Regulation by Poly(ADP-Ribose) Polymerases.	8	47	7.79e-05	ENSP00000221801,ENSP00000222247,ENSP00000283179,ENSP00000318195,ENSP00000326381,ENSP00000346050,ENSP00000377681,ENSP00000380033	DDX17,EIF4A2,FBL,G3BP1,HNRNPU,NCL,RPL18A,RPS3A
PMID:20707412	(2010) Quantitative proteomics reveals a 'poised quiescence' cellular state after triggering the DNA replication origin activation checkpoint.	11	125	7.83e-05	ENSP00000225792,ENSP00000236671,ENSP00000246194,ENSP00000263697,ENSP00000265866,ENSP00000273398,ENSP00000305675,ENSP00000339566,ENSP00000365950,ENSP00000369757,ENSP00000402103	ATP6V1A,CTSD,DDX5,DNAJC8,HIST1H1C,HK1,HNRNPH3,RALY,RBM3,RPS6,SDPR
PMID:28673543	(2017) Autogenous Control of 5'TOP mRNA Stability by 40S Ribosomes.	7	30	9.28e-05	ENSP00000296674,ENSP00000318195,ENSP00000346050,ENSP00000361076,ENSP00000369757,ENSP00000416429,ENSP00000470972	NCL,RPL32,RPL7A,RPS19,RPS23,RPS3A,RPS6
PMID:24991888	(2014) Stepwise splitting of ribosomal proteins from yeast ribosomes by LiCl.	7	31	0.00011	ENSP00000309334,ENSP00000339795,ENSP00000346037,ENSP00000346088,ENSP00000348849,ENSP00000418868,ENSP00000463784	RPL15,RPL22,RPL26,RPL29,RPL7,RPLP1,RPS26
PMID:20150968	(2010) Insights into the biology of IRES elements through riboproteomic approaches.	8	51	0.00012	ENSP00000283179,ENSP00000300738,ENSP00000318195,ENSP00000326381,ENSP00000352438,ENSP00000358635,ENSP00000362820,ENSP00000377681	EIF4A2,G3BP1,HNRNPU,NCL,PCBP2,RRM1,SRSF3,SYNCRIP
PMID:26565899	(2015) Differential Stoichiometry among Core Ribosomal Proteins.	6	17	0.00012	ENSP00000362744,ENSP00000379339,ENSP00000416429,ENSP00000418082,ENSP00000470972,ENSP00000472985	RPL32,RPL37A,RPS19,RPS29,RPS4X,RPS5
PMID:31949199	(2020) Landscape of transcriptome variations uncovering known and novel driver events in colorectal carcinoma.	10	101	0.00012	ENSP00000283179,ENSP00000292401,ENSP00000346088,ENSP00000362744,ENSP00000363018,ENSP00000367263,ENSP00000379350,ENSP00000379506,ENSP00000418082,ENSP00000472985	AHNAK,AZGP1,HNRNPU,ITGB1,RPL10A,RPL14,RPL22,RPL37A,RPS4X,RPS5
PMID:25482194	(2014) Nucleolar stress with and without p53.	10	102	0.00013	ENSP00000221801,ENSP00000225792,ENSP00000251453,ENSP00000296674,ENSP00000348849,ENSP00000363574,ENSP00000369757,ENSP00000378163,ENSP00000463784,ENSP00000470972	DDX5,EIF6,FBL,RPL26,RPL34,RPS16,RPS19,RPS23,RPS26,RPS6
PMID:28741571	(2016) RP-MDM2-p53 Pathway: Linking Ribosomal Biogenesis and Tumor Surveillance.	7	32	0.00013	ENSP00000346088,ENSP00000348849,ENSP00000369757,ENSP00000418868,ENSP00000435096,ENSP00000463784,ENSP00000470972	RPL22,RPL26,RPL29,RPS19,RPS25,RPS26,RPS6
PMID:21102526	(2011) Ribosomal protein S6 is highly expressed in non-Hodgkin lymphoma and associates with mRNA containing a 5' terminal oligopyrimidine tract.	7	33	0.00015	ENSP00000251453,ENSP00000339795,ENSP00000369757,ENSP00000375730,ENSP00000379339,ENSP00000463784,ENSP00000470972	RPL13A,RPL26,RPL7,RPS16,RPS19,RPS29,RPS6
PMID:26196861	(2015) Functional Classification of Uncultured 'Candidatus Caldiarchaeum subterraneum' Using the Maple System.	7	33	0.00015	ENSP00000309334,ENSP00000339095,ENSP00000346088,ENSP00000363574,ENSP00000379506,ENSP00000470972,ENSP00000472985	EIF6,RPL14,RPL15,RPL22,RPS19,RPS5,RPS7
PMID:30881276	(2019) Diamond Blackfan Anemia: Genetics, Pathogenesis, Diagnosis and Treatment.	7	33	0.00015	ENSP00000339795,ENSP00000348849,ENSP00000379339,ENSP00000379506,ENSP00000463784,ENSP00000470972,ENSP00000472985	RPL14,RPL26,RPL7,RPS19,RPS26,RPS29,RPS5
PMID:31925425	(2020) Identification and Evaluation of Reference Genes for Normalization of Gene Expression in Developmental Stages, Sexes, and Tissues of Diaphania caesalis (Lepidoptera, Pyralidae).	6	18	0.00015	ENSP00000307889,ENSP00000326381,ENSP00000346050,ENSP00000361076,ENSP00000375730,ENSP00000416429	EIF4A2,RPL13,RPL13A,RPL32,RPL7A,RPS3A
PMID:12162807	(2002) Complete nucleotide sequence of the S10-spc operon of phytoplasma: gene organization and genetic code resemble those of Bacillus subtilis.	6	19	0.00018	ENSP00000309334,ENSP00000346088,ENSP00000379506,ENSP00000418868,ENSP00000470972,ENSP00000472985	RPL14,RPL15,RPL22,RPL29,RPS19,RPS5
PMID:20221446	(2010) Silencing of ribosomal protein S9 elicits a multitude of cellular responses inhibiting the growth of cancer cells subsequent to p53 activation.	7	35	0.00018	ENSP00000221801,ENSP00000318195,ENSP00000346088,ENSP00000369757,ENSP00000418868,ENSP00000463784,ENSP00000470972	FBL,NCL,RPL22,RPL26,RPL29,RPS19,RPS6
PMID:21067278	(2011) Effect of carbon nanoparticles on renal epithelial cell structure, barrier function, and protein expression.	8	55	0.00018	ENSP00000168216,ENSP00000283179,ENSP00000290299,ENSP00000378669,ENSP00000402103,ENSP00000434024,ENSP00000472985,ENSP00000474412	ALDOA,ATP5O,CCL5,H2AFX,HK1,HNRNPU,HSD17B10,RPS5
PMID:22046323	(2011) Paromomycin affects translation and vesicle-mediated trafficking as revealed by proteomics of paromomycin -susceptible -resistant Leishmania donovani.	6	19	0.00018	ENSP00000221801,ENSP00000222247,ENSP00000270776,ENSP00000348849,ENSP00000369757,ENSP00000402103	FBL,HK1,PGD,RPL18A,RPS26,RPS6
PMID:25424902	(2015) Loss of function mutations in RPL27 and RPS27 identified by whole-exome sequencing in Diamond-Blackfan anaemia.	6	19	0.00018	ENSP00000222247,ENSP00000348849,ENSP00000379339,ENSP00000379506,ENSP00000463784,ENSP00000470972	RPL14,RPL18A,RPL26,RPS19,RPS26,RPS29
PMID:26816005	(2016) Homologous Transcription Factors DUX4 and DUX4c Associate with Cytoplasmic Proteins during Muscle Differentiation.	9	79	0.00018	ENSP00000225792,ENSP00000283179,ENSP00000318195,ENSP00000346050,ENSP00000352438,ENSP00000358635,ENSP00000362820,ENSP00000365950,ENSP00000380033	DDX17,DDX5,HNRNPU,NCL,PCBP2,RBM3,RPS3A,SRSF3,SYNCRIP
PMID:27165002	(2016) The sub-nucleolar localization of PHF6 defines its role in rDNA transcription and early processing events.	6	19	0.00018	ENSP00000221801,ENSP00000264010,ENSP00000318195,ENSP00000346050,ENSP00000346088,ENSP00000349508	CHD4,CTCF,FBL,NCL,RPL22,RPS3A
PMID:24512814	(2014) Protein signatures of oxidative stress response in a patient specific cell line model for autism.	7	36	0.00021	ENSP00000216802,ENSP00000221418,ENSP00000273398,ENSP00000301522,ENSP00000357535,ENSP00000414359,ENSP00000472985	ATP6V1A,ECH1,ECHS1,PRDX2,PSMA1,PSME2,RPS5
PMID:19765279	(2009) Fibroblasts from patients with Diamond-Blackfan anaemia show abnormal expression of genes involved in protein synthesis, amino acid metabolism and cancer.	8	58	0.00025	ENSP00000222247,ENSP00000309334,ENSP00000346088,ENSP00000378163,ENSP00000379506,ENSP00000418868,ENSP00000446252,ENSP00000470972	RPL14,RPL15,RPL18A,RPL22,RPL29,RPL34,RPS19,SOD2
PMID:28625553	(2017) Heterogeneous Ribosomes Preferentially Translate Distinct Subpools of mRNAs Genome-wide.	6	21	0.00027	ENSP00000346050,ENSP00000348849,ENSP00000361076,ENSP00000363018,ENSP00000418868,ENSP00000435096	RPL10A,RPL29,RPL7A,RPS25,RPS26,RPS3A
PMID:30105457	(2018) The nucleolus, an ally, and an enemy of cancer cells.	8	59	0.00027	ENSP00000221801,ENSP00000251453,ENSP00000318195,ENSP00000342026,ENSP00000369757,ENSP00000378163,ENSP00000463784,ENSP00000470972	FBL,NCL,PRDX6,RPL26,RPL34,RPS16,RPS19,RPS6
PMID:21846828	(2011) Host- and strain-specific regulation of influenza virus polymerase activity by interacting cellular proteins.	7	38	0.00028	ENSP00000225792,ENSP00000283179,ENSP00000325376,ENSP00000326381,ENSP00000352257,ENSP00000380033,ENSP00000472985	DDX17,DDX5,EIF4A2,HNRNPM,HNRNPU,RPS5,XRCC6
PMID:22909348	(2012) Comprehensive proteomic analysis of nonintegrin laminin receptor interacting proteins.	7	38	0.00028	ENSP00000251453,ENSP00000254480,ENSP00000275603,ENSP00000296674,ENSP00000364893,ENSP00000379339,ENSP00000435096	ARHGEF7,CCT6A,RPS16,RPS23,RPS25,RPS29,SMARCC1
PMID:29036638	(2017) The basic tilted helix bundle domain of the prolyl isomerase FKBP25 is a novel double-stranded RNA binding module.	7	38	0.00028	ENSP00000296674,ENSP00000300738,ENSP00000309334,ENSP00000318195,ENSP00000346050,ENSP00000352257,ENSP00000369757	NCL,RPL15,RPS23,RPS3A,RPS6,RRM1,XRCC6
PMID:31040842	(2019) IFIT5 Participates in the Antiviral Mechanisms of Rainbow Trout Red Blood Cells.	7	38	0.00028	ENSP00000251453,ENSP00000292401,ENSP00000309334,ENSP00000339795,ENSP00000348849,ENSP00000357727,ENSP00000362744	AZGP1,RPL15,RPL7,RPS16,RPS26,RPS4X,S100A9
PMID:25075203	(2014) Colorectal cancer derived organotypic spheroids maintain essential tissue characteristics but adapt their metabolism in culture.	9	86	0.00029	ENSP00000352257,ENSP00000354346,ENSP00000362820,ENSP00000367263,ENSP00000376056,ENSP00000379350,ENSP00000380033,ENSP00000381607,ENSP00000446252	AHNAK,DDX17,EEF1B2,GSTP1,ITGB1,MATR3,SOD2,SRSF3,XRCC6
PMID:19138403	(2009) RPS2: a novel therapeutic target in prostate cancer.	6	22	0.00031	ENSP00000251453,ENSP00000346050,ENSP00000361076,ENSP00000369757,ENSP00000413436,ENSP00000416429	RPL10,RPL32,RPL7A,RPS16,RPS3A,RPS6
PMID:23990801	(2013) The ribosomal protein Rpl22 controls ribosome composition by directly repressing expression of its own paralog, Rpl22l1.	6	22	0.00031	ENSP00000339795,ENSP00000346088,ENSP00000369757,ENSP00000375730,ENSP00000418868,ENSP00000470972	RPL13A,RPL22,RPL29,RPL7,RPS19,RPS6
PMID:24771345	(2014) Identification and characterization of RNA guanine-quadruplex binding proteins.	7	39	0.00031	ENSP00000283179,ENSP00000318195,ENSP00000339795,ENSP00000365147,ENSP00000369757,ENSP00000379506,ENSP00000463784	EFHD2,HNRNPU,NCL,RPL14,RPL26,RPL7,RPS6
PMID:25144937	(2014) Ribosomal protein S27-like is a physiological regulator of p53 that suppresses genomic instability and tumorigenesis.	8	61	0.00031	ENSP00000275428,ENSP00000346088,ENSP00000348849,ENSP00000357722,ENSP00000369757,ENSP00000435096,ENSP00000463784,ENSP00000470972	GGCT,RPL22,RPL26,RPS19,RPS25,RPS26,RPS6,S100A8
PMID:25385494	(2015) Bmi1 promotes erythroid development through regulating ribosome biogenesis.	7	39	0.00031	ENSP00000339795,ENSP00000346088,ENSP00000348849,ENSP00000379339,ENSP00000418868,ENSP00000470972,ENSP00000472985	RPL22,RPL29,RPL7,RPS19,RPS26,RPS29,RPS5
PMID:30247708	(2018) Comprehensive analysis of the BC200 ribonucleoprotein reveals a reciprocal regulatory function with CSDE1UNR.	7	39	0.00031	ENSP00000225792,ENSP00000267884,ENSP00000318195,ENSP00000326381,ENSP00000346050,ENSP00000352438,ENSP00000358635	DDX5,EIF4A2,NCL,PCBP2,RPS3A,SRP14,SYNCRIP
PMID:19889237	(2009) Comparative proteomic analysis of malformed umbilical cords from somatic cell nuclear transfer-derived piglets: implications for early postnatal death.	7	40	0.00034	ENSP00000246069,ENSP00000261405,ENSP00000301522,ENSP00000306362,ENSP00000308753,ENSP00000369375,ENSP00000379386	DSTN,LDHB,PRDX2,TBCA,TEK,TMOD3,VWF
PMID:26455956	(2016) Linker histone H1 and protein-protein interactions.	8	63	0.00036	ENSP00000318195,ENSP00000332706,ENSP00000339566,ENSP00000346050,ENSP00000346088,ENSP00000352257,ENSP00000361076,ENSP00000375730	HIST1H1C,NCL,PURA,RPL13A,RPL22,RPL7A,RPS3A,XRCC6
PMID:27165399	(2016) The cis-acting replication element of the Hepatitis C virus genome recruits host factors that influence viral replication and translation.	6	23	0.00036	ENSP00000225792,ENSP00000325376,ENSP00000352257,ENSP00000365950,ENSP00000377681,ENSP00000380033	DDX17,DDX5,G3BP1,HNRNPM,RBM3,XRCC6
PMID:25379041	(2014) Phenotypic and proteomic characteristics of human dental pulp derived mesenchymal stem cells from a natal, an exfoliated deciduous, and an impacted third molar tooth.	7	41	0.00038	ENSP00000262428,ENSP00000301522,ENSP00000306362,ENSP00000357709,ENSP00000379350,ENSP00000381607,ENSP00000446252	COTL1,GSTP1,ITGB1,PRDX2,S100A6,SOD2,TBCA
PMID:23321784	(2013) Adaptive changes in the neuronal proteome: mitochondrial energy production, endoplasmic reticulum stress, and ribosomal dysfunction in the cellular response to metabolic stress.	7	42	0.00043	ENSP00000168216,ENSP00000221418,ENSP00000262455,ENSP00000286091,ENSP00000296674,ENSP00000301522,ENSP00000310129	ECH1,ERP44,HSD17B10,PDIA4,PRDX2,PSMD2,RPS23
PMID:23671674	(2013) A microarray-based gene expression analysis to identify diagnostic biomarkers for unknown primary cancer.	7	42	0.00043	ENSP00000222247,ENSP00000285379,ENSP00000348849,ENSP00000357709,ENSP00000375730,ENSP00000381607,ENSP00000418868	CA2,GSTP1,RPL13A,RPL18A,RPL29,RPS26,S100A6
PMID:26104898	(2015) [Research Progress of Biomakers Proteomics-based in Lung Cancer].	7	42	0.00043	ENSP00000236671,ENSP00000254722,ENSP00000262428,ENSP00000357709,ENSP00000378669,ENSP00000439012,ENSP00000446252	ALDOA,COTL1,CTSD,DBI,S100A6,SERPINF1,SOD2
PMID:28264936	(2017) Deletion of ribosomal protein genes is a common vulnerability in human cancer, especially in concert with TP53 mutations.	6	24	0.00043	ENSP00000346088,ENSP00000369757,ENSP00000379506,ENSP00000418868,ENSP00000463784,ENSP00000470972	RPL14,RPL22,RPL26,RPL29,RPS19,RPS6
PMID:28762175	(2017) Genetic mutations in RNA-binding proteins and their roles in ALS.	7	42	0.00043	ENSP00000283179,ENSP00000300738,ENSP00000325376,ENSP00000354346,ENSP00000362820,ENSP00000380033,ENSP00000400142	DDX17,EWSR1,HNRNPM,HNRNPU,MATR3,RRM1,SRSF3
PMID:28801479	(2017) The role of interactions of long non-coding RNAs and heterogeneous nuclear ribonucleoproteins in regulating cellular functions.	7	42	0.00043	ENSP00000246194,ENSP00000283179,ENSP00000325376,ENSP00000326381,ENSP00000352438,ENSP00000400142,ENSP00000474412	CCL5,EIF4A2,EWSR1,HNRNPM,HNRNPU,PCBP2,RALY
PMID:29530001	(2018) Diagnostic and prognostic implications of ribosomal protein transcript expression patterns in human cancers.	6	24	0.00043	ENSP00000251453,ENSP00000339795,ENSP00000346050,ENSP00000362744,ENSP00000435096,ENSP00000470972	RPL7,RPS16,RPS19,RPS25,RPS3A,RPS4X

## Sheet: KEGG Pathway
#term ID	term description	observed gene count	background gene count	false discovery rate	matching proteins in your network (IDs)	matching proteins in your network (labels)
hsa03010	Ribosome	28	130	1.49e-27	ENSP00000222247,ENSP00000230050,ENSP00000251453,ENSP00000296674,ENSP00000307889,ENSP00000309334,ENSP00000339095,ENSP00000339795,ENSP00000346037,ENSP00000346050,ENSP00000346088,ENSP00000348849,ENSP00000361076,ENSP00000362744,ENSP00000363018,ENSP00000369757,ENSP00000375730,ENSP00000378163,ENSP00000379339,ENSP00000379506,ENSP00000413436,ENSP00000416429,ENSP00000418082,ENSP00000418868,ENSP00000435096…	RPL10,RPL10A,RPL13,RPL13A,RPL14,RPL15,RPL18A,RPL22,RPL26,RPL29,RPL32,RPL34,RPL37A,RPL7,RPL7A,RPLP1,RPS12,RPS16,RPS19,RPS23,RPS25,RPS26,RPS29,RPS3A,RPS4X,RPS5,RPS6,RPS7
hsa00480	Glutathione metabolism	4	50	0.0439	ENSP00000270776,ENSP00000275428,ENSP00000300738,ENSP00000381607	GGCT,GSTP1,PGD,RRM1
hsa01200	Carbon metabolism	6	116	0.0439	ENSP00000270776,ENSP00000357535,ENSP00000361512,ENSP00000364649,ENSP00000378669,ENSP00000402103	ALDOA,ECHS1,HK1,PGD,PRPS1,SDHB
hsa03040	Spliceosome	6	130	0.0439	ENSP00000225792,ENSP00000283179,ENSP00000325376,ENSP00000360532,ENSP00000362820,ENSP00000412566	CDC5L,DDX5,HNRNPM,HNRNPU,SNRPB,SRSF3
hsa03050	Proteasome	4	43	0.0439	ENSP00000216802,ENSP00000310129,ENSP00000364016,ENSP00000414359	PSMA1,PSMB8,PSMD2,PSME2
hsa05322	Systemic lupus erythematosus	5	94	0.0439	ENSP00000308405,ENSP00000385479,ENSP00000412566,ENSP00000423563,ENSP00000434024	H2AFV,H2AFX,H2AFY,HIST2H3A,SNRPB

## Sheet: RCTM Pathway
#term ID	term description	observed gene count	background gene count	false discovery rate	matching proteins in your network (IDs)	matching proteins in your network (labels)
HSA-156842	Eukaryotic Translation Elongation	29	90	1.78e-32	ENSP00000222247,ENSP00000230050,ENSP00000251453,ENSP00000296674,ENSP00000307889,ENSP00000309334,ENSP00000339095,ENSP00000339795,ENSP00000346037,ENSP00000346050,ENSP00000346088,ENSP00000348849,ENSP00000361076,ENSP00000362744,ENSP00000363018,ENSP00000369757,ENSP00000375730,ENSP00000376056,ENSP00000378163,ENSP00000379339,ENSP00000379506,ENSP00000413436,ENSP00000416429,ENSP00000418082,ENSP00000418868…	EEF1B2,RPL10,RPL10A,RPL13,RPL13A,RPL14,RPL15,RPL18A,RPL22,RPL26,RPL29,RPL32,RPL34,RPL37A,RPL7,RPL7A,RPLP1,RPS12,RPS16,RPS19,RPS23,RPS25,RPS26,RPS29,RPS3A,RPS4X,RPS5,RPS6,RPS7
HSA-156827	L13a-mediated translational silencing of Ceruloplasmin expression	30	107	1.92e-32	ENSP00000222247,ENSP00000230050,ENSP00000251453,ENSP00000296674,ENSP00000307889,ENSP00000309334,ENSP00000326381,ENSP00000339095,ENSP00000339795,ENSP00000346037,ENSP00000346050,ENSP00000346088,ENSP00000348849,ENSP00000358140,ENSP00000361076,ENSP00000362744,ENSP00000363018,ENSP00000369757,ENSP00000375730,ENSP00000378163,ENSP00000379339,ENSP00000379506,ENSP00000413436,ENSP00000416429,ENSP00000418082…	EIF3A,EIF4A2,RPL10,RPL10A,RPL13,RPL13A,RPL14,RPL15,RPL18A,RPL22,RPL26,RPL29,RPL32,RPL34,RPL37A,RPL7,RPL7A,RPLP1,RPS12,RPS16,RPS19,RPS23,RPS25,RPS26,RPS29,RPS3A,RPS4X,RPS5,RPS6,RPS7
HSA-72706	GTP hydrolysis and joining of the 60S ribosomal subunit	30	108	1.92e-32	ENSP00000222247,ENSP00000230050,ENSP00000251453,ENSP00000296674,ENSP00000307889,ENSP00000309334,ENSP00000326381,ENSP00000339095,ENSP00000339795,ENSP00000346037,ENSP00000346050,ENSP00000346088,ENSP00000348849,ENSP00000358140,ENSP00000361076,ENSP00000362744,ENSP00000363018,ENSP00000369757,ENSP00000375730,ENSP00000378163,ENSP00000379339,ENSP00000379506,ENSP00000413436,ENSP00000416429,ENSP00000418082…	EIF3A,EIF4A2,RPL10,RPL10A,RPL13,RPL13A,RPL14,RPL15,RPL18A,RPL22,RPL26,RPL29,RPL32,RPL34,RPL37A,RPL7,RPL7A,RPLP1,RPS12,RPS16,RPS19,RPS23,RPS25,RPS26,RPS29,RPS3A,RPS4X,RPS5,RPS6,RPS7
HSA-72689	Formation of a pool of free 40S subunits	29	98	3.6e-32	ENSP00000222247,ENSP00000230050,ENSP00000251453,ENSP00000296674,ENSP00000307889,ENSP00000309334,ENSP00000339095,ENSP00000339795,ENSP00000346037,ENSP00000346050,ENSP00000346088,ENSP00000348849,ENSP00000358140,ENSP00000361076,ENSP00000362744,ENSP00000363018,ENSP00000369757,ENSP00000375730,ENSP00000378163,ENSP00000379339,ENSP00000379506,ENSP00000413436,ENSP00000416429,ENSP00000418082,ENSP00000418868…	EIF3A,RPL10,RPL10A,RPL13,RPL13A,RPL14,RPL15,RPL18A,RPL22,RPL26,RPL29,RPL32,RPL34,RPL37A,RPL7,RPL7A,RPLP1,RPS12,RPS16,RPS19,RPS23,RPS25,RPS26,RPS29,RPS3A,RPS4X,RPS5,RPS6,RPS7
HSA-156902	Peptide chain elongation	28	86	4.44e-32	ENSP00000222247,ENSP00000230050,ENSP00000251453,ENSP00000296674,ENSP00000307889,ENSP00000309334,ENSP00000339095,ENSP00000339795,ENSP00000346037,ENSP00000346050,ENSP00000346088,ENSP00000348849,ENSP00000361076,ENSP00000362744,ENSP00000363018,ENSP00000369757,ENSP00000375730,ENSP00000378163,ENSP00000379339,ENSP00000379506,ENSP00000413436,ENSP00000416429,ENSP00000418082,ENSP00000418868,ENSP00000435096…	RPL10,RPL10A,RPL13,RPL13A,RPL14,RPL15,RPL18A,RPL22,RPL26,RPL29,RPL32,RPL34,RPL37A,RPL7,RPL7A,RPLP1,RPS12,RPS16,RPS19,RPS23,RPS25,RPS26,RPS29,RPS3A,RPS4X,RPS5,RPS6,RPS7
HSA-192823	Viral mRNA Translation	28	86	4.44e-32	ENSP00000222247,ENSP00000230050,ENSP00000251453,ENSP00000296674,ENSP00000307889,ENSP00000309334,ENSP00000339095,ENSP00000339795,ENSP00000346037,ENSP00000346050,ENSP00000346088,ENSP00000348849,ENSP00000361076,ENSP00000362744,ENSP00000363018,ENSP00000369757,ENSP00000375730,ENSP00000378163,ENSP00000379339,ENSP00000379506,ENSP00000413436,ENSP00000416429,ENSP00000418082,ENSP00000418868,ENSP00000435096…	RPL10,RPL10A,RPL13,RPL13A,RPL14,RPL15,RPL18A,RPL22,RPL26,RPL29,RPL32,RPL34,RPL37A,RPL7,RPL7A,RPLP1,RPS12,RPS16,RPS19,RPS23,RPS25,RPS26,RPS29,RPS3A,RPS4X,RPS5,RPS6,RPS7
HSA-72613	Eukaryotic Translation Initiation	30	115	4.44e-32	ENSP00000222247,ENSP00000230050,ENSP00000251453,ENSP00000296674,ENSP00000307889,ENSP00000309334,ENSP00000326381,ENSP00000339095,ENSP00000339795,ENSP00000346037,ENSP00000346050,ENSP00000346088,ENSP00000348849,ENSP00000358140,ENSP00000361076,ENSP00000362744,ENSP00000363018,ENSP00000369757,ENSP00000375730,ENSP00000378163,ENSP00000379339,ENSP00000379506,ENSP00000413436,ENSP00000416429,ENSP00000418082…	EIF3A,EIF4A2,RPL10,RPL10A,RPL13,RPL13A,RPL14,RPL15,RPL18A,RPL22,RPL26,RPL29,RPL32,RPL34,RPL37A,RPL7,RPL7A,RPLP1,RPS12,RPS16,RPS19,RPS23,RPS25,RPS26,RPS29,RPS3A,RPS4X,RPS5,RPS6,RPS7
HSA-72737	Cap-dependent Translation Initiation	30	115	4.44e-32	ENSP00000222247,ENSP00000230050,ENSP00000251453,ENSP00000296674,ENSP00000307889,ENSP00000309334,ENSP00000326381,ENSP00000339095,ENSP00000339795,ENSP00000346037,ENSP00000346050,ENSP00000346088,ENSP00000348849,ENSP00000358140,ENSP00000361076,ENSP00000362744,ENSP00000363018,ENSP00000369757,ENSP00000375730,ENSP00000378163,ENSP00000379339,ENSP00000379506,ENSP00000413436,ENSP00000416429,ENSP00000418082…	EIF3A,EIF4A2,RPL10,RPL10A,RPL13,RPL13A,RPL14,RPL15,RPL18A,RPL22,RPL26,RPL29,RPL32,RPL34,RPL37A,RPL7,RPL7A,RPLP1,RPS12,RPS16,RPS19,RPS23,RPS25,RPS26,RPS29,RPS3A,RPS4X,RPS5,RPS6,RPS7
HSA-2408557	Selenocysteine synthesis	28	90	7.22e-32	ENSP00000222247,ENSP00000230050,ENSP00000251453,ENSP00000296674,ENSP00000307889,ENSP00000309334,ENSP00000339095,ENSP00000339795,ENSP00000346037,ENSP00000346050,ENSP00000346088,ENSP00000348849,ENSP00000361076,ENSP00000362744,ENSP00000363018,ENSP00000369757,ENSP00000375730,ENSP00000378163,ENSP00000379339,ENSP00000379506,ENSP00000413436,ENSP00000416429,ENSP00000418082,ENSP00000418868,ENSP00000435096…	RPL10,RPL10A,RPL13,RPL13A,RPL14,RPL15,RPL18A,RPL22,RPL26,RPL29,RPL32,RPL34,RPL37A,RPL7,RPL7A,RPLP1,RPS12,RPS16,RPS19,RPS23,RPS25,RPS26,RPS29,RPS3A,RPS4X,RPS5,RPS6,RPS7
HSA-72764	Eukaryotic Translation Termination	28	90	7.22e-32	ENSP00000222247,ENSP00000230050,ENSP00000251453,ENSP00000296674,ENSP00000307889,ENSP00000309334,ENSP00000339095,ENSP00000339795,ENSP00000346037,ENSP00000346050,ENSP00000346088,ENSP00000348849,ENSP00000361076,ENSP00000362744,ENSP00000363018,ENSP00000369757,ENSP00000375730,ENSP00000378163,ENSP00000379339,ENSP00000379506,ENSP00000413436,ENSP00000416429,ENSP00000418082,ENSP00000418868,ENSP00000435096…	RPL10,RPL10A,RPL13,RPL13A,RPL14,RPL15,RPL18A,RPL22,RPL26,RPL29,RPL32,RPL34,RPL37A,RPL7,RPL7A,RPLP1,RPS12,RPS16,RPS19,RPS23,RPS25,RPS26,RPS29,RPS3A,RPS4X,RPS5,RPS6,RPS7
HSA-975956	Nonsense Mediated Decay (NMD) independent of the Exon Junction Complex (EJC)	28	92	9.95e-32	ENSP00000222247,ENSP00000230050,ENSP00000251453,ENSP00000296674,ENSP00000307889,ENSP00000309334,ENSP00000339095,ENSP00000339795,ENSP00000346037,ENSP00000346050,ENSP00000346088,ENSP00000348849,ENSP00000361076,ENSP00000362744,ENSP00000363018,ENSP00000369757,ENSP00000375730,ENSP00000378163,ENSP00000379339,ENSP00000379506,ENSP00000413436,ENSP00000416429,ENSP00000418082,ENSP00000418868,ENSP00000435096…	RPL10,RPL10A,RPL13,RPL13A,RPL14,RPL15,RPL18A,RPL22,RPL26,RPL29,RPL32,RPL34,RPL37A,RPL7,RPL7A,RPLP1,RPS12,RPS16,RPS19,RPS23,RPS25,RPS26,RPS29,RPS3A,RPS4X,RPS5,RPS6,RPS7
HSA-1799339	SRP-dependent cotranslational protein targeting to membrane	29	109	1.68e-31	ENSP00000222247,ENSP00000230050,ENSP00000251453,ENSP00000267884,ENSP00000296674,ENSP00000307889,ENSP00000309334,ENSP00000339095,ENSP00000339795,ENSP00000346037,ENSP00000346050,ENSP00000346088,ENSP00000348849,ENSP00000361076,ENSP00000362744,ENSP00000363018,ENSP00000369757,ENSP00000375730,ENSP00000378163,ENSP00000379339,ENSP00000379506,ENSP00000413436,ENSP00000416429,ENSP00000418082,ENSP00000418868…	RPL10,RPL10A,RPL13,RPL13A,RPL14,RPL15,RPL18A,RPL22,RPL26,RPL29,RPL32,RPL34,RPL37A,RPL7,RPL7A,RPLP1,RPS12,RPS16,RPS19,RPS23,RPS25,RPS26,RPS29,RPS3A,RPS4X,RPS5,RPS6,RPS7,SRP14
HSA-9010553	Regulation of expression of SLITs and ROBOs	32	164	3.38e-31	ENSP00000216802,ENSP00000222247,ENSP00000230050,ENSP00000251453,ENSP00000296674,ENSP00000307889,ENSP00000309334,ENSP00000310129,ENSP00000339095,ENSP00000339795,ENSP00000346037,ENSP00000346050,ENSP00000346088,ENSP00000348849,ENSP00000361076,ENSP00000362744,ENSP00000363018,ENSP00000364016,ENSP00000369757,ENSP00000375730,ENSP00000378163,ENSP00000379339,ENSP00000379506,ENSP00000413436,ENSP00000414359…	PSMA1,PSMB8,PSMD2,PSME2,RPL10,RPL10A,RPL13,RPL13A,RPL14,RPL15,RPL18A,RPL22,RPL26,RPL29,RPL32,RPL34,RPL37A,RPL7,RPL7A,RPLP1,RPS12,RPS16,RPS19,RPS23,RPS25,RPS26,RPS29,RPS3A,RPS4X,RPS5,RPS6,RPS7
HSA-2408522	Selenoamino acid metabolism	28	112	8.7e-30	ENSP00000222247,ENSP00000230050,ENSP00000251453,ENSP00000296674,ENSP00000307889,ENSP00000309334,ENSP00000339095,ENSP00000339795,ENSP00000346037,ENSP00000346050,ENSP00000346088,ENSP00000348849,ENSP00000361076,ENSP00000362744,ENSP00000363018,ENSP00000369757,ENSP00000375730,ENSP00000378163,ENSP00000379339,ENSP00000379506,ENSP00000413436,ENSP00000416429,ENSP00000418082,ENSP00000418868,ENSP00000435096…	RPL10,RPL10A,RPL13,RPL13A,RPL14,RPL15,RPL18A,RPL22,RPL26,RPL29,RPL32,RPL34,RPL37A,RPL7,RPL7A,RPLP1,RPS12,RPS16,RPS19,RPS23,RPS25,RPS26,RPS29,RPS3A,RPS4X,RPS5,RPS6,RPS7
HSA-927802	Nonsense-Mediated Decay (NMD)	28	112	8.7e-30	ENSP00000222247,ENSP00000230050,ENSP00000251453,ENSP00000296674,ENSP00000307889,ENSP00000309334,ENSP00000339095,ENSP00000339795,ENSP00000346037,ENSP00000346050,ENSP00000346088,ENSP00000348849,ENSP00000361076,ENSP00000362744,ENSP00000363018,ENSP00000369757,ENSP00000375730,ENSP00000378163,ENSP00000379339,ENSP00000379506,ENSP00000413436,ENSP00000416429,ENSP00000418082,ENSP00000418868,ENSP00000435096…	RPL10,RPL10A,RPL13,RPL13A,RPL14,RPL15,RPL18A,RPL22,RPL26,RPL29,RPL32,RPL34,RPL37A,RPL7,RPL7A,RPLP1,RPS12,RPS16,RPS19,RPS23,RPS25,RPS26,RPS29,RPS3A,RPS4X,RPS5,RPS6,RPS7
HSA-975957	Nonsense Mediated Decay (NMD) enhanced by the Exon Junction Complex (EJC)	28	112	8.7e-30	ENSP00000222247,ENSP00000230050,ENSP00000251453,ENSP00000296674,ENSP00000307889,ENSP00000309334,ENSP00000339095,ENSP00000339795,ENSP00000346037,ENSP00000346050,ENSP00000346088,ENSP00000348849,ENSP00000361076,ENSP00000362744,ENSP00000363018,ENSP00000369757,ENSP00000375730,ENSP00000378163,ENSP00000379339,ENSP00000379506,ENSP00000413436,ENSP00000416429,ENSP00000418082,ENSP00000418868,ENSP00000435096…	RPL10,RPL10A,RPL13,RPL13A,RPL14,RPL15,RPL18A,RPL22,RPL26,RPL29,RPL32,RPL34,RPL37A,RPL7,RPL7A,RPLP1,RPS12,RPS16,RPS19,RPS23,RPS25,RPS26,RPS29,RPS3A,RPS4X,RPS5,RPS6,RPS7
HSA-376176	Signaling by ROBO receptors	33	210	1.34e-29	ENSP00000216802,ENSP00000222247,ENSP00000230050,ENSP00000251453,ENSP00000296674,ENSP00000307889,ENSP00000309334,ENSP00000310129,ENSP00000339095,ENSP00000339795,ENSP00000346037,ENSP00000346050,ENSP00000346088,ENSP00000348461,ENSP00000348849,ENSP00000361076,ENSP00000362744,ENSP00000363018,ENSP00000364016,ENSP00000369757,ENSP00000375730,ENSP00000378163,ENSP00000379339,ENSP00000379506,ENSP00000413436…	PSMA1,PSMB8,PSMD2,PSME2,RAC1,RPL10,RPL10A,RPL13,RPL13A,RPL14,RPL15,RPL18A,RPL22,RPL26,RPL29,RPL32,RPL34,RPL37A,RPL7,RPL7A,RPLP1,RPS12,RPS16,RPS19,RPS23,RPS25,RPS26,RPS29,RPS3A,RPS4X,RPS5,RPS6,RPS7
HSA-168273	Influenza Viral RNA Transcription and Replication	28	128	1.73e-28	ENSP00000222247,ENSP00000230050,ENSP00000251453,ENSP00000296674,ENSP00000307889,ENSP00000309334,ENSP00000339095,ENSP00000339795,ENSP00000346037,ENSP00000346050,ENSP00000346088,ENSP00000348849,ENSP00000361076,ENSP00000362744,ENSP00000363018,ENSP00000369757,ENSP00000375730,ENSP00000378163,ENSP00000379339,ENSP00000379506,ENSP00000413436,ENSP00000416429,ENSP00000418082,ENSP00000418868,ENSP00000435096…	RPL10,RPL10A,RPL13,RPL13A,RPL14,RPL15,RPL18A,RPL22,RPL26,RPL29,RPL32,RPL34,RPL37A,RPL7,RPL7A,RPLP1,RPS12,RPS16,RPS19,RPS23,RPS25,RPS26,RPS29,RPS3A,RPS4X,RPS5,RPS6,RPS7
HSA-168255	Influenza Life Cycle	28	137	8.66e-28	ENSP00000222247,ENSP00000230050,ENSP00000251453,ENSP00000296674,ENSP00000307889,ENSP00000309334,ENSP00000339095,ENSP00000339795,ENSP00000346037,ENSP00000346050,ENSP00000346088,ENSP00000348849,ENSP00000361076,ENSP00000362744,ENSP00000363018,ENSP00000369757,ENSP00000375730,ENSP00000378163,ENSP00000379339,ENSP00000379506,ENSP00000413436,ENSP00000416429,ENSP00000418082,ENSP00000418868,ENSP00000435096…	RPL10,RPL10A,RPL13,RPL13A,RPL14,RPL15,RPL18A,RPL22,RPL26,RPL29,RPL32,RPL34,RPL37A,RPL7,RPL7A,RPLP1,RPS12,RPS16,RPS19,RPS23,RPS25,RPS26,RPS29,RPS3A,RPS4X,RPS5,RPS6,RPS7
HSA-72312	rRNA processing	31	199	1.09e-27	ENSP00000168216,ENSP00000221801,ENSP00000222247,ENSP00000230050,ENSP00000251453,ENSP00000296674,ENSP00000307889,ENSP00000309334,ENSP00000318195,ENSP00000339095,ENSP00000339795,ENSP00000346037,ENSP00000346050,ENSP00000346088,ENSP00000348849,ENSP00000361076,ENSP00000362744,ENSP00000363018,ENSP00000369757,ENSP00000375730,ENSP00000378163,ENSP00000379339,ENSP00000379506,ENSP00000413436,ENSP00000416429…	FBL,HSD17B10,NCL,RPL10,RPL10A,RPL13,RPL13A,RPL14,RPL15,RPL18A,RPL22,RPL26,RPL29,RPL32,RPL34,RPL37A,RPL7,RPL7A,RPLP1,RPS12,RPS16,RPS19,RPS23,RPS25,RPS26,RPS29,RPS3A,RPS4X,RPS5,RPS6,RPS7
HSA-6791226	Major pathway of rRNA processing in the nucleolus and cytosol	30	179	1.27e-27	ENSP00000221801,ENSP00000222247,ENSP00000230050,ENSP00000251453,ENSP00000296674,ENSP00000307889,ENSP00000309334,ENSP00000318195,ENSP00000339095,ENSP00000339795,ENSP00000346037,ENSP00000346050,ENSP00000346088,ENSP00000348849,ENSP00000361076,ENSP00000362744,ENSP00000363018,ENSP00000369757,ENSP00000375730,ENSP00000378163,ENSP00000379339,ENSP00000379506,ENSP00000413436,ENSP00000416429,ENSP00000418082…	FBL,NCL,RPL10,RPL10A,RPL13,RPL13A,RPL14,RPL15,RPL18A,RPL22,RPL26,RPL29,RPL32,RPL34,RPL37A,RPL7,RPL7A,RPLP1,RPS12,RPS16,RPS19,RPS23,RPS25,RPS26,RPS29,RPS3A,RPS4X,RPS5,RPS6,RPS7
HSA-168254	Influenza Infection	28	148	4.98e-27	ENSP00000222247,ENSP00000230050,ENSP00000251453,ENSP00000296674,ENSP00000307889,ENSP00000309334,ENSP00000339095,ENSP00000339795,ENSP00000346037,ENSP00000346050,ENSP00000346088,ENSP00000348849,ENSP00000361076,ENSP00000362744,ENSP00000363018,ENSP00000369757,ENSP00000375730,ENSP00000378163,ENSP00000379339,ENSP00000379506,ENSP00000413436,ENSP00000416429,ENSP00000418082,ENSP00000418868,ENSP00000435096…	RPL10,RPL10A,RPL13,RPL13A,RPL14,RPL15,RPL18A,RPL22,RPL26,RPL29,RPL32,RPL34,RPL37A,RPL7,RPL7A,RPLP1,RPS12,RPS16,RPS19,RPS23,RPS25,RPS26,RPS29,RPS3A,RPS4X,RPS5,RPS6,RPS7
HSA-8868773	rRNA processing in the nucleus and cytosol	30	189	4.98e-27	ENSP00000221801,ENSP00000222247,ENSP00000230050,ENSP00000251453,ENSP00000296674,ENSP00000307889,ENSP00000309334,ENSP00000318195,ENSP00000339095,ENSP00000339795,ENSP00000346037,ENSP00000346050,ENSP00000346088,ENSP00000348849,ENSP00000361076,ENSP00000362744,ENSP00000363018,ENSP00000369757,ENSP00000375730,ENSP00000378163,ENSP00000379339,ENSP00000379506,ENSP00000413436,ENSP00000416429,ENSP00000418082…	FBL,NCL,RPL10,RPL10A,RPL13,RPL13A,RPL14,RPL15,RPL18A,RPL22,RPL26,RPL29,RPL32,RPL34,RPL37A,RPL7,RPL7A,RPLP1,RPS12,RPS16,RPS19,RPS23,RPS25,RPS26,RPS29,RPS3A,RPS4X,RPS5,RPS6,RPS7
HSA-8953854	Metabolism of RNA	45	652	6.22e-27	ENSP00000168216,ENSP00000216038,ENSP00000216802,ENSP00000221801,ENSP00000222247,ENSP00000225792,ENSP00000230050,ENSP00000251453,ENSP00000263697,ENSP00000283179,ENSP00000296674,ENSP00000307889,ENSP00000309334,ENSP00000310129,ENSP00000318195,ENSP00000325376,ENSP00000326381,ENSP00000339095,ENSP00000339795,ENSP00000346037,ENSP00000346050,ENSP00000346088,ENSP00000348849,ENSP00000352438,ENSP00000360532…	CDC5L,DDX5,DNAJC8,EIF4A2,FBL,HNRNPM,HNRNPU,HSD17B10,NCL,PCBP2,PSMA1,PSMB8,PSMD2,PSME2,RPL10,RPL10A,RPL13,RPL13A,RPL14,RPL15,RPL18A,RPL22,RPL26,RPL29,RPL32,RPL34,RPL37A,RPL7,RPL7A,RPLP1,RPS12,RPS16,RPS19,RPS23,RPS25,RPS26,RPS29,RPS3A,RPS4X,RPS5,RPS6,RPS7,RTCB,SNRPB,SRSF3
HSA-5663205	Infectious disease	35	363	4.77e-25	ENSP00000216802,ENSP00000222247,ENSP00000230050,ENSP00000251453,ENSP00000296674,ENSP00000307889,ENSP00000309334,ENSP00000310129,ENSP00000339095,ENSP00000339795,ENSP00000346037,ENSP00000346050,ENSP00000346088,ENSP00000348461,ENSP00000348849,ENSP00000352257,ENSP00000360671,ENSP00000361076,ENSP00000362744,ENSP00000363018,ENSP00000364016,ENSP00000369757,ENSP00000375730,ENSP00000378163,ENSP00000379339…	PSMA1,PSMB8,PSMD2,PSME2,RAC1,RPL10,RPL10A,RPL13,RPL13A,RPL14,RPL15,RPL18A,RPL22,RPL26,RPL29,RPL32,RPL34,RPL37A,RPL7,RPL7A,RPLP1,RPS12,RPS16,RPS19,RPS23,RPS25,RPS26,RPS29,RPS3A,RPS4X,RPS5,RPS6,RPS7,SLC25A5,XRCC6
HSA-72766	Translation	32	288	1.46e-24	ENSP00000222247,ENSP00000230050,ENSP00000251453,ENSP00000267884,ENSP00000296674,ENSP00000307889,ENSP00000309334,ENSP00000326381,ENSP00000339095,ENSP00000339795,ENSP00000346037,ENSP00000346050,ENSP00000346088,ENSP00000348849,ENSP00000358140,ENSP00000361076,ENSP00000362744,ENSP00000363018,ENSP00000369757,ENSP00000375730,ENSP00000376056,ENSP00000378163,ENSP00000379339,ENSP00000379506,ENSP00000413436…	EEF1B2,EIF3A,EIF4A2,RPL10,RPL10A,RPL13,RPL13A,RPL14,RPL15,RPL18A,RPL22,RPL26,RPL29,RPL32,RPL34,RPL37A,RPL7,RPL7A,RPLP1,RPS12,RPS16,RPS19,RPS23,RPS25,RPS26,RPS29,RPS3A,RPS4X,RPS5,RPS6,RPS7,SRP14
HSA-71291	Metabolism of amino acids and derivatives	33	354	3.81e-23	ENSP00000168216,ENSP00000216802,ENSP00000222247,ENSP00000230050,ENSP00000251453,ENSP00000296674,ENSP00000307889,ENSP00000309334,ENSP00000310129,ENSP00000339095,ENSP00000339795,ENSP00000346037,ENSP00000346050,ENSP00000346088,ENSP00000348849,ENSP00000361076,ENSP00000362744,ENSP00000363018,ENSP00000364016,ENSP00000369757,ENSP00000375730,ENSP00000378163,ENSP00000379339,ENSP00000379506,ENSP00000413436…	HSD17B10,PSMA1,PSMB8,PSMD2,PSME2,RPL10,RPL10A,RPL13,RPL13A,RPL14,RPL15,RPL18A,RPL22,RPL26,RPL29,RPL32,RPL34,RPL37A,RPL7,RPL7A,RPLP1,RPS12,RPS16,RPS19,RPS23,RPS25,RPS26,RPS29,RPS3A,RPS4X,RPS5,RPS6,RPS7
HSA-422475	Axon guidance	36	541	9.77e-21	ENSP00000216802,ENSP00000222247,ENSP00000228825,ENSP00000230050,ENSP00000251453,ENSP00000296674,ENSP00000307889,ENSP00000309334,ENSP00000310129,ENSP00000339095,ENSP00000339795,ENSP00000346037,ENSP00000346050,ENSP00000346088,ENSP00000348461,ENSP00000348849,ENSP00000361076,ENSP00000362744,ENSP00000363018,ENSP00000364016,ENSP00000364893,ENSP00000369757,ENSP00000375730,ENSP00000378163,ENSP00000379339…	ARHGEF7,ARPC3,ITGB1,PSMA1,PSMB8,PSMD2,PSME2,RAC1,RPL10,RPL10A,RPL13,RPL13A,RPL14,RPL15,RPL18A,RPL22,RPL26,RPL29,RPL32,RPL34,RPL37A,RPL7,RPL7A,RPLP1,RPS12,RPS16,RPS19,RPS23,RPS25,RPS26,RPS29,RPS3A,RPS4X,RPS5,RPS6,RPS7
HSA-1643685	Disease	42	1018	5.23e-17	ENSP00000216802,ENSP00000222247,ENSP00000230050,ENSP00000247153,ENSP00000251453,ENSP00000261405,ENSP00000296674,ENSP00000301522,ENSP00000307889,ENSP00000309334,ENSP00000310129,ENSP00000339095,ENSP00000339795,ENSP00000346037,ENSP00000346050,ENSP00000346088,ENSP00000346762,ENSP00000348461,ENSP00000348849,ENSP00000352257,ENSP00000360671,ENSP00000361076,ENSP00000362744,ENSP00000363018,ENSP00000364016…	CFP,HK1,LRRFIP1,PRDX2,PSMA1,PSMB8,PSMD2,PSME2,RAC1,RPL10,RPL10A,RPL13,RPL13A,RPL14,RPL15,RPL18A,RPL22,RPL26,RPL29,RPL32,RPL34,RPL37A,RPL7,RPL7A,RPLP1,RPS12,RPS16,RPS19,RPS23,RPS25,RPS26,RPS29,RPS3A,RPS4X,RPS5,RPS6,RPS7,SLC25A5,SND1,SOD2,VWF,XRCC6
HSA-1266738	Developmental Biology	40	1023	2.29e-15	ENSP00000216802,ENSP00000222247,ENSP00000228825,ENSP00000230050,ENSP00000251453,ENSP00000264010,ENSP00000296674,ENSP00000307889,ENSP00000308405,ENSP00000309334,ENSP00000310129,ENSP00000339095,ENSP00000339795,ENSP00000346037,ENSP00000346050,ENSP00000346088,ENSP00000348461,ENSP00000348849,ENSP00000361076,ENSP00000362744,ENSP00000363018,ENSP00000364016,ENSP00000364893,ENSP00000369757,ENSP00000375730…	ARHGEF7,ARPC3,CTCF,H2AFV,H2AFX,HIST2H3A,ITGB1,PSMA1,PSMB8,PSMD2,PSME2,RAC1,RPL10,RPL10A,RPL13,RPL13A,RPL14,RPL15,RPL18A,RPL22,RPL26,RPL29,RPL32,RPL34,RPL37A,RPL7,RPL7A,RPLP1,RPS12,RPS16,RPS19,RPS23,RPS25,RPS26,RPS29,RPS3A,RPS4X,RPS5,RPS6,RPS7
HSA-72649	Translation initiation complex formation	14	55	5.37e-15	ENSP00000230050,ENSP00000251453,ENSP00000296674,ENSP00000326381,ENSP00000339095,ENSP00000346050,ENSP00000348849,ENSP00000358140,ENSP00000362744,ENSP00000369757,ENSP00000379339,ENSP00000435096,ENSP00000470972,ENSP00000472985	EIF3A,EIF4A2,RPS12,RPS16,RPS19,RPS23,RPS25,RPS26,RPS29,RPS3A,RPS4X,RPS5,RPS6,RPS7
HSA-72702	Ribosomal scanning and start codon recognition	14	55	5.37e-15	ENSP00000230050,ENSP00000251453,ENSP00000296674,ENSP00000326381,ENSP00000339095,ENSP00000346050,ENSP00000348849,ENSP00000358140,ENSP00000362744,ENSP00000369757,ENSP00000379339,ENSP00000435096,ENSP00000470972,ENSP00000472985	EIF3A,EIF4A2,RPS12,RPS16,RPS19,RPS23,RPS25,RPS26,RPS29,RPS3A,RPS4X,RPS5,RPS6,RPS7
HSA-72662	Activation of the mRNA upon binding of the cap-binding complex and eIFs, and subsequent binding to 43S	14	56	6.26e-15	ENSP00000230050,ENSP00000251453,ENSP00000296674,ENSP00000326381,ENSP00000339095,ENSP00000346050,ENSP00000348849,ENSP00000358140,ENSP00000362744,ENSP00000369757,ENSP00000379339,ENSP00000435096,ENSP00000470972,ENSP00000472985	EIF3A,EIF4A2,RPS12,RPS16,RPS19,RPS23,RPS25,RPS26,RPS29,RPS3A,RPS4X,RPS5,RPS6,RPS7
HSA-392499	Metabolism of proteins	53	1948	2.29e-14	ENSP00000216802,ENSP00000217131,ENSP00000222247,ENSP00000225792,ENSP00000230050,ENSP00000236671,ENSP00000247153,ENSP00000251453,ENSP00000263354,ENSP00000264710,ENSP00000267884,ENSP00000275603,ENSP00000285208,ENSP00000296674,ENSP00000299427,ENSP00000306362,ENSP00000307889,ENSP00000309334,ENSP00000310129,ENSP00000312734,ENSP00000326381,ENSP00000339095,ENSP00000339795,ENSP00000346037,ENSP00000346050…	AGT,CCT6A,CFP,CTSD,CTSZ,DDX17,DDX5,EEF1B2,EIF3A,EIF4A2,H2AFX,HIST2H3A,LTBP1,NAPA,PSMA1,PSMB8,PSMD2,PSME2,RAB10,RAB6B,RAB8B,RPL10,RPL10A,RPL13,RPL13A,RPL14,RPL15,RPL18A,RPL22,RPL26,RPL29,RPL32,RPL34,RPL37A,RPL7,RPL7A,RPLP1,RPS12,RPS16,RPS19,RPS23,RPS25,RPS26,RPS29,RPS3A,RPS4X,RPS5,RPS6,RPS7,SEC31A,SRP14,TBCA,TPP1
HSA-1430728	Metabolism	54	2032	2.84e-14	ENSP00000168216,ENSP00000216802,ENSP00000221957,ENSP00000222247,ENSP00000222381,ENSP00000228740,ENSP00000230050,ENSP00000251453,ENSP00000260402,ENSP00000264380,ENSP00000270776,ENSP00000275428,ENSP00000285379,ENSP00000286621,ENSP00000290299,ENSP00000296674,ENSP00000300738,ENSP00000307889,ENSP00000309334,ENSP00000310129,ENSP00000339095,ENSP00000339795,ENSP00000346037,ENSP00000346050,ENSP00000346088…	ADK,AGT,ALDOA,ATP5O,CA2,DBI,ECHS1,GGCT,GSTP1,HK1,HSD17B10,LDHB,LTA4H,PGD,PIKFYVE,PLCB2,PLIN3,PON1,PRPS1,PSMA1,PSMB8,PSMD2,PSME2,RPL10,RPL10A,RPL13,RPL13A,RPL14,RPL15,RPL18A,RPL22,RPL26,RPL29,RPL32,RPL34,RPL37A,RPL7,RPL7A,RPLP1,RPS12,RPS16,RPS19,RPS23,RPS25,RPS26,RPS29,RPS3A,RPS4X,RPS5,RPS6,RPS7,RRM1,SDHB,SLC25A5
HSA-72695	Formation of the ternary complex, and subsequently, the 43S complex	13	49	3.49e-14	ENSP00000230050,ENSP00000251453,ENSP00000296674,ENSP00000339095,ENSP00000346050,ENSP00000348849,ENSP00000358140,ENSP00000362744,ENSP00000369757,ENSP00000379339,ENSP00000435096,ENSP00000470972,ENSP00000472985	EIF3A,RPS12,RPS16,RPS19,RPS23,RPS25,RPS26,RPS29,RPS3A,RPS4X,RPS5,RPS6,RPS7
HSA-6798695	Neutrophil degranulation	20	471	4.56e-08	ENSP00000176763,ENSP00000207549,ENSP00000217131,ENSP00000228740,ENSP00000236671,ENSP00000247153,ENSP00000262428,ENSP00000262455,ENSP00000264710,ENSP00000267884,ENSP00000291568,ENSP00000310129,ENSP00000342026,ENSP00000348461,ENSP00000352257,ENSP00000357123,ENSP00000357722,ENSP00000357727,ENSP00000378669,ENSP00000381607	ALDOA,CFP,COTL1,CSTB,CTSD,CTSZ,ERP44,GSTP1,LTA4H,MNDA,PRDX6,PSMD2,RAB10,RAC1,S100A8,S100A9,SRP14,STK10,UNC13D,XRCC6
HSA-168249	Innate Immune System	28	1012	2.59e-07	ENSP00000176763,ENSP00000207549,ENSP00000216802,ENSP00000217131,ENSP00000228740,ENSP00000228825,ENSP00000236671,ENSP00000247153,ENSP00000262428,ENSP00000262455,ENSP00000264710,ENSP00000267884,ENSP00000273398,ENSP00000291568,ENSP00000310129,ENSP00000342026,ENSP00000345968,ENSP00000348461,ENSP00000352257,ENSP00000352438,ENSP00000357123,ENSP00000357722,ENSP00000357727,ENSP00000364016,ENSP00000375857…	ALDOA,ARPC3,ATP6V1A,CFP,COTL1,CSTB,CTSD,CTSZ,ERP44,GSTP1,LRRFIP1,LTA4H,MNDA,PCBP2,PGLYRP2,PRDX6,PSMA1,PSMB8,PSMD2,PSME2,RAB10,RAC1,S100A8,S100A9,SRP14,STK10,UNC13D,XRCC6
HSA-168256	Immune System	35	1925	7.45e-05	ENSP00000176763,ENSP00000207549,ENSP00000216802,ENSP00000217131,ENSP00000228740,ENSP00000228825,ENSP00000236671,ENSP00000245185,ENSP00000247153,ENSP00000262428,ENSP00000262455,ENSP00000264710,ENSP00000267884,ENSP00000273398,ENSP00000291568,ENSP00000310129,ENSP00000326381,ENSP00000342026,ENSP00000345968,ENSP00000348461,ENSP00000352257,ENSP00000352438,ENSP00000357123,ENSP00000357722,ENSP00000357727…	ALDOA,ARPC3,ATP6V1A,CCL5,CFP,COTL1,CSTB,CTSD,CTSZ,EIF4A2,ERP44,GSTP1,HIST2H3A,ITGB1,LRRFIP1,LTA4H,MNDA,MT2A,PCBP2,PGLYRP2,PRDX6,PSMA1,PSMB8,PSMD2,PSME2,RAB10,RAC1,S100A8,S100A9,SEC31A,SOD2,SRP14,STK10,UNC13D,XRCC6
HSA-8939236	RUNX1 regulates transcription of genes involved in differentiation of HSCs	7	96	0.00029	ENSP00000216802,ENSP00000308405,ENSP00000310129,ENSP00000364016,ENSP00000385479,ENSP00000414359,ENSP00000434024	H2AFV,H2AFX,HIST2H3A,PSMA1,PSMB8,PSMD2,PSME2
HSA-2262752	Cellular responses to stress	12	384	0.0013	ENSP00000216802,ENSP00000301522,ENSP00000308405,ENSP00000310129,ENSP00000339566,ENSP00000342026,ENSP00000364016,ENSP00000381607,ENSP00000385479,ENSP00000414359,ENSP00000434024,ENSP00000446252	GSTP1,H2AFV,H2AFX,HIST1H1C,HIST2H3A,PRDX2,PRDX6,PSMA1,PSMB8,PSMD2,PSME2,SOD2
HSA-8953897	Cellular responses to external stimuli	13	459	0.0017	ENSP00000216802,ENSP00000245185,ENSP00000301522,ENSP00000308405,ENSP00000310129,ENSP00000339566,ENSP00000342026,ENSP00000364016,ENSP00000381607,ENSP00000385479,ENSP00000414359,ENSP00000434024,ENSP00000446252	GSTP1,H2AFV,H2AFX,HIST1H1C,HIST2H3A,MT2A,PRDX2,PRDX6,PSMA1,PSMB8,PSMD2,PSME2,SOD2
HSA-72163	mRNA Splicing - Major Pathway	8	178	0.0018	ENSP00000225792,ENSP00000263697,ENSP00000283179,ENSP00000325376,ENSP00000352438,ENSP00000360532,ENSP00000362820,ENSP00000412566	CDC5L,DDX5,DNAJC8,HNRNPM,HNRNPU,PCBP2,SNRPB,SRSF3
HSA-72172	mRNA Splicing	8	186	0.0024	ENSP00000225792,ENSP00000263697,ENSP00000283179,ENSP00000325376,ENSP00000352438,ENSP00000360532,ENSP00000362820,ENSP00000412566	CDC5L,DDX5,DNAJC8,HNRNPM,HNRNPU,PCBP2,SNRPB,SRSF3
HSA-3299685	Detoxification of Reactive Oxygen Species	4	35	0.0034	ENSP00000301522,ENSP00000342026,ENSP00000381607,ENSP00000446252	GSTP1,PRDX2,PRDX6,SOD2
HSA-8878171	Transcriptional regulation by RUNX1	8	201	0.0038	ENSP00000216802,ENSP00000254480,ENSP00000308405,ENSP00000310129,ENSP00000364016,ENSP00000385479,ENSP00000414359,ENSP00000434024	H2AFV,H2AFX,HIST2H3A,PSMA1,PSMB8,PSMD2,PSME2,SMARCC1
HSA-2022377	Metabolism of Angiotensinogen to Angiotensins	3	17	0.0065	ENSP00000217131,ENSP00000236671,ENSP00000355627	AGT,CTSD,CTSZ
HSA-162909	Host Interactions of HIV factors	6	121	0.007	ENSP00000216802,ENSP00000310129,ENSP00000348461,ENSP00000360671,ENSP00000364016,ENSP00000414359	PSMA1,PSMB8,PSMD2,PSME2,RAC1,SLC25A5
HSA-427389	ERCC6 (CSB) and EHMT2 (G9a) positively regulate rRNA expression	4	45	0.0076	ENSP00000308405,ENSP00000349508,ENSP00000385479,ENSP00000434024	CHD4,H2AFV,H2AFX,HIST2H3A
HSA-8939211	ESR-mediated signaling	6	124	0.0076	ENSP00000012443,ENSP00000225792,ENSP00000236671,ENSP00000308405,ENSP00000385479,ENSP00000434024	CTSD,DDX5,H2AFV,H2AFX,HIST2H3A,PPP5C
HSA-1236978	Cross-presentation of soluble exogenous antigens (endosomes)	4	47	0.0086	ENSP00000216802,ENSP00000310129,ENSP00000364016,ENSP00000414359	PSMA1,PSMB8,PSMD2,PSME2
HSA-195721	Signaling by WNT	9	293	0.0086	ENSP00000216802,ENSP00000260402,ENSP00000308405,ENSP00000310129,ENSP00000348461,ENSP00000364016,ENSP00000385479,ENSP00000414359,ENSP00000434024	H2AFV,H2AFX,HIST2H3A,PLCB2,PSMA1,PSMB8,PSMD2,PSME2,RAC1
HSA-211733	Regulation of activated PAK-2p34 by proteasome mediated degradation	4	47	0.0086	ENSP00000216802,ENSP00000310129,ENSP00000364016,ENSP00000414359	PSMA1,PSMB8,PSMD2,PSME2
HSA-350562	Regulation of ornithine decarboxylase (ODC)	4	48	0.0086	ENSP00000216802,ENSP00000310129,ENSP00000364016,ENSP00000414359	PSMA1,PSMB8,PSMD2,PSME2
HSA-72203	Processing of Capped Intron-Containing Pre-mRNA	8	234	0.0086	ENSP00000225792,ENSP00000263697,ENSP00000283179,ENSP00000325376,ENSP00000352438,ENSP00000360532,ENSP00000362820,ENSP00000412566	CDC5L,DDX5,DNAJC8,HNRNPM,HNRNPU,PCBP2,SNRPB,SRSF3
HSA-5687128	MAPK6/MAPK4 signaling	5	86	0.0088	ENSP00000216802,ENSP00000310129,ENSP00000348461,ENSP00000364016,ENSP00000414359	PSMA1,PSMB8,PSMD2,PSME2,RAC1
HSA-169911	Regulation of Apoptosis	4	50	0.0089	ENSP00000216802,ENSP00000310129,ENSP00000364016,ENSP00000414359	PSMA1,PSMB8,PSMD2,PSME2
HSA-174113	SCF-beta-TrCP mediated degradation of Emi1	4	52	0.0089	ENSP00000216802,ENSP00000310129,ENSP00000364016,ENSP00000414359	PSMA1,PSMB8,PSMD2,PSME2
HSA-180534	Vpu mediated degradation of CD4	4	49	0.0089	ENSP00000216802,ENSP00000310129,ENSP00000364016,ENSP00000414359	PSMA1,PSMB8,PSMD2,PSME2
HSA-180585	Vif-mediated degradation of APOBEC3G	4	50	0.0089	ENSP00000216802,ENSP00000310129,ENSP00000364016,ENSP00000414359	PSMA1,PSMB8,PSMD2,PSME2
HSA-3214858	RMTs methylate histone arginines	4	49	0.0089	ENSP00000254480,ENSP00000308405,ENSP00000385479,ENSP00000434024	H2AFV,H2AFX,HIST2H3A,SMARCC1
HSA-349425	Autodegradation of the E3 ubiquitin ligase COP1	4	49	0.0089	ENSP00000216802,ENSP00000310129,ENSP00000364016,ENSP00000414359	PSMA1,PSMB8,PSMD2,PSME2
HSA-4086400	PCP/CE pathway	5	89	0.0089	ENSP00000216802,ENSP00000310129,ENSP00000348461,ENSP00000364016,ENSP00000414359	PSMA1,PSMB8,PSMD2,PSME2,RAC1
HSA-450408	AUF1 (hnRNP D0) binds and destabilizes mRNA	4	51	0.0089	ENSP00000216802,ENSP00000310129,ENSP00000364016,ENSP00000414359	PSMA1,PSMB8,PSMD2,PSME2
HSA-4641257	Degradation of AXIN	4	52	0.0089	ENSP00000216802,ENSP00000310129,ENSP00000364016,ENSP00000414359	PSMA1,PSMB8,PSMD2,PSME2
HSA-69229	Ubiquitin-dependent degradation of Cyclin D1	4	49	0.0089	ENSP00000216802,ENSP00000310129,ENSP00000364016,ENSP00000414359	PSMA1,PSMB8,PSMD2,PSME2
HSA-69601	Ubiquitin Mediated Degradation of Phosphorylated Cdc25A	4	50	0.0089	ENSP00000216802,ENSP00000310129,ENSP00000364016,ENSP00000414359	PSMA1,PSMB8,PSMD2,PSME2
HSA-69610	p53-Independent DNA Damage Response	4	50	0.0089	ENSP00000216802,ENSP00000310129,ENSP00000364016,ENSP00000414359	PSMA1,PSMB8,PSMD2,PSME2
HSA-69613	p53-Independent G1/S DNA damage checkpoint	4	50	0.0089	ENSP00000216802,ENSP00000310129,ENSP00000364016,ENSP00000414359	PSMA1,PSMB8,PSMD2,PSME2
HSA-75815	Ubiquitin-dependent degradation of Cyclin D	4	49	0.0089	ENSP00000216802,ENSP00000310129,ENSP00000364016,ENSP00000414359	PSMA1,PSMB8,PSMD2,PSME2
HSA-8854050	FBXL7 down-regulates AURKA during mitotic entry and in early mitosis	4	52	0.0089	ENSP00000216802,ENSP00000310129,ENSP00000364016,ENSP00000414359	PSMA1,PSMB8,PSMD2,PSME2
HSA-8941858	Regulation of RUNX3 expression and activity	4	51	0.0089	ENSP00000216802,ENSP00000310129,ENSP00000364016,ENSP00000414359	PSMA1,PSMB8,PSMD2,PSME2
HSA-9604323	Negative regulation of NOTCH4 signaling	4	50	0.0089	ENSP00000216802,ENSP00000310129,ENSP00000364016,ENSP00000414359	PSMA1,PSMB8,PSMD2,PSME2
HSA-5362768	Hh mutants that don't undergo autocatalytic processing are degraded by ERAD	4	53	0.009	ENSP00000216802,ENSP00000310129,ENSP00000364016,ENSP00000414359	PSMA1,PSMB8,PSMD2,PSME2
HSA-69541	Stabilization of p53	4	53	0.009	ENSP00000216802,ENSP00000310129,ENSP00000364016,ENSP00000414359	PSMA1,PSMB8,PSMD2,PSME2
HSA-3858494	Beta-catenin independent WNT signaling	6	140	0.0091	ENSP00000216802,ENSP00000260402,ENSP00000310129,ENSP00000348461,ENSP00000364016,ENSP00000414359	PLCB2,PSMA1,PSMB8,PSMD2,PSME2,RAC1
HSA-4641258	Degradation of DVL	4	54	0.0092	ENSP00000216802,ENSP00000310129,ENSP00000364016,ENSP00000414359	PSMA1,PSMB8,PSMD2,PSME2
HSA-157118	Signaling by NOTCH	7	197	0.01	ENSP00000216802,ENSP00000308405,ENSP00000310129,ENSP00000364016,ENSP00000385479,ENSP00000414359,ENSP00000434024	H2AFV,H2AFX,HIST2H3A,PSMA1,PSMB8,PSMD2,PSME2
HSA-201681	TCF dependent signaling in response to WNT	7	198	0.0102	ENSP00000216802,ENSP00000308405,ENSP00000310129,ENSP00000364016,ENSP00000385479,ENSP00000414359,ENSP00000434024	H2AFV,H2AFX,HIST2H3A,PSMA1,PSMB8,PSMD2,PSME2
HSA-5387390	Hh mutants abrogate ligand secretion	4	56	0.0102	ENSP00000216802,ENSP00000310129,ENSP00000364016,ENSP00000414359	PSMA1,PSMB8,PSMD2,PSME2
HSA-5676590	NIK-->noncanonical NF-kB signaling	4	56	0.0102	ENSP00000216802,ENSP00000310129,ENSP00000364016,ENSP00000414359	PSMA1,PSMB8,PSMD2,PSME2
HSA-68827	CDT1 association with the CDC6:ORC:origin complex	4	56	0.0102	ENSP00000216802,ENSP00000310129,ENSP00000364016,ENSP00000414359	PSMA1,PSMB8,PSMD2,PSME2
HSA-187577	SCF(Skp2)-mediated degradation of p27/p21	4	57	0.0103	ENSP00000216802,ENSP00000310129,ENSP00000364016,ENSP00000414359	PSMA1,PSMB8,PSMD2,PSME2
HSA-5607761	Dectin-1 mediated noncanonical NF-kB signaling	4	57	0.0103	ENSP00000216802,ENSP00000310129,ENSP00000364016,ENSP00000414359	PSMA1,PSMB8,PSMD2,PSME2
HSA-5610780	Degradation of GLI1 by the proteasome	4	57	0.0103	ENSP00000216802,ENSP00000310129,ENSP00000364016,ENSP00000414359	PSMA1,PSMB8,PSMD2,PSME2
HSA-5610783	Degradation of GLI2 by the proteasome	4	57	0.0103	ENSP00000216802,ENSP00000310129,ENSP00000364016,ENSP00000414359	PSMA1,PSMB8,PSMD2,PSME2
HSA-5610785	GLI3 is processed to GLI3R by the proteasome	4	57	0.0103	ENSP00000216802,ENSP00000310129,ENSP00000364016,ENSP00000414359	PSMA1,PSMB8,PSMD2,PSME2
HSA-5678895	Defective CFTR causes cystic fibrosis	4	58	0.0103	ENSP00000216802,ENSP00000310129,ENSP00000364016,ENSP00000414359	PSMA1,PSMB8,PSMD2,PSME2
HSA-174084	Autodegradation of Cdh1 by Cdh1:APC/C	4	59	0.0108	ENSP00000216802,ENSP00000310129,ENSP00000364016,ENSP00000414359	PSMA1,PSMB8,PSMD2,PSME2
HSA-6799990	Metal sequestration by antimicrobial proteins	2	6	0.0112	ENSP00000357722,ENSP00000357727	S100A8,S100A9
HSA-4608870	Asymmetric localization of PCP proteins	4	61	0.0119	ENSP00000216802,ENSP00000310129,ENSP00000364016,ENSP00000414359	PSMA1,PSMB8,PSMD2,PSME2
HSA-5358346	Hedgehog ligand biogenesis	4	61	0.0119	ENSP00000216802,ENSP00000310129,ENSP00000364016,ENSP00000414359	PSMA1,PSMB8,PSMD2,PSME2
HSA-1234176	Oxygen-dependent proline hydroxylation of Hypoxia-inducible Factor Alpha	4	62	0.0123	ENSP00000216802,ENSP00000310129,ENSP00000364016,ENSP00000414359	PSMA1,PSMB8,PSMD2,PSME2
HSA-5683057	MAPK family signaling cascades	8	273	0.0123	ENSP00000012443,ENSP00000216802,ENSP00000261405,ENSP00000310129,ENSP00000348461,ENSP00000364016,ENSP00000369375,ENSP00000414359	PPP5C,PSMA1,PSMB8,PSMD2,PSME2,RAC1,TEK,VWF
HSA-69563	p53-Dependent G1 DNA Damage Response	4	62	0.0123	ENSP00000216802,ENSP00000310129,ENSP00000364016,ENSP00000414359	PSMA1,PSMB8,PSMD2,PSME2
HSA-69580	p53-Dependent G1/S DNA damage checkpoint	4	62	0.0123	ENSP00000216802,ENSP00000310129,ENSP00000364016,ENSP00000414359	PSMA1,PSMB8,PSMD2,PSME2
HSA-174154	APC/C:Cdc20 mediated degradation of Securin	4	63	0.0125	ENSP00000216802,ENSP00000310129,ENSP00000364016,ENSP00000414359	PSMA1,PSMB8,PSMD2,PSME2
HSA-5625740	RHO GTPases activate PKNs	4	63	0.0125	ENSP00000308405,ENSP00000348461,ENSP00000385479,ENSP00000434024	H2AFV,H2AFX,HIST2H3A,RAC1
HSA-1169091	Activation of NF-kappaB in B cells	4	64	0.0129	ENSP00000216802,ENSP00000310129,ENSP00000364016,ENSP00000414359	PSMA1,PSMB8,PSMD2,PSME2
HSA-69615	G1/S DNA Damage Checkpoints	4	64	0.0129	ENSP00000216802,ENSP00000310129,ENSP00000364016,ENSP00000414359	PSMA1,PSMB8,PSMD2,PSME2
HSA-5658442	Regulation of RAS by GAPs	4	65	0.0134	ENSP00000216802,ENSP00000310129,ENSP00000364016,ENSP00000414359	PSMA1,PSMB8,PSMD2,PSME2
HSA-68867	Assembly of the pre-replicative complex	4	65	0.0134	ENSP00000216802,ENSP00000310129,ENSP00000364016,ENSP00000414359	PSMA1,PSMB8,PSMD2,PSME2
HSA-8948751	Regulation of PTEN stability and activity	4	66	0.0138	ENSP00000216802,ENSP00000310129,ENSP00000364016,ENSP00000414359	PSMA1,PSMB8,PSMD2,PSME2
HSA-162906	HIV Infection	7	224	0.0152	ENSP00000216802,ENSP00000310129,ENSP00000348461,ENSP00000352257,ENSP00000360671,ENSP00000364016,ENSP00000414359	PSMA1,PSMB8,PSMD2,PSME2,RAC1,SLC25A5,XRCC6
HSA-174178	APC/C:Cdh1 mediated degradation of Cdc20 and other APC/C:Cdh1 targeted proteins in late mitosis/early G1	4	68	0.0152	ENSP00000216802,ENSP00000310129,ENSP00000364016,ENSP00000414359	PSMA1,PSMB8,PSMD2,PSME2
HSA-174184	Cdc20:Phospho-APC/C mediated degradation of Cyclin A	4	68	0.0152	ENSP00000216802,ENSP00000310129,ENSP00000364016,ENSP00000414359	PSMA1,PSMB8,PSMD2,PSME2
HSA-179419	APC:Cdc20 mediated degradation of cell cycle proteins prior to satisfation of the cell cycle checkpoint	4	69	0.0152	ENSP00000216802,ENSP00000310129,ENSP00000364016,ENSP00000414359	PSMA1,PSMB8,PSMD2,PSME2
HSA-68949	Orc1 removal from chromatin	4	68	0.0152	ENSP00000216802,ENSP00000310129,ENSP00000364016,ENSP00000414359	PSMA1,PSMB8,PSMD2,PSME2
HSA-69017	CDK-mediated phosphorylation and removal of Cdc6	4	68	0.0152	ENSP00000216802,ENSP00000310129,ENSP00000364016,ENSP00000414359	PSMA1,PSMB8,PSMD2,PSME2
HSA-73728	RNA Polymerase I Promoter Opening	3	32	0.0152	ENSP00000308405,ENSP00000385479,ENSP00000434024	H2AFV,H2AFX,HIST2H3A
HSA-8939902	Regulation of RUNX2 expression and activity	4	68	0.0152	ENSP00000216802,ENSP00000310129,ENSP00000364016,ENSP00000414359	PSMA1,PSMB8,PSMD2,PSME2
HSA-9006931	Signaling by Nuclear Receptors	6	167	0.0152	ENSP00000012443,ENSP00000225792,ENSP00000236671,ENSP00000308405,ENSP00000385479,ENSP00000434024	CTSD,DDX5,H2AFV,H2AFX,HIST2H3A,PPP5C
HSA-5673001	RAF/MAP kinase cascade	7	229	0.0157	ENSP00000012443,ENSP00000216802,ENSP00000261405,ENSP00000310129,ENSP00000364016,ENSP00000369375,ENSP00000414359	PPP5C,PSMA1,PSMB8,PSMD2,PSME2,TEK,VWF
HSA-1234174	Regulation of Hypoxia-inducible Factor (HIF) by oxygen	4	71	0.016	ENSP00000216802,ENSP00000310129,ENSP00000364016,ENSP00000414359	PSMA1,PSMB8,PSMD2,PSME2
HSA-176409	APC/C:Cdc20 mediated degradation of mitotic proteins	4	71	0.016	ENSP00000216802,ENSP00000310129,ENSP00000364016,ENSP00000414359	PSMA1,PSMB8,PSMD2,PSME2
HSA-2262749	Cellular response to hypoxia	4	71	0.016	ENSP00000216802,ENSP00000310129,ENSP00000364016,ENSP00000414359	PSMA1,PSMB8,PSMD2,PSME2
HSA-5334118	DNA methylation	3	34	0.016	ENSP00000308405,ENSP00000385479,ENSP00000434024	H2AFV,H2AFX,HIST2H3A
HSA-9018519	Estrogen-dependent gene expression	5	118	0.016	ENSP00000225792,ENSP00000236671,ENSP00000308405,ENSP00000385479,ENSP00000434024	CTSD,DDX5,H2AFV,H2AFX,HIST2H3A
HSA-176814	Activation of APC/C and APC/C:Cdc20 mediated degradation of mitotic proteins	4	72	0.0161	ENSP00000216802,ENSP00000310129,ENSP00000364016,ENSP00000414359	PSMA1,PSMB8,PSMD2,PSME2
HSA-5250913	Positive epigenetic regulation of rRNA expression	4	73	0.0166	ENSP00000308405,ENSP00000349508,ENSP00000385479,ENSP00000434024	CHD4,H2AFV,H2AFX,HIST2H3A
HSA-5619084	ABC transporter disorders	4	73	0.0166	ENSP00000216802,ENSP00000310129,ENSP00000364016,ENSP00000414359	PSMA1,PSMB8,PSMD2,PSME2
HSA-5684996	MAPK1/MAPK3 signaling	7	234	0.0166	ENSP00000012443,ENSP00000216802,ENSP00000261405,ENSP00000310129,ENSP00000364016,ENSP00000369375,ENSP00000414359	PPP5C,PSMA1,PSMB8,PSMD2,PSME2,TEK,VWF
HSA-8852276	The role of GTSE1 in G2/M progression after G2 checkpoint	4	73	0.0166	ENSP00000216802,ENSP00000310129,ENSP00000364016,ENSP00000414359	PSMA1,PSMB8,PSMD2,PSME2
HSA-5625886	Activated PKN1 stimulates transcription of AR (androgen receptor) regulated genes KLK2 and KLK3	3	36	0.0177	ENSP00000308405,ENSP00000385479,ENSP00000434024	H2AFV,H2AFX,HIST2H3A
HSA-176408	Regulation of APC/C activators between G1/S and early anaphase	4	76	0.0185	ENSP00000216802,ENSP00000310129,ENSP00000364016,ENSP00000414359	PSMA1,PSMB8,PSMD2,PSME2
HSA-2129379	Molecules associated with elastic fibres	3	37	0.0187	ENSP00000331544,ENSP00000379350,ENSP00000386043	FBLN1,ITGB1,LTBP1
HSA-427359	SIRT1 negatively regulates rRNA expression	3	37	0.0187	ENSP00000308405,ENSP00000385479,ENSP00000434024	H2AFV,H2AFX,HIST2H3A
HSA-2454202	Fc epsilon receptor (FCERI) signaling	5	126	0.0188	ENSP00000216802,ENSP00000310129,ENSP00000348461,ENSP00000364016,ENSP00000414359	PSMA1,PSMB8,PSMD2,PSME2,RAC1
HSA-73854	RNA Polymerase I Promoter Clearance	4	77	0.0188	ENSP00000308405,ENSP00000349508,ENSP00000385479,ENSP00000434024	CHD4,H2AFV,H2AFX,HIST2H3A
HSA-1168372	Downstream signaling events of B Cell Receptor (BCR)	4	78	0.0194	ENSP00000216802,ENSP00000310129,ENSP00000364016,ENSP00000414359	PSMA1,PSMB8,PSMD2,PSME2
HSA-9013694	Signaling by NOTCH4	4	78	0.0194	ENSP00000216802,ENSP00000310129,ENSP00000364016,ENSP00000414359	PSMA1,PSMB8,PSMD2,PSME2
HSA-195253	Degradation of beta-catenin by the destruction complex	4	79	0.0199	ENSP00000216802,ENSP00000310129,ENSP00000364016,ENSP00000414359	PSMA1,PSMB8,PSMD2,PSME2
HSA-2871837	FCERI mediated NF-kB activation	4	79	0.0199	ENSP00000216802,ENSP00000310129,ENSP00000364016,ENSP00000414359	PSMA1,PSMB8,PSMD2,PSME2
HSA-73864	RNA Polymerase I Transcription	4	79	0.0199	ENSP00000308405,ENSP00000349508,ENSP00000385479,ENSP00000434024	CHD4,H2AFV,H2AFX,HIST2H3A
HSA-1236974	ER-Phagosome pathway	4	80	0.0203	ENSP00000216802,ENSP00000310129,ENSP00000364016,ENSP00000414359	PSMA1,PSMB8,PSMD2,PSME2
HSA-69202	Cyclin E associated events during G1/S transition	4	80	0.0203	ENSP00000216802,ENSP00000310129,ENSP00000364016,ENSP00000414359	PSMA1,PSMB8,PSMD2,PSME2
HSA-351202	Metabolism of polyamines	4	81	0.0209	ENSP00000216802,ENSP00000310129,ENSP00000364016,ENSP00000414359	PSMA1,PSMB8,PSMD2,PSME2
HSA-174143	APC/C-mediated degradation of cell cycle proteins	4	82	0.0216	ENSP00000216802,ENSP00000310129,ENSP00000364016,ENSP00000414359	PSMA1,PSMB8,PSMD2,PSME2
HSA-453276	Regulation of mitotic cell cycle	4	82	0.0216	ENSP00000216802,ENSP00000310129,ENSP00000364016,ENSP00000414359	PSMA1,PSMB8,PSMD2,PSME2
HSA-5632684	Hedgehog 'on' state	4	82	0.0216	ENSP00000216802,ENSP00000310129,ENSP00000364016,ENSP00000414359	PSMA1,PSMB8,PSMD2,PSME2
HSA-69002	DNA Replication Pre-Initiation	4	82	0.0216	ENSP00000216802,ENSP00000310129,ENSP00000364016,ENSP00000414359	PSMA1,PSMB8,PSMD2,PSME2
HSA-69656	Cyclin A:Cdk2-associated events at S phase entry	4	82	0.0216	ENSP00000216802,ENSP00000310129,ENSP00000364016,ENSP00000414359	PSMA1,PSMB8,PSMD2,PSME2
HSA-450531	Regulation of mRNA stability by proteins that bind AU-rich elements	4	83	0.0217	ENSP00000216802,ENSP00000310129,ENSP00000364016,ENSP00000414359	PSMA1,PSMB8,PSMD2,PSME2
HSA-6807070	PTEN Regulation	5	135	0.0223	ENSP00000216802,ENSP00000310129,ENSP00000349508,ENSP00000364016,ENSP00000414359	CHD4,PSMA1,PSMB8,PSMD2,PSME2
HSA-212300	PRC2 methylates histones and DNA	3	42	0.0226	ENSP00000308405,ENSP00000385479,ENSP00000434024	H2AFV,H2AFX,HIST2H3A
HSA-2299718	Condensation of Prophase Chromosomes	3	42	0.0226	ENSP00000308405,ENSP00000385479,ENSP00000434024	H2AFV,H2AFX,HIST2H3A
HSA-69052	Switching of origins to a post-replicative state	4	86	0.0238	ENSP00000216802,ENSP00000310129,ENSP00000364016,ENSP00000414359	PSMA1,PSMB8,PSMD2,PSME2
HSA-1566948	Elastic fibre formation	3	44	0.0251	ENSP00000331544,ENSP00000379350,ENSP00000386043	FBLN1,ITGB1,LTBP1
HSA-5619115	Disorders of transmembrane transporters	5	141	0.0257	ENSP00000216802,ENSP00000310129,ENSP00000364016,ENSP00000402103,ENSP00000414359	HK1,PSMA1,PSMB8,PSMD2,PSME2
HSA-202424	Downstream TCR signaling	4	89	0.0262	ENSP00000216802,ENSP00000310129,ENSP00000364016,ENSP00000414359	PSMA1,PSMB8,PSMD2,PSME2
HSA-5617472	Activation of anterior HOX genes in hindbrain development during early embryogenesis	4	91	0.028	ENSP00000264010,ENSP00000308405,ENSP00000385479,ENSP00000434024	CTCF,H2AFV,H2AFX,HIST2H3A
HSA-5619507	Activation of HOX genes during differentiation	4	91	0.028	ENSP00000264010,ENSP00000308405,ENSP00000385479,ENSP00000434024	CTCF,H2AFV,H2AFX,HIST2H3A
HSA-8878159	Transcriptional regulation by RUNX3	4	91	0.028	ENSP00000216802,ENSP00000310129,ENSP00000364016,ENSP00000414359	PSMA1,PSMB8,PSMD2,PSME2
HSA-5689603	UCH proteinases	4	93	0.0295	ENSP00000216802,ENSP00000310129,ENSP00000364016,ENSP00000414359	PSMA1,PSMB8,PSMD2,PSME2
HSA-69481	G2/M Checkpoints	5	148	0.0299	ENSP00000216802,ENSP00000310129,ENSP00000364016,ENSP00000414359,ENSP00000434024	H2AFX,PSMA1,PSMB8,PSMD2,PSME2
HSA-5607764	CLEC7A (Dectin-1) signaling	4	94	0.03	ENSP00000216802,ENSP00000310129,ENSP00000364016,ENSP00000414359	PSMA1,PSMB8,PSMD2,PSME2
HSA-71336	Pentose phosphate pathway	2	15	0.03	ENSP00000270776,ENSP00000361512	PGD,PRPS1
HSA-75892	Platelet Adhesion to exposed collagen	2	15	0.03	ENSP00000261405,ENSP00000379350	ITGB1,VWF
HSA-6811440	Retrograde transport at the Trans-Golgi-Network	3	49	0.0309	ENSP00000221957,ENSP00000263354,ENSP00000285208	NAPA,PLIN3,RAB6B
HSA-1236975	Antigen processing-Cross presentation	4	96	0.0316	ENSP00000216802,ENSP00000310129,ENSP00000364016,ENSP00000414359	PSMA1,PSMB8,PSMD2,PSME2
HSA-5668541	TNFR2 non-canonical NF-kB pathway	4	96	0.0316	ENSP00000216802,ENSP00000310129,ENSP00000364016,ENSP00000414359	PSMA1,PSMB8,PSMD2,PSME2
HSA-9020702	Interleukin-1 signaling	4	98	0.0334	ENSP00000216802,ENSP00000310129,ENSP00000364016,ENSP00000414359	PSMA1,PSMB8,PSMD2,PSME2
HSA-382556	ABC-family proteins mediated transport	4	100	0.0355	ENSP00000216802,ENSP00000310129,ENSP00000364016,ENSP00000414359	PSMA1,PSMB8,PSMD2,PSME2
HSA-5663202	Diseases of signal transduction	8	360	0.0356	ENSP00000216802,ENSP00000261405,ENSP00000310129,ENSP00000346762,ENSP00000348461,ENSP00000364016,ENSP00000375857,ENSP00000414359	LRRFIP1,PSMA1,PSMB8,PSMD2,PSME2,RAC1,SND1,VWF
HSA-3928664	Ephrin signaling	2	18	0.039	ENSP00000348461,ENSP00000364893	ARHGEF7,RAC1
HSA-109581	Apoptosis	5	162	0.0398	ENSP00000216802,ENSP00000310129,ENSP00000339566,ENSP00000364016,ENSP00000414359	HIST1H1C,PSMA1,PSMB8,PSMD2,PSME2
HSA-912446	Meiotic recombination	3	55	0.0398	ENSP00000308405,ENSP00000385479,ENSP00000434024	H2AFV,H2AFX,HIST2H3A
HSA-5357801	Programmed Cell Death	5	165	0.0421	ENSP00000216802,ENSP00000310129,ENSP00000339566,ENSP00000364016,ENSP00000414359	HIST1H1C,PSMA1,PSMB8,PSMD2,PSME2
HSA-5686938	Regulation of TLR by endogenous ligand	2	19	0.0421	ENSP00000357722,ENSP00000357727	S100A8,S100A9
HSA-983705	Signaling by the B Cell Receptor (BCR)	4	107	0.0424	ENSP00000216802,ENSP00000310129,ENSP00000364016,ENSP00000414359	PSMA1,PSMB8,PSMD2,PSME2
HSA-5610787	Hedgehog 'off' state	4	108	0.0435	ENSP00000216802,ENSP00000310129,ENSP00000364016,ENSP00000414359	PSMA1,PSMB8,PSMD2,PSME2
HSA-202403	TCR signaling	4	109	0.0441	ENSP00000216802,ENSP00000310129,ENSP00000364016,ENSP00000414359	PSMA1,PSMB8,PSMD2,PSME2
HSA-5250924	B-WICH complex positively regulates rRNA expression	3	58	0.0441	ENSP00000308405,ENSP00000385479,ENSP00000434024	H2AFV,H2AFX,HIST2H3A
HSA-73777	RNA Polymerase I Chain Elongation	3	58	0.0441	ENSP00000308405,ENSP00000385479,ENSP00000434024	H2AFV,H2AFX,HIST2H3A
HSA-445144	Signal transduction by L1	2	20	0.0442	ENSP00000348461,ENSP00000379350	ITGB1,RAC1
HSA-201722	Formation of the beta-catenin:TCF transactivating complex	3	60	0.047	ENSP00000308405,ENSP00000385479,ENSP00000434024	H2AFV,H2AFX,HIST2H3A
HSA-6790901	rRNA modification in the nucleus and cytosol	3	60	0.047	ENSP00000221801,ENSP00000339095,ENSP00000369757	FBL,RPS6,RPS7
HSA-2559586	DNA Damage/Telomere Stress Induced Senescence	3	61	0.0485	ENSP00000308405,ENSP00000339566,ENSP00000434024	H2AFV,H2AFX,HIST1H1C
HSA-1257604	PIP3 activates AKT signaling	6	242	0.0495	ENSP00000216802,ENSP00000310129,ENSP00000348461,ENSP00000349508,ENSP00000364016,ENSP00000414359	CHD4,PSMA1,PSMB8,PSMD2,PSME2,RAC1
HSA-69239	Synthesis of DNA	4	114	0.0495	ENSP00000216802,ENSP00000310129,ENSP00000364016,ENSP00000414359	PSMA1,PSMB8,PSMD2,PSME2
HSA-1912408	Pre-NOTCH Transcription and Translation	3	62	0.0497	ENSP00000308405,ENSP00000385479,ENSP00000434024	H2AFV,H2AFX,HIST2H3A

## Sheet: GO BP1
#term ID	term description	observed gene count	background gene count	false discovery rate	matching proteins in your network (IDs)	matching proteins in your network (labels)
GO:0044281	small molecule metabolic process	10	1779	1.73e-07	ENSP00000168216,ENSP00000221418,ENSP00000270776,ENSP00000290299,ENSP00000357535,ENSP00000364649,ENSP00000378669,ENSP00000379386,ENSP00000402103,ENSP00000439012	ALDOA,ATP5O,DBI,ECH1,ECHS1,HK1,HSD17B10,LDHB,PGD,SDHB
GO:0019752	carboxylic acid metabolic process	8	854	4.32e-07	ENSP00000168216,ENSP00000221418,ENSP00000270776,ENSP00000357535,ENSP00000364649,ENSP00000378669,ENSP00000379386,ENSP00000402103	ALDOA,ECH1,ECHS1,HK1,HSD17B10,LDHB,PGD,SDHB
GO:0055114	oxidation-reduction process	8	923	5.3e-07	ENSP00000168216,ENSP00000221418,ENSP00000270776,ENSP00000357535,ENSP00000364649,ENSP00000378669,ENSP00000379386,ENSP00000402103	ALDOA,ECH1,ECHS1,HK1,HSD17B10,LDHB,PGD,SDHB
GO:0032787	monocarboxylic acid metabolic process	6	477	6.53e-06	ENSP00000221418,ENSP00000270776,ENSP00000357535,ENSP00000378669,ENSP00000379386,ENSP00000402103	ALDOA,ECH1,ECHS1,HK1,LDHB,PGD
GO:0006732	coenzyme metabolic process	5	297	1.69e-05	ENSP00000270776,ENSP00000378669,ENSP00000379386,ENSP00000402103,ENSP00000439012	ALDOA,DBI,HK1,LDHB,PGD
GO:0009117	nucleotide metabolic process	6	576	1.69e-05	ENSP00000270776,ENSP00000290299,ENSP00000378669,ENSP00000379386,ENSP00000402103,ENSP00000439012	ALDOA,ATP5O,DBI,HK1,LDHB,PGD
GO:0046496	nicotinamide nucleotide metabolic process	4	107	1.69e-05	ENSP00000270776,ENSP00000378669,ENSP00000379386,ENSP00000402103	ALDOA,HK1,LDHB,PGD
GO:0044282	small molecule catabolic process	5	388	3.82e-05	ENSP00000168216,ENSP00000221418,ENSP00000357535,ENSP00000378669,ENSP00000402103	ALDOA,ECH1,ECHS1,HK1,HSD17B10
GO:0019693	ribose phosphate metabolic process	5	455	7.76e-05	ENSP00000270776,ENSP00000290299,ENSP00000378669,ENSP00000402103,ENSP00000439012	ALDOA,ATP5O,DBI,HK1,PGD
GO:0006090	pyruvate metabolic process	3	66	0.00016	ENSP00000378669,ENSP00000379386,ENSP00000402103	ALDOA,HK1,LDHB
GO:0019674	NAD metabolic process	3	66	0.00016	ENSP00000378669,ENSP00000379386,ENSP00000402103	ALDOA,HK1,LDHB
GO:0006754	ATP biosynthetic process	3	75	0.0002	ENSP00000290299,ENSP00000378669,ENSP00000402103	ALDOA,ATP5O,HK1
GO:0009168	purine ribonucleoside monophosphate biosynthetic process	3	98	0.00037	ENSP00000290299,ENSP00000378669,ENSP00000402103	ALDOA,ATP5O,HK1
GO:0006091	generation of precursor metabolites and energy	4	388	0.00067	ENSP00000290299,ENSP00000364649,ENSP00000378669,ENSP00000402103	ALDOA,ATP5O,HK1,SDHB
GO:0009150	purine ribonucleotide metabolic process	4	425	0.00092	ENSP00000290299,ENSP00000378669,ENSP00000402103,ENSP00000439012	ALDOA,ATP5O,DBI,HK1
GO:0051156	glucose 6-phosphate metabolic process	2	21	0.00097	ENSP00000270776,ENSP00000402103	HK1,PGD
GO:0005975	carbohydrate metabolic process	4	457	0.0011	ENSP00000270776,ENSP00000378669,ENSP00000379386,ENSP00000402103	ALDOA,HK1,LDHB,PGD
GO:0006735	NADH regeneration	2	25	0.0012	ENSP00000378669,ENSP00000402103	ALDOA,HK1
GO:0061621	canonical glycolysis	2	25	0.0012	ENSP00000378669,ENSP00000402103	ALDOA,HK1
GO:0061718	glucose catabolic process to pyruvate	2	25	0.0012	ENSP00000378669,ENSP00000402103	ALDOA,HK1
GO:0046034	ATP metabolic process	3	190	0.0014	ENSP00000290299,ENSP00000378669,ENSP00000402103	ALDOA,ATP5O,HK1
GO:0005996	monosaccharide metabolic process	3	198	0.0016	ENSP00000270776,ENSP00000378669,ENSP00000402103	ALDOA,HK1,PGD
GO:0006757	ATP generation from ADP	2	39	0.0019	ENSP00000378669,ENSP00000402103	ALDOA,HK1
GO:0009167	purine ribonucleoside monophosphate metabolic process	3	230	0.0019	ENSP00000290299,ENSP00000378669,ENSP00000402103	ALDOA,ATP5O,HK1
GO:0017144	drug metabolic process	4	622	0.002	ENSP00000290299,ENSP00000364649,ENSP00000378669,ENSP00000402103	ALDOA,ATP5O,HK1,SDHB
GO:0042866	pyruvate biosynthetic process	2	42	0.002	ENSP00000378669,ENSP00000402103	ALDOA,HK1
GO:0046395	carboxylic acid catabolic process	3	237	0.002	ENSP00000168216,ENSP00000221418,ENSP00000357535	ECH1,ECHS1,HSD17B10
GO:0009435	NAD biosynthetic process	2	51	0.0025	ENSP00000378669,ENSP00000402103	ALDOA,HK1
GO:0046364	monosaccharide biosynthetic process	2	55	0.0027	ENSP00000270776,ENSP00000378669	ALDOA,PGD
GO:0006635	fatty acid beta-oxidation	2	56	0.0028	ENSP00000221418,ENSP00000357535	ECH1,ECHS1
GO:0051289	protein homotetramerization	2	78	0.0044	ENSP00000168216,ENSP00000378669	ALDOA,HSD17B10
GO:1901575	organic substance catabolic process	5	1609	0.0055	ENSP00000168216,ENSP00000221418,ENSP00000357535,ENSP00000378669,ENSP00000402103	ALDOA,ECH1,ECHS1,HK1,HSD17B10
GO:0044248	cellular catabolic process	5	1646	0.0061	ENSP00000168216,ENSP00000221418,ENSP00000357535,ENSP00000378669,ENSP00000402103	ALDOA,ECH1,ECHS1,HK1,HSD17B10
GO:0009166	nucleotide catabolic process	2	101	0.0069	ENSP00000378669,ENSP00000402103	ALDOA,HK1
GO:0007005	mitochondrion organization	3	424	0.007	ENSP00000168216,ENSP00000290299,ENSP00000360671	ATP5O,HSD17B10,SLC25A5
GO:0006006	glucose metabolic process	2	113	0.0082	ENSP00000378669,ENSP00000402103	ALDOA,HK1
GO:0007006	mitochondrial membrane organization	2	123	0.0094	ENSP00000290299,ENSP00000360671	ATP5O,SLC25A5
GO:0044237	cellular metabolic process	10	8797	0.0096	ENSP00000168216,ENSP00000221418,ENSP00000270776,ENSP00000290299,ENSP00000357535,ENSP00000364649,ENSP00000378669,ENSP00000379386,ENSP00000402103,ENSP00000439012	ALDOA,ATP5O,DBI,ECH1,ECHS1,HK1,HSD17B10,LDHB,PGD,SDHB
GO:0044238	primary metabolic process	10	8808	0.0096	ENSP00000168216,ENSP00000221418,ENSP00000270776,ENSP00000290299,ENSP00000357535,ENSP00000364649,ENSP00000378669,ENSP00000379386,ENSP00000402103,ENSP00000439012	ALDOA,ATP5O,DBI,ECH1,ECHS1,HK1,HSD17B10,LDHB,PGD,SDHB
GO:0044262	cellular carbohydrate metabolic process	2	144	0.0123	ENSP00000270776,ENSP00000402103	HK1,PGD
GO:0071704	organic substance metabolic process	10	9135	0.013	ENSP00000168216,ENSP00000221418,ENSP00000270776,ENSP00000290299,ENSP00000357535,ENSP00000364649,ENSP00000378669,ENSP00000379386,ENSP00000402103,ENSP00000439012	ALDOA,ATP5O,DBI,ECH1,ECHS1,HK1,HSD17B10,LDHB,PGD,SDHB
GO:0006629	lipid metabolic process	4	1192	0.0132	ENSP00000168216,ENSP00000221418,ENSP00000357535,ENSP00000439012	DBI,ECH1,ECHS1,HSD17B10
GO:0044283	small molecule biosynthetic process	3	569	0.0137	ENSP00000270776,ENSP00000378669,ENSP00000402103	ALDOA,HK1,PGD
GO:0006139	nucleobase-containing compound metabolic process	7	4551	0.0185	ENSP00000168216,ENSP00000270776,ENSP00000290299,ENSP00000378669,ENSP00000379386,ENSP00000402103,ENSP00000439012	ALDOA,ATP5O,DBI,HK1,HSD17B10,LDHB,PGD
GO:0006839	mitochondrial transport	2	223	0.0243	ENSP00000290299,ENSP00000360671	ATP5O,SLC25A5
GO:1901564	organonitrogen compound metabolic process	7	5281	0.0406	ENSP00000168216,ENSP00000270776,ENSP00000290299,ENSP00000378669,ENSP00000379386,ENSP00000402103,ENSP00000439012	ALDOA,ATP5O,DBI,HK1,HSD17B10,LDHB,PGD
GO:0044255	cellular lipid metabolic process	3	946	0.0464	ENSP00000221418,ENSP00000357535,ENSP00000439012	DBI,ECH1,ECHS1

## Sheet: GO CC1
#term ID	term description	observed gene count	background gene count	false discovery rate	matching proteins in your network (IDs)	matching proteins in your network (labels)
GO:0005739	mitochondrion	7	1531	0.00058	ENSP00000168216,ENSP00000221418,ENSP00000290299,ENSP00000357535,ENSP00000360671,ENSP00000364649,ENSP00000402103	ATP5O,ECH1,ECHS1,HK1,HSD17B10,SDHB,SLC25A5
GO:0044429	mitochondrial part	6	1015	0.00058	ENSP00000168216,ENSP00000290299,ENSP00000357535,ENSP00000360671,ENSP00000364649,ENSP00000402103	ATP5O,ECHS1,HK1,HSD17B10,SDHB,SLC25A5
GO:0031966	mitochondrial membrane	4	679	0.013	ENSP00000290299,ENSP00000360671,ENSP00000364649,ENSP00000402103	ATP5O,HK1,SDHB,SLC25A5
GO:0044444	cytoplasmic part	11	9377	0.013	ENSP00000168216,ENSP00000221418,ENSP00000270776,ENSP00000290299,ENSP00000357535,ENSP00000360671,ENSP00000364649,ENSP00000378669,ENSP00000379386,ENSP00000402103,ENSP00000439012	ALDOA,ATP5O,DBI,ECH1,ECHS1,HK1,HSD17B10,LDHB,PGD,SDHB,SLC25A5
GO:0098798	mitochondrial protein complex	3	251	0.013	ENSP00000168216,ENSP00000290299,ENSP00000364649	ATP5O,HSD17B10,SDHB
GO:0005743	mitochondrial inner membrane	3	456	0.0333	ENSP00000290299,ENSP00000360671,ENSP00000364649	ATP5O,SDHB,SLC25A5
GO:0005759	mitochondrial matrix	3	463	0.0333	ENSP00000168216,ENSP00000357535,ENSP00000360671	ECHS1,HSD17B10,SLC25A5
GO:0043209	myelin sheath	2	157	0.0333	ENSP00000360671,ENSP00000379386	LDHB,SLC25A5
GO:0098800	inner mitochondrial membrane protein complex	2	128	0.0333	ENSP00000290299,ENSP00000364649	ATP5O,SDHB

## Sheet: enrichment.PMID1
#term ID	term description	observed gene count	background gene count	false discovery rate	matching proteins in your network (IDs)	matching proteins in your network (labels)
PMID:30430110	(2018) High Expression of Glycolytic Genes in Cirrhosis Correlates With the Risk of Developing Liver Cancer.	5	36	3.26e-07	ENSP00000270776,ENSP00000364649,ENSP00000378669,ENSP00000379386,ENSP00000402103	ALDOA,HK1,LDHB,PGD,SDHB
PMID:27282387	(2016) Metabolic reprogramming during neuronal differentiation from aerobic glycolysis to neuronal oxidative phosphorylation.	5	60	1.78e-06	ENSP00000290299,ENSP00000364649,ENSP00000378669,ENSP00000379386,ENSP00000402103	ALDOA,ATP5O,HK1,LDHB,SDHB
PMID:26885861	(2016) The Proteomic Landscape of Human Ex Vivo Regulatory and Conventional T Cells Reveals Specific Metabolic Requirements.	5	80	4.7e-06	ENSP00000168216,ENSP00000357535,ENSP00000378669,ENSP00000379386,ENSP00000402103	ALDOA,ECHS1,HK1,HSD17B10,LDHB
PMID:23796563	(2013) Inhibition of AMPK and Krebs cycle gene expression drives metabolic remodeling of Pten-deficient preneoplastic thyroid cells.	4	37	3.07e-05	ENSP00000364649,ENSP00000378669,ENSP00000379386,ENSP00000402103	ALDOA,HK1,LDHB,SDHB
PMID:25415228	(2014) Mitochondria as new therapeutic targets for eradicating cancer stem cells: Quantitative proteomics and functional validation via MCT12 inhibition.	4	43	4.32e-05	ENSP00000168216,ENSP00000290299,ENSP00000357535,ENSP00000360671	ATP5O,ECHS1,HSD17B10,SLC25A5
PMID:25241892	(2015) Deletion of Pim kinases elevates the cellular levels of reactive oxygen species and sensitizes to K-Ras-induced cell killing.	4	46	4.64e-05	ENSP00000357535,ENSP00000364649,ENSP00000378669,ENSP00000402103	ALDOA,ECHS1,HK1,SDHB
PMID:30716628	(2019) H2S inhalation-induced energy metabolism disturbance is involved in LPS mediated hepatocyte apoptosis through mitochondrial pathway.	3	7	5.13e-05	ENSP00000364649,ENSP00000379386,ENSP00000402103	HK1,LDHB,SDHB
PMID:21067278	(2011) Effect of carbon nanoparticles on renal epithelial cell structure, barrier function, and protein expression.	4	55	6.17e-05	ENSP00000168216,ENSP00000290299,ENSP00000378669,ENSP00000402103	ALDOA,ATP5O,HK1,HSD17B10
PMID:27634447	(2016) Reprogramming glucose metabolism in cancer: can it be exploited for cancer therapy?	4	55	6.17e-05	ENSP00000270776,ENSP00000378669,ENSP00000379386,ENSP00000402103	ALDOA,HK1,LDHB,PGD
PMID:29986527	(2018) Molecular Cloning and Expression Analysis of Lactate Dehydrogenase from the Oriental River Prawn Macrobrachium nipponense in Response to Hypoxia.	3	8	6.17e-05	ENSP00000364649,ENSP00000379386,ENSP00000402103	HK1,LDHB,SDHB
PMID:6712609	(1984) Regional enzyme development in rat brain. Enzymes associated with glucose utilization.	3	10	7.77e-05	ENSP00000378669,ENSP00000379386,ENSP00000402103	ALDOA,HK1,LDHB
PMID:9286685	(1997) Linkage groups of protein-coding genes in western palearctic water frogs reveal extensive evolutionary conservation.	3	12	0.00011	ENSP00000270776,ENSP00000379386,ENSP00000402103	HK1,LDHB,PGD
PMID:26583150	(2015) Transcriptional Changes Associated with Long-Term Left Ventricle Volume Overload in Rats: Impact on Enzymes Related to Myocardial Energy Metabolism.	3	13	0.00013	ENSP00000221418,ENSP00000357535,ENSP00000402103	ECH1,ECHS1,HK1
PMID:27888634	(2016) Targeting protein kinase CK2 suppresses bladder cancer cell survival via the glucose metabolic pathway.	3	13	0.00013	ENSP00000270776,ENSP00000379386,ENSP00000402103	HK1,LDHB,PGD
PMID:6460851	(1981) Energy-metabolizing enzymes in brain regions of adult and aging rats.	3	14	0.00014	ENSP00000378669,ENSP00000379386,ENSP00000402103	ALDOA,HK1,LDHB
PMID:23342984	(2013) Role of aerobic glycolysis in genetically engineered mouse models of cancer.	3	16	0.00018	ENSP00000378669,ENSP00000379386,ENSP00000402103	ALDOA,HK1,LDHB
PMID:30895174	(2019) A Pathogen and a Non-pathogen Spotted Fever Group Rickettsia Trigger Differential Proteome Signatures in Macrophages.	4	90	0.00021	ENSP00000221418,ENSP00000360671,ENSP00000364649,ENSP00000379386	ECH1,LDHB,SDHB,SLC25A5
PMID:30972416	(2019) Hierarchical clustering reveals unique features in the diel dynamics of metabolites in the CAM orchid Phalaenopsis.	3	18	0.00022	ENSP00000270776,ENSP00000379386,ENSP00000402103	HK1,LDHB,PGD
PMID:30914704	(2019) Mitochondrial function in immature bovine oocytes is improved by an increase of cellular cyclic AMP.	4	97	0.00024	ENSP00000357535,ENSP00000378669,ENSP00000379386,ENSP00000402103	ALDOA,ECHS1,HK1,LDHB
PMID:31632098	(2019) Antagonistic Effects Of Baicalin On Mycoplasma gallisepticum-Induced Inflammation And Apoptosis By Restoring Energy Metabolism In The Chicken Lungs.	3	19	0.00024	ENSP00000364649,ENSP00000379386,ENSP00000402103	HK1,LDHB,SDHB
PMID:20585107	(2010) Meta-analysis of genome-wide gene expression differences in onset and maintenance phases of genetic hypertension.	3	20	0.00025	ENSP00000221418,ENSP00000290299,ENSP00000379386	ATP5O,ECH1,LDHB
PMID:21728379	(2011) The fastedfed mouse metabolic acetylome: N6-acetylation differences suggest acetylation coordinates organ-specific fuel switching.	3	22	0.0003	ENSP00000221418,ENSP00000290299,ENSP00000378669	ALDOA,ATP5O,ECH1
PMID:26740741	(2015) Interplay Between Metabolism and Oncogenic Process: Role of microRNAs.	4	105	0.0003	ENSP00000270776,ENSP00000378669,ENSP00000379386,ENSP00000402103	ALDOA,HK1,LDHB,PGD
PMID:28955040	(2017) Proteomic footprint of myocardial ischemiareperfusion injury: Longitudinal study of the at-risk and remote regions in the pig model.	3	22	0.0003	ENSP00000290299,ENSP00000360671,ENSP00000364649	ATP5O,SDHB,SLC25A5
PMID:23603840	(2013) Dysfunctional oxidative phosphorylation makes malignant melanoma cells addicted to glycolysis driven by the (V600E)BRAF oncogene.	3	23	0.00031	ENSP00000270776,ENSP00000378669,ENSP00000402103	ALDOA,HK1,PGD
PMID:23555795	(2013) Ovariectomy induces a shift in fuel availability and metabolism in the hippocampus of the female transgenic model of familial Alzheimer's.	3	24	0.00033	ENSP00000364649,ENSP00000379386,ENSP00000402103	HK1,LDHB,SDHB
PMID:30733653	(2019) Comparative Analysis of Mitochondrial Proteome Reveals the Mechanism of Enhanced Ram Sperm Motility Induced by Carbon Ion Radiation After In Vitro Liquid Storage.	3	25	0.00036	ENSP00000168216,ENSP00000357535,ENSP00000364649	ECHS1,HSD17B10,SDHB
PMID:18221507	(2008) Development of a human mitochondrial oligonucleotide microarray (h-MitoArray) and gene expression analysis of fibroblast cell lines from 13 patients with isolated F1Fo ATP synthase deficiency.	4	118	0.00037	ENSP00000221418,ENSP00000290299,ENSP00000357535,ENSP00000378669	ALDOA,ATP5O,ECH1,ECHS1
PMID:22056798	(2012) DIGE and iTRAQ as biomarker discovery tools in aquatic toxicology.	3	28	0.00046	ENSP00000221418,ENSP00000379386,ENSP00000439012	DBI,ECH1,LDHB
PMID:23202129	(2013) MCT1-mediated transport of a toxic molecule is an effective strategy for targeting glycolytic tumors.	3	30	0.00054	ENSP00000378669,ENSP00000379386,ENSP00000402103	ALDOA,HK1,LDHB
PMID:29094074	(2017) Progressive resistance training in head and neck cancer patients undergoing concomitant chemoradiotherapy.	3	30	0.00054	ENSP00000270776,ENSP00000378669,ENSP00000402103	ALDOA,HK1,PGD
PMID:22859959	(2012) Warburg effect's manifestation in aggressive pheochromocytomas and paragangliomas: insights from a mouse cell model applied to human tumor tissue.	3	31	0.00056	ENSP00000364649,ENSP00000379386,ENSP00000402103	HK1,LDHB,SDHB
PMID:9183713	(1997) Activities of enzymes of carbohydrate and energy metabolism of the spores of the microsporidian, Nosema grylli.	3	32	0.00059	ENSP00000378669,ENSP00000379386,ENSP00000402103	ALDOA,HK1,LDHB
PMID:17112383	(2006) Effects of the presence of ColE1 plasmid DNA in Escherichia coli on the host cell metabolism.	3	33	0.00062	ENSP00000270776,ENSP00000378669,ENSP00000402103	ALDOA,HK1,PGD
PMID:25644309	(2015) Warburg effect regulated by amphiregulin in the development of colorectal cancer.	3	33	0.00062	ENSP00000364649,ENSP00000379386,ENSP00000402103	HK1,LDHB,SDHB
PMID:28217095	(2017) Endogenous Protein Interactome of Human UDP-Glucuronosyltransferases Exposed by Untargeted Proteomics.	3	33	0.00062	ENSP00000221418,ENSP00000357535,ENSP00000360671	ECH1,ECHS1,SLC25A5
PMID:28245921	(2017) A Gradient of Glycolytic Activity Coordinates FGF and Wnt Signaling during Elongation of the Body Axis in Amniote Embryos.	3	35	0.00068	ENSP00000378669,ENSP00000379386,ENSP00000402103	ALDOA,HK1,LDHB
PMID:25500817	(2014) Transcriptome profiles of the protoscoleces of Echinococcus granulosus reveal that excretory-secretory products are essential to metabolic adaptation.	3	36	0.00071	ENSP00000270776,ENSP00000378669,ENSP00000402103	ALDOA,HK1,PGD
PMID:26426115	(2015) Glycerol Production from Glucose and Fructose by 3T3-L1 Cells: A Mechanism of Adipocyte Defense from Excess Substrate.	3	37	0.00075	ENSP00000378669,ENSP00000379386,ENSP00000402103	ALDOA,HK1,LDHB
PMID:24792668	(2014) High-confidence glycosome proteome for procyclic form Trypanosoma brucei by epitope-tag organelle enrichment and SILAC proteomics.	3	38	0.00079	ENSP00000270776,ENSP00000402103,ENSP00000439012	DBI,HK1,PGD
PMID:28467784	(2017) In silico gene expression analysis reveals glycolysis and acetate anaplerosis in IDH1 wild-type glioma and lactate and glutamate anaplerosis in IDH1-mutated glioma.	3	38	0.00079	ENSP00000364649,ENSP00000379386,ENSP00000402103	HK1,LDHB,SDHB
PMID:28890694	(2017) Erythrocytes as Potential Link between Diabetes and Alzheimer's Disease.	3	38	0.00079	ENSP00000270776,ENSP00000379386,ENSP00000402103	HK1,LDHB,PGD
PMID:29845793	(2018) Metabolic Signature of Pluripotent Stem Cells.	3	39	0.00079	ENSP00000364649,ENSP00000378669,ENSP00000402103	ALDOA,HK1,SDHB
PMID:30176945	(2018) Liver cancer cell lines distinctly mimic the metabolic gene expression pattern of the corresponding human tumours.	4	164	0.00085	ENSP00000270776,ENSP00000378669,ENSP00000379386,ENSP00000402103	ALDOA,HK1,LDHB,PGD
PMID:21843514	(2011) Valproic acid utilizes the isoleucine breakdown pathway for its complete beta-oxidation.	2	2	0.00087	ENSP00000168216,ENSP00000357535	ECHS1,HSD17B10
PMID:24351292	(2014) Metastasis suppressor KISS1 seems to reverse the Warburg effect by enhancing mitochondrial biogenesis.	3	41	0.00087	ENSP00000360671,ENSP00000379386,ENSP00000402103	HK1,LDHB,SLC25A5
PMID:6234985	(1984) Inhibition of 6-phosphogluconate dehydrogenase by glucose 1,6-diphosphate in human normal and malignant colon extracts.	2	2	0.00087	ENSP00000270776,ENSP00000402103	HK1,PGD
PMID:30197082	(2018) Extracellular Matrix Remodeling Regulates Glucose Metabolism through TXNIP Destabilization.	3	42	0.00088	ENSP00000378669,ENSP00000379386,ENSP00000402103	ALDOA,HK1,LDHB
PMID:28781589	(2017) Effect of everolimus on the glucose metabolic pathway in mouse skeletal muscle cells (C2C12).	3	43	0.00092	ENSP00000270776,ENSP00000378669,ENSP00000402103	ALDOA,HK1,PGD
PMID:29212306	(2018) Oncogene-Driven Metabolic Alterations in Cancer.	3	43	0.00092	ENSP00000270776,ENSP00000379386,ENSP00000402103	HK1,LDHB,PGD
PMID:23823696	(2013) Isobaric Tagging-Based Quantification for Proteomic Analysis: A Comparative Study of Spared and Affected Muscles from mdx Mice at the Early Phase of Dystrophy.	3	44	0.00094	ENSP00000360671,ENSP00000378669,ENSP00000379386	ALDOA,LDHB,SLC25A5
PMID:31185774	(2019) Glucose Metabolism in Cardiac Hypertrophy and Heart Failure.	3	44	0.00094	ENSP00000270776,ENSP00000290299,ENSP00000402103	ATP5O,HK1,PGD
PMID:26561807	(2015) Low T3 State Is Correlated with Cardiac Mitochondrial Impairments after Ischemia Reperfusion Injury: Evidence from a Proteomic Approach.	3	45	0.00097	ENSP00000221418,ENSP00000357535,ENSP00000379386	ECH1,ECHS1,LDHB
PMID:29568811	(2018) Oxidative Stress and Metabolic Reprogramming in Cr(VI) Carcinogenesis.	3	45	0.00097	ENSP00000270776,ENSP00000378669,ENSP00000402103	ALDOA,HK1,PGD
PMID:22306135	(2012) Alterations of metabolic genes and metabolites in cancer.	3	46	0.00099	ENSP00000364649,ENSP00000379386,ENSP00000402103	HK1,LDHB,SDHB
PMID:29258509	(2017) Chemotherapy diminishes lipid storage capacity of adipose tissue in a preclinical model of colon cancer.	3	46	0.00099	ENSP00000168216,ENSP00000270776,ENSP00000357535	ECHS1,HSD17B10,PGD
PMID:21843327	(2011) The contrasting roles of PPARDelta and PPARGamma in regulating the metabolic switch between oxidation and storage of fats in white adipose tissue.	3	47	0.001	ENSP00000221418,ENSP00000364649,ENSP00000378669	ALDOA,ECH1,SDHB
PMID:28928465	(2017) Endothelial adenosine A2a receptor-mediated glycolysis is essential for pathological retinal angiogenesis.	3	47	0.001	ENSP00000378669,ENSP00000379386,ENSP00000402103	ALDOA,HK1,LDHB
PMID:29629339	(2018) Metabolic Reprogramming in Thyroid Carcinoma.	3	48	0.001	ENSP00000270776,ENSP00000379386,ENSP00000402103	HK1,LDHB,PGD
PMID:30505946	(2018) Metatranscriptomic and Thermodynamic Insights into Medium-Chain Fatty Acid Production Using an Anaerobic Microbiome.	3	47	0.001	ENSP00000357535,ENSP00000379386,ENSP00000402103	ECHS1,HK1,LDHB
PMID:30909720	(2018) Mitochondrial Substrate-Level Phosphorylation as Energy Source for Glioblastoma: Review and Hypothesis.	3	47	0.001	ENSP00000364649,ENSP00000379386,ENSP00000402103	HK1,LDHB,SDHB
PMID:10457361	(1999) Alterations in the glycolytic and glutaminolytic pathways after malignant transformation of rat liver oval cells.	2	3	0.0011	ENSP00000270776,ENSP00000402103	HK1,PGD
PMID:12567696	(2000) [Effect of artemether on enzymes involved in carbohydrate metabolism of Schistosoma japonicum].	2	3	0.0011	ENSP00000270776,ENSP00000402103	HK1,PGD
PMID:1441191	(1992) Some glucose metabolic enzymes in various fractions of sarcocysts of Sarcocystis fusiformis of buffalo (Bubalus bubalis).	2	3	0.0011	ENSP00000270776,ENSP00000402103	HK1,PGD
PMID:15207530	(2004) The effects of n-3 polyunsaturated fatty acids by gavage on some metabolic enzymes of rat liver.	2	3	0.0011	ENSP00000270776,ENSP00000402103	HK1,PGD
PMID:16342474	(2005) Effect of 2,4-dichlorophenoxyacetic acid on the activities of some metabolic enzymes for generating pyridine nucleotide pool of cells from mouse liver.	2	3	0.0011	ENSP00000270776,ENSP00000402103	HK1,PGD
PMID:18305209	(2008) Oxidative pentose phosphate pathway-dependent sugar sensing as a mechanism for regulation of root ion transporters by photosynthesis.	2	3	0.0011	ENSP00000270776,ENSP00000402103	HK1,PGD
PMID:1927152	(1991) [Carbohydrate and lipid metabolism in swine skeletal muscle in the pre- and neonatal periods].	2	3	0.0011	ENSP00000270776,ENSP00000402103	HK1,PGD
PMID:1940362	(1991) Comparative studies of the cytotoxic T lymphocyte-mediated cytotoxicity and of extracellular ATP-induced cell lysis. Different requirements in extracellular Mg2+ and pH.	2	3	0.0011	ENSP00000290299,ENSP00000402103	ATP5O,HK1
PMID:20122995	(2010) Metabolic genes in cancer: their roles in tumor progression and clinical implications.	3	49	0.0011	ENSP00000270776,ENSP00000364649,ENSP00000402103	HK1,PGD,SDHB
PMID:26064985	(2015) Species-Related Differences in the Proteome of Rat and Human Pancreatic Beta Cells.	3	53	0.0011	ENSP00000290299,ENSP00000360671,ENSP00000378669	ALDOA,ATP5O,SLC25A5
PMID:28039521	(2017) ECHS1 deficiency-associated paroxysmal exercise-induced dyskinesias: case presentation and initial benefit of intervention.	2	3	0.0011	ENSP00000221418,ENSP00000357535	ECH1,ECHS1
PMID:28046118	(2017) Transcriptome Analysis Identifies Key Metabolic Changes in the Hooded Seal (Cystophora cristata) Brain in Response to Hypoxia and Reoxygenation.	3	49	0.0011	ENSP00000378669,ENSP00000379386,ENSP00000402103	ALDOA,HK1,LDHB
PMID:32367334	(2020) Immunohistochemical Analysis of the Metabolic Phenotype of Adrenal Cortical Carcinoma.	2	3	0.0011	ENSP00000364649,ENSP00000402103	HK1,SDHB
PMID:6386603	(1984) [Evaluation of the degree of genetic divergence in the twin species of the common vole Microtus arvalis and Microtus subarvalis (Rodentia)].	2	3	0.0011	ENSP00000270776,ENSP00000379386	LDHB,PGD
PMID:21196269	(2011) Emerging metabolic targets in cancer therapy.	3	55	0.0012	ENSP00000364649,ENSP00000379386,ENSP00000402103	HK1,LDHB,SDHB
PMID:15306723	(2004) Isozyme polymorphism and genetic structure of the population of Sorbus torminalis (L.) Crantz from the Bytyn Forest (Poland).	2	4	0.0013	ENSP00000270776,ENSP00000364649	PGD,SDHB
PMID:17927811	(2007) Transcriptional regulatory network for sexual differentiation in fission yeast.	2	4	0.0013	ENSP00000270776,ENSP00000402103	HK1,PGD
PMID:217356	(1978) Preparative-scale enzymic synthesis of D-[14C]ribulose 1,5-bisphosphate.	2	4	0.0013	ENSP00000270776,ENSP00000402103	HK1,PGD
PMID:22103656	(2012) Characterization of molecular interactions between ACP and halogenase domains in the Curacin A polyketide synthase.	2	4	0.0013	ENSP00000221418,ENSP00000364649	ECH1,SDHB
PMID:25243088	(2014) Generalized portrait of cancer metabolic pathways inferred from a list of genes overexpressed in cancer.	3	60	0.0013	ENSP00000357535,ENSP00000378669,ENSP00000379386	ALDOA,ECHS1,LDHB
PMID:25446928	(2014) The alpha-tocopherol derivative ESeroS-GS induces cell death and inhibits cell motility of breast cancer cells through the regulation of energy metabolism.	2	4	0.0013	ENSP00000364649,ENSP00000402103	HK1,SDHB
PMID:29455660	(2018) The relevance of tyrosine kinase inhibitors for global metabolic pathways in cancer.	3	58	0.0013	ENSP00000364649,ENSP00000378669,ENSP00000402103	ALDOA,HK1,SDHB
PMID:29916179	(2018) Changes in the activity of some metabolic enzymes in the heart of SHR rat incurred by transgenic expression of CD36.	2	4	0.0013	ENSP00000364649,ENSP00000402103	HK1,SDHB
PMID:6942558	(1981) [Isolation and characteristics of somatic cell hybrids of the Chinese hamster and American mink].	2	4	0.0013	ENSP00000270776,ENSP00000379386	LDHB,PGD
PMID:8135069	(1993) Swine erythrocyte fractionation in Percoll density gradients.	2	4	0.0013	ENSP00000270776,ENSP00000402103	HK1,PGD
PMID:84496	(1979) Enzyme histochemistry of the small intestine in inherited ichthyosis.	2	4	0.0013	ENSP00000270776,ENSP00000378669	ALDOA,PGD
PMID:27418963	(2016) Novel drugs that target the metabolic reprogramming in renal cell cancer.	3	61	0.0014	ENSP00000270776,ENSP00000357535,ENSP00000364649	ECHS1,PGD,SDHB
PMID:123168	(1975) Influence of insulin on estrogen-induced responses in the r3230ac mammary carcinoma.	2	5	0.0015	ENSP00000270776,ENSP00000402103	HK1,PGD
PMID:21987487	(2012) Impaired butyrate oxidation in ulcerative colitis is due to decreased butyrate uptake and a defect in the oxidation pathway.	2	5	0.0015	ENSP00000168216,ENSP00000357535	ECHS1,HSD17B10
PMID:24536034	(2014) Systems analysis of transcriptional data provides insights into muscle's biological response to botulinum toxin.	4	226	0.0015	ENSP00000357535,ENSP00000364649,ENSP00000379386,ENSP00000402103	ECHS1,HK1,LDHB,SDHB
PMID:25008973	(2014) Design and construction of a non-natural malate to 1,2,4-butanetriol pathway creates possibility to produce 1,2,4-butanetriol from glucose.	2	5	0.0015	ENSP00000378669,ENSP00000379386	ALDOA,LDHB
PMID:29378228	(2018) The pro-tumorigenic effects of metabolic alterations in glioblastoma including brain tumor initiating cells.	3	64	0.0015	ENSP00000270776,ENSP00000378669,ENSP00000379386	ALDOA,LDHB,PGD
PMID:30911039	(2019) Measurement of lactate levels in postmortem brain, iPSCs, and animal models of schizophrenia.	2	5	0.0015	ENSP00000379386,ENSP00000402103	HK1,LDHB
PMID:5693642	(1968) Effect of alloxan-diabetes and treatment with anti-insulin serum on pathways of glucose metabolism in lactating rat mammary gland.	2	5	0.0015	ENSP00000270776,ENSP00000402103	HK1,PGD
PMID:6459912	(1981) Chromosome localization of three syntenic gene pairs in the American mink (Mustela vison).	2	5	0.0015	ENSP00000270776,ENSP00000379386	LDHB,PGD
PMID:8275011	(1993) Effects of prolactin and androgens on enzymes of carbohydrate metabolism in seminal vesicles of castrated mature bonnet monkeys, Macaca radiata.	2	5	0.0015	ENSP00000270776,ENSP00000402103	HK1,PGD
PMID:29114203	(2017) Collagen VI Null Mice as a Model for Early Onset Muscle Decline in Aging.	3	68	0.0017	ENSP00000378669,ENSP00000379386,ENSP00000402103	ALDOA,HK1,LDHB
PMID:31558821	(2019) Quantitative proteomic analysis of enhanced cellular effects of electrochemotherapy with Cisplatin in triple-negative breast cancer cells.	2	6	0.0018	ENSP00000378669,ENSP00000379386	ALDOA,LDHB
PMID:32218849	(2020) Intratumoral heterogeneity of glutaminase and lactate dehydrogenase A protein expression in colorectal cancer.	2	6	0.0018	ENSP00000379386,ENSP00000402103	HK1,LDHB

## Sheet: KEGG Pathway1
#term ID	term description	observed gene count	background gene count	false discovery rate	matching proteins in your network (IDs)	matching proteins in your network (labels)
hsa01200	Carbon metabolism	5	116	1.56e-07	ENSP00000270776,ENSP00000357535,ENSP00000364649,ENSP00000378669,ENSP00000402103	ALDOA,ECHS1,HK1,PGD,SDHB
hsa01100	Metabolic pathways	8	1250	8.28e-07	ENSP00000168216,ENSP00000270776,ENSP00000290299,ENSP00000357535,ENSP00000364649,ENSP00000378669,ENSP00000379386,ENSP00000402103	ALDOA,ATP5O,ECHS1,HK1,HSD17B10,LDHB,PGD,SDHB
hsa00010	Glycolysis / Gluconeogenesis	3	68	0.0001	ENSP00000378669,ENSP00000379386,ENSP00000402103	ALDOA,HK1,LDHB
hsa05012	Parkinson's disease	3	142	0.00066	ENSP00000290299,ENSP00000360671,ENSP00000364649	ATP5O,SDHB,SLC25A5
hsa05010	Alzheimer's disease	3	168	0.00086	ENSP00000168216,ENSP00000290299,ENSP00000364649	ATP5O,HSD17B10,SDHB
hsa00030	Pentose phosphate pathway	2	30	0.00099	ENSP00000270776,ENSP00000378669	ALDOA,PGD
hsa00051	Fructose and mannose metabolism	2	33	0.00099	ENSP00000378669,ENSP00000402103	ALDOA,HK1
hsa00640	Propanoate metabolism	2	32	0.00099	ENSP00000357535,ENSP00000379386	ECHS1,LDHB
hsa05016	Huntington's disease	3	193	0.00099	ENSP00000290299,ENSP00000360671,ENSP00000364649	ATP5O,SDHB,SLC25A5
hsa00280	Valine, leucine and isoleucine degradation	2	48	0.0015	ENSP00000168216,ENSP00000357535	ECHS1,HSD17B10
hsa04066	HIF-1 signaling pathway	2	98	0.0053	ENSP00000378669,ENSP00000402103	ALDOA,HK1
hsa00190	Oxidative phosphorylation	2	131	0.0085	ENSP00000290299,ENSP00000364649	ATP5O,SDHB
hsa04714	Thermogenesis	2	228	0.0228	ENSP00000290299,ENSP00000364649	ATP5O,SDHB

[truncated: 1 more sheets: RCTM Pathway1]
